# Supplementary material for: The Regulation of Ruminal Short-Chain Fatty Acids on the Functions of Rumen Barriers
Source: Front Physiol. 2019 Oct 25;10:1305. doi: 10.3389/fphys.2019.01305 (PMC6842973; doi:10.3389/fphys.2019.01305)
Supplement: TABLE S4 — Gene compositions and abundances in the rumen epithelium. [file Table_4.XLSX]

## Sheet: Sheet1
ITEM	gene id	gene	LC	MC	HC	LC vs MC				MC vs HC
						p.adjust	p.correct	log2(MC/LC)	significance	p.adjust	p.correct	log2(HC/MC)	significance
1	1485856	ND1	5891.93 ± 46.18	8244.65 ± 365.59	10224.1 ± 204.34	0.269	0.538	0.48		3.28043e-15	6.56e-15	0.31
2	1485857	ND2	5624.33 ± 110.39	5779.32 ± 212.89	5121.59 ± 194.58	0.942	1	0.04		1.74152e-08	3.48e-08	-0.17
3	1485859	COX2	26331.77 ± 896.31	28726.5 ± 1000.59	33166.4 ± 806.49	0.868	1	0.13		2.49006e-15	4.98e-15	0.21
4	1485863	ND3	11259.02 ± 194.95	13184.4 ± 792.38	16443.8 ± 1014.43	0.454	0.908	0.23		2.61913e-10	5.24e-10	0.32
5	1485866	ND5	3635.8 ± 78.91	5863.77 ± 138.98	5320.9 ± 168.54	0.237	0.474	0.69		3.01816e-07	6.04e-07	-0.14
6	1485867	ND6	2835.83 ± 146.75	5467.41 ± 90.82	4758.21 ± 71.89	0.558	1	0.95		8.8535e-15	1.77e-14	-0.2
7	1485868	CYTB	15443.38 ± 771.05	17529.9 ± 522.37	20271.3 ± 366.31	0.832	1	0.18		5.70157e-20	1.14e-19	0.21
8	100750233	GNS	35.2 ± 0.56	47.89 ± 2.28	57.44 ± 1.77	0.0191	0.0382	0.44		0.34435	0.688701	0.26
9	100846984	BAX	24.98 ± 1	31.17 ± 0.48	26.89 ± 0.95	0.747	1	0.32		0.634345	1	-0.21
10	100860742	NOS2	5.95 ± 0.13	14.4 ± 0.32	24.66 ± 2.3	0.00038	0.00076	1.28	UP	0.00770259	0.0154052	0.78
11	100860744	IGF2R	7.99 ± 0.15	5.38 ± 0.38	7.65 ± 0.49	0.0023	0.0046	-0.57		0.487687	0.975374	0.51
12	100860747	TLR2	19.06 ± 0.53	8.37 ± 0.2	5.61 ± 0.33	0.00038	0.00076	-1.19	DN	0.433503	0.867006	-0.58
13	100860749	CAV1	15.31 ± 3.93	26.23 ± 3.7	5.98 ± 0.98	0.00038	0.00076	0.78		8.20837e-09	1.642e-08	-2.13	DN
14	100860751	CDK2	5.57 ± 0.07	9.34 ± 0.21	7.87 ± 0.09	0.00206	0.00412	0.75		0.816131	1	-0.25
15	100860752	FTH1	1569.81 ± 86.01	1103.13 ± 29.75	1628.62 ± 106.11	0.0168	0.0336	-0.51		8.31306e-37	1.662e-36	0.56
16	100860753	RNASEH2B	4.23 ± 0.28	6.45 ± 0.05	4.03 ± 0.25	0.0722	0.1444	0.61		0.52294	1	-0.68
17	100860754	DPF2	20.85 ± 0.37	23.95 ± 0.84	27.42 ± 0.6	0.394	0.788	0.2		0.753514	1	0.19
18	100860756	OGN	4.03 ± 0.59	4.25 ± 0.62	3.93 ± 0.49	0.939	1	0.08		0.986068	1	-0.11
19	100860757	MMADHC	103.43 ± 4.55	126.03 ± 1.77	120.41 ± 4.14	0.152	0.304	0.29		0.76673	1	-0.07
20	100860758	MGST3	1436.41 ± 99.54	2168 ± 53.84	2382.71 ± 49.23	0.0175	0.035	0.59		0.198262	0.396524	0.14
21	100860760	MT3	1.86 ± 0.15	0.95 ± 0.11	1.21 ± 0.14	0.294	0.588	-0.97		0.808253	1	0.34
22	100860763	SCD	2.51 ± 0.19	7.25 ± 0.58	2.97 ± 0.14	0.00038	0.00076	1.53	UP	0.00164612	0.00329224	-1.29	DN
23	100860765	GNAI2	25.45 ± 1.71	23.83 ± 1.08	24.25 ± 0.46	0.677	1	-0.09		0.990335	1	0.03
24	100860772	RSPO3	1.4 ± 0.07	0.92 ± 0.14	1.65 ± 0.07	0.00299	0.00598	-0.62		0.298903	0.597805	0.85
25	100860775	TNNI3	55.91 ± 7.35	80.28 ± 4.45	88.47 ± 5.15	0.00591	0.01182	0.52		0.786513	1	0.14
26	100860776	RPS2	6160.55 ± 418.87	4936.85 ± 37.17	8908.57 ± 333.84	0.418	0.836	-0.32		0	0	0.85
27	100860777	RPL21	2403.86 ± 205.07	2327.73 ± 35.63	3391.15 ± 46.48	0.884	1	-0.05		4.38887e-98	8.78e-98	0.54
28	100860778	SERF2	880.9 ± 90.69	798.2 ± 37.09	927.66 ± 54.41	0.567	1	-0.14		0.0407463	0.0814927	0.22
29	100860780	EEF1A1	1773.27 ± 0	1773.27 ± 23.15	2591.71 ± 36.03	1	1	0		2.39407e-79	4.78e-79	0.55
30	100860781	LOC100860781	129.79 ± 9.12	1.5 ± 0.09	1.65 ± 0.34	0.00038	0.00076	-6.43	DN	0.583497	1	0.13
31	100860782	NDUFS7	191.21 ± 10.06	166.72 ± 4.55	255.79 ± 8.62	0.338	0.676	-0.2		3.72476e-12	7.44e-12	0.62
32	100860783	RPS18	5134.24 ± 434.08	5125.96 ± 235.84	6862.87 ± 373.51	0.995	1	0		5.4207e-54	1.084e-53	0.42
33	100860786	CFLAR	9.15 ± 0.23	6.6 ± 0.07	6.75 ± 0.25	0.0543	0.1086	-0.47		0.992082	1	0.03
34	100860787	SDF4	116 ± 5.55	108.59 ± 4.33	151.59 ± 7.02	0.667	1	-0.1		4.83911e-05	9.68e-05	0.48
35	100860788	LOC100860788	5.82 ± 0.19	5.66 ± 0.25	4.5 ± 0.13	0.901	1	-0.04		0.87533	1	-0.33
36	100860789	BMP4	2.1 ± 0.21	1.51 ± 0.09	3.37 ± 0.17	0.315	0.63	-0.47		0.00408046	0.00816093	1.16	UP
37	100860793	BMP6	1.36 ± 0.05	7.61 ± 0.27	3.8 ± 0.14	0.166	0.332	2.49		0.255782	0.511563	-1
38	100860795	FOXP2	1.61 ± 0.17	0.93 ± 0.07	1.75 ± 0.03	0.00038	0.00076	-0.79		0.298903	0.597805	0.91
39	100860796	RAB1A	122.34 ± 6.01	149.89 ± 0.68	131.01 ± 3.38	0.137	0.274	0.29		0.165277	0.330555	-0.19
40	100860797	UBE2K	53.23 ± 1.79	67.83 ± 2.49	69.15 ± 3.01	0.096	0.192	0.35		0.987816	1	0.03
41	100860798	RAB14	70.75 ± 2.12	71.59 ± 4.45	83.65 ± 4.03	0.974	1	0.02		0.316831	0.633662	0.22
42	100860799	GHITM	231.76 ± 13.27	220.97 ± 3.54	266.22 ± 6.91	0.823	1	-0.07		0.00185513	0.00371025	0.27
43	100860800	SPARC	113.19 ± 12.43	85.81 ± 6.98	79.72 ± 3.23	0.0554	0.1108	-0.4		0.816131	1	-0.11
44	100860803	URM1	78.61 ± 8.5	66.87 ± 4.86	78.89 ± 5.56	0.657	1	-0.23		0.831413	1	0.24
45	100860804	SAT1	293.5 ± 17.91	149.23 ± 1.64	297.15 ± 8.18	0.00038	0.00076	-0.98		2.91459e-34	5.82e-34	0.99
46	100860808	CD9	943.55 ± 51.24	1347.05 ± 17.52	997.64 ± 37.58	0.0343	0.0686	0.51		2.64923e-29	5.3e-29	-0.43
47	100860811	CD81	1187.2 ± 77.78	700.98 ± 28.06	560.83 ± 28.32	0.00038	0.00076	-0.76		9.52137e-08	1.904e-07	-0.32
48	100860811	CD81	1404.94 ± 77.78	829.55 ± 28.06	786.79 ± 28.32	0.00038	0.00076	-0.76		0.364955	0.729909	-0.08
49	100860812	IGFBP4	37.19 ± 4.82	20.76 ± 2.56	24.97 ± 1.63	0.00206	0.00412	-0.84		0.704751	1	0.27
50	100860813	LOC100860813	33.01 ± 1.15	14.27 ± 0.81	11.76 ± 0.43	0.00038	0.00076	-1.21	DN	0.774451	1	-0.28
51	100860818	RHOB	68.18 ± 1.34	48.71 ± 1.09	92.57 ± 3.64	0.0163	0.0326	-0.49		1.04433e-09	2.08e-09	0.93
52	100860820	MAPT	4.35 ± 0.25	7.64 ± 0.54	8.51 ± 0.51	0.00181	0.00362	0.81		0.905218	1	0.16
53	100860826	LOC100860826	10 ± 1.74	2.13 ± 0.31	4.12 ± 0.16	0.00038	0.00076	-2.23	DN	0.196681	0.393361	0.95
54	100860827	AR	3.25 ± 0.05	1.95 ± 0.05	4.55 ± 2.22	0.00038	0.00076	-0.74		0.354552	0.709103	1.22
55	100860828	COL1A1	41.63 ± 5.95	19.94 ± 1.77	26.76 ± 0.89	0.00038	0.00076	-1.06	DN	0.244724	0.489448	0.42
56	100860829	BCNT	18.13 ± 0.87	22.52 ± 0.88	19.9 ± 1.08	0.233	0.466	0.31		0.609886	1	-0.18
57	100860830	P97BCNT	30.92 ± 2.06	40.49 ± 0.93	26.07 ± 0.36	0.0352	0.0704	0.39		0.0107168	0.0214336	-0.64
58	100860831	BMP2	13.26 ± 0.61	13.28 ± 0.67	24.95 ± 0.64	0.993	1	0		0.0101511	0.0203021	0.91
59	100860835	CCNT1	3.46 ± 0.21	4.41 ± 0.04	4.27 ± 0.02	0.0866	0.1732	0.35		1	1	-0.05
60	100860836	KDR	2.78 ± 0.59	3.26 ± 0.31	1.96 ± 0.34	0.352	0.704	0.23		0.426107	0.852214	-0.73
61	100860837	FLT1	2.47 ± 0.27	3.19 ± 0.15	2.41 ± 0.2	0.101	0.202	0.37		0.762605	1	-0.4
62	100860839	FOSB	0.78 ± 0.03	1.55 ± 0.01	1.54 ± 0.05	0.00407	0.00814	0.99		1	1	-0.01
63	100860840	PSMA6	122.39 ± 8.99	139.97 ± 2.3	126.55 ± 2.12	0.344	0.688	0.19		0.422391	0.844782	-0.15
64	100860844	TLR5	12.05 ± 0.52	5.6 ± 0.18	13.54 ± 0.3	0.00038	0.00076	-1.11	DN	0.000901713	0.00180343	1.28	UP
65	100860846	FABP3	2.91 ± 0.06	1.49 ± 0.15	1.16 ± 0.05	0.095	0.19	-0.97		0.6434	1	-0.36
66	100860849	HSP70.1	447.69 ± 0	447.69 ± 0	610.83 ± 0	0.00038	0.00076	0		1.15624e-16	2.32e-16	0.45
67	100860851	HSP90AA1	324.42 ± 11.5	501.37 ± 6.34	438.57 ± 6.6	0.0146	0.0292	0.63		0.00215971	0.00431943	-0.19
68	100860853	ARG1	156.93 ± 18	15.7 ± 0.66	29.49 ± 1.74	0.00038	0.00076	-3.32	DN	0.00281767	0.00563534	0.91
69	100860854	ASL	39.29 ± 2.1	33.8 ± 1.46	69.45 ± 3.12	0.285	0.57	-0.22		1.12267e-09	2.24e-09	1.04	UP
70	100860855	CAT	90.97 ± 0.71	87.38 ± 0.9	94.16 ± 1.84	0.814	1	-0.06		0.652267	1	0.11
71	100860856	SOD2	90.71 ± 1.56	58.45 ± 1.79	68.13 ± 1.24	0.00038	0.00076	-0.63		0.36799	0.735981	0.22
72	100860863	ME1	144.4 ± 2.61	186.16 ± 6.34	297.84 ± 5.13	0.101	0.202	0.37		3.9652e-18	7.94e-18	0.68
73	100860867	GPX4	131.03 ± 6.58	164.13 ± 0.65	187.44 ± 5.47	0.0836	0.1672	0.32		0.0943373	0.188675	0.19
74	100860870	LDH-A	358.47 ± 17	393.32 ± 7.1	420.84 ± 3.52	0.613	1	0.13		0.382342	0.764683	0.1
75	100860871	PENK	1.2 ± 0.36	1.68 ± 0.34	1.21 ± 0.41	0.411	0.822	0.49		0.6434	1	-0.48
76	100860872	GAPDH	387.5 ± 12.47	272.64 ± 4.79	312.22 ± 10.91	0.0133	0.0266	-0.51		0.031254	0.062508	0.2
77	100860876	RORC	19.68 ± 0.24	9.89 ± 0.44	13.36 ± 0.2	0.00038	0.00076	-0.99		0.541476	1	0.43
78	100860878	SLC14A1	43.48 ± 0.37	128.17 ± 3.58	138.98 ± 2.96	0.00038	0.00076	1.56	UP	0.547182	1	0.12
79	100860879	ASS1	23.81 ± 1.28	26.18 ± 0.94	35.72 ± 1.21	0.54	1	0.14		0.103673	0.207347	0.45
80	100860881	SDHD	286.74 ± 11.34	312.97 ± 9.22	294.09 ± 10.55	0.635	1	0.13		0.308206	0.616411	-0.09
81	100860882	PDIA3	138.04 ± 1.01	182.84 ± 3.84	149.94 ± 0.59	0.0364	0.0728	0.41		0.0191253	0.0382505	-0.29
82	100860883	ACTG1	999.2 ± 33.37	1539.09 ± 30.61	1340.88 ± 29.06	0.0477	0.0954	0.62		1.15115e-06	2.3e-06	-0.2
83	100860885	KANSL2	6.69 ± 0.03	5.62 ± 0.24	2.93 ± 0.06	0.334	0.668	-0.25		0.29699	0.593981	-0.94
84	100860889	PNPLA2	28.15 ± 0.38	42.81 ± 0.89	65.1 ± 3.01	0.00129	0.00258	0.6		0.000220689	0.000441378	0.6
85	100860890	HMGCS2	1558.89 ± 72.71	2369.28 ± 72.63	3060.8 ± 56.36	0.123	0.246	0.6		7.83089e-36	1.566e-35	0.37
86	100860894	PTGIS	13.57 ± 0.44	7.97 ± 0.25	11.32 ± 0.45	0.00038	0.00076	-0.77		0.433503	0.867006	0.51
87	100860899	CRISP3	74.39 ± 2.97	40.26 ± 2.44	113.05 ± 12.84	0.00038	0.00076	-0.89		3.25402e-20	6.5e-20	1.49	UP
88	100860902	MTOR	8.65 ± 0.15	8.83 ± 0.39	10.62 ± 0.4	0.907	1	0.03		0.762455	1	0.27
89	100860903	RPSA	3283.88 ± 218.76	3010.1 ± 41.67	4626.12 ± 197.24	0.764	1	-0.13		4.30409e-184	8.6e-184	0.62
90	100860904	AKT1	37.59 ± 2.18	37.93 ± 1.63	44 ± 1.08	0.962	1	0.01		0.661599	1	0.21
91	100860906	NR1H3	9.51 ± 0.18	7.03 ± 0.32	10.73 ± 0.46	0.0671	0.1342	-0.44		0.487687	0.975374	0.61
92	100860907	PTHLH	1.09 ± 0.19	1.59 ± 0.14	1.37 ± 0.03	0.379	0.758	0.54		0.298903	0.597806	-0.21
93	100860908	SREBF1	37.27 ± 1.27	28.19 ± 1.19	24.89 ± 0.59	0.183	0.366	-0.4		0.760994	1	-0.18
94	100860911	SP1	14.24 ± 0.25	9.79 ± 0.62	15.22 ± 0.76	0.00629	0.01258	-0.54		0.188134	0.376267	0.64
95	100860912	AGPAT1	14.72 ± 0.28	17.8 ± 0.05	18.63 ± 0.29	0.188	0.376	0.27		0.970483	1	0.07
96	100860915	ASIP	300.83 ± 4.8	361.11 ± 5.92	509.35 ± 14.18	0.182	0.364	0.26		3.9652e-18	7.94e-18	0.5
97	100860916	ANGPTL4	7.03 ± 0.29	3.41 ± 0.16	4.45 ± 0.09	0.00038	0.00076	-1.04	DN	0.808395	1	0.38
98	100860918	ACVR2A	4.56 ± 0.21	6.18 ± 0.21	5.47 ± 0.31	0.0299	0.0598	0.44		0.920307	1	-0.18
99	100860919	ETS1	2.45 ± 0.2	1.42 ± 0.11	1.48 ± 0.03	0.0265	0.053	-0.79		0.825079	1	0.06
100	100860924	TIMP1	11.6 ± 1.12	9.66 ± 0.82	6.95 ± 0.13	0.735	1	-0.26		0.515911	1	-0.47
101	100860925	COL15A1	6.01 ± 0.78	2.96 ± 0.31	2.19 ± 0.03	0.00038	0.00076	-1.02	DN	0.616759	1	-0.43
102	100860926	ACVR1	4.53 ± 0.29	4.19 ± 0.07	3.25 ± 0.09	0.7	1	-0.11		0.498305	0.99661	-0.36
103	100860927	B4GALT1	8.6 ± 0.56	8.09 ± 0.37	11.83 ± 0.28	0.797	1	-0.09		0.405944	0.811888	0.55
104	100860935	NUCB1	81.09 ± 3.05	78.53 ± 3.29	103.11 ± 4.39	0.859	1	-0.05		0.0213691	0.0427381	0.39
105	100860936	RNASEH2A	12.82 ± 0.48	13.7 ± 0.14	17.01 ± 0.66	0.769	1	0.1		0.610811	1	0.31
106	100860937	CXXC5	7.41 ± 0.21	10.15 ± 0.11	6.51 ± 0.04	0.0491	0.0982	0.46		0.383144	0.766288	-0.64
107	100860938	COL3A1	89.09 ± 12.86	42.15 ± 3.85	43.88 ± 3.58	0.00038	0.00076	-1.08	DN	1	1	0.06
108	100860940	COL1A2	44.59 ± 5.79	21.6 ± 2	24.54 ± 1.32	0.00038	0.00076	-1.05	DN	0.631693	1	0.18
109	100860941	LOC100860941	28.37 ± 2.5	100.67 ± 5.81	64.11 ± 5.46	0.198	0.396	1.83		2.06096e-06	4.12e-06	-0.65
110	100860943	TSC2	13.31 ± 0.15	8.38 ± 0.28	14.02 ± 0.62	0.00038	0.00076	-0.67		0.245214	0.490429	0.74
111	100860944	DCN	74.88 ± 8.37	57.69 ± 5.94	37.67 ± 4.75	0.0739	0.1478	-0.38		0.0183721	0.0367443	-0.61
112	100860945	EPHX1	198.81 ± 2.87	166.29 ± 3.17	237.01 ± 6.9	0.227	0.454	-0.26		1.01134e-08	2.02e-08	0.51
113	100860946	OAZ1	422.51 ± 16.6	464.87 ± 15.52	596.46 ± 13.14	0.565	1	0.14		9.66829e-12	1.934e-11	0.36
114	100860948	SLC39A3	7.58 ± 0.29	12.5 ± 0.52	10.05 ± 0.19	0.00129	0.00258	0.72		0.673171	1	-0.32
115	100860949	SLC39A13	19.02 ± 1.2	16.88 ± 0.4	18.55 ± 0.4	0.492	0.984	-0.17		0.816131	1	0.14
116	100860950	IGFBP5	22.13 ± 1.49	10.73 ± 0.35	34.57 ± 1.63	0.00038	0.00076	-1.04	DN	9.82401e-09	1.964e-08	1.69	UP
117	100860951	HMOX1	39.98 ± 1.92	13.52 ± 0.56	76.69 ± 4.94	0.00038	0.00076	-1.56	DN	5.42469e-28	1.084e-27	2.5	UP
118	100860953	FKBP8	116.55 ± 6.14	118.98 ± 2.26	175.7 ± 7.09	0.909	1	0.03		4.85764e-08	9.72e-08	0.56
119	100860957	VEGFA	25.7 ± 2.31	28.8 ± 0.76	28.91 ± 0.18	0.437	0.874	0.16		0.99258	1	0.01
120	100860958	CD36	1.79 ± 0.37	1.41 ± 0.23	0.77 ± 0.16	0.425	0.85	-0.35		0.505043	1	-0.87
121	100860961	PPIA	1269.13 ± 76.94	1727.81 ± 45.25	1507.56 ± 36.37	0.0584	0.1168	0.45		8.47947e-11	1.696e-10	-0.2
122	100860962	THTPA	9.37 ± 0.14	6.72 ± 0.05	8.63 ± 0.23	0.092	0.184	-0.48		0.72124	1	0.36
123	100860963	DAD1	225.9 ± 16.62	350.28 ± 7.77	316.78 ± 15.22	0.000707	0.001414	0.63		0.0653783	0.130757	-0.15
124	100860964	TOX4	18.65 ± 0.33	19.13 ± 0.35	18.67 ± 0.29	0.882	1	0.04		1	1	-0.04
125	100860965	SUPT16H	9.54 ± 0.4	11.08 ± 0.07	8.11 ± 0.23	0.369	0.738	0.22		0.507547	1	-0.45
126	100860966	HNRNPC	77.9 ± 3.14	90.44 ± 1.45	95.83 ± 1.63	0.289	0.578	0.22		0.668393	1	0.08
127	100860967	APEX1	40.46 ± 2.53	42.74 ± 0.45	38.82 ± 0.92	0.737	1	0.08		0.710353	1	-0.14
128	100860968	TTC9C	5.77 ± 0.22	7.16 ± 0.18	5.85 ± 0.2	0.179	0.358	0.31		0.816131	1	-0.29
129	100860969	GREM1	5.1 ± 0.28	4.62 ± 0.4	7.19 ± 0.15	0.556	1	-0.15		0.392243	0.784487	0.64
130	100860971	THBS1	3.91 ± 0.5	2.82 ± 0.28	5.54 ± 0.65	0.0318	0.0636	-0.47		0.230301	0.460601	0.98
131	100860972	BMF	9.47 ± 0.21	3.42 ± 0.14	5.85 ± 0.14	0.00038	0.00076	-1.47	DN	0.312852	0.625704	0.78
132	100860973	PAK6	11.24 ± 0.6	11.83 ± 0.57	12.94 ± 0.16	0.753	1	0.07		0.956986	1	0.13
133	100860975	RAB11B	59.68 ± 0.63	44.73 ± 0.4	69.57 ± 3.29	0.0281	0.0562	-0.42		0.000642267	0.00128453	0.64
134	100860977	CLIC1	105.54 ± 7.52	202.85 ± 1.61	121.78 ± 2.78	0.00038	0.00076	0.94		7.33225e-14	1.466e-13	-0.74
135	100860983	DHX16	6.87 ± 0.06	7.05 ± 0.21	9.49 ± 0.16	0.889	1	0.04		0.557499	1	0.43
136	100860984	PRR3	3.78 ± 0.12	6.33 ± 0.19	5.63 ± 0.19	0.00513	0.01026	0.75		0.990335	1	-0.17
137	100860985	LOC100860985	1.14 ± 0.18	0.97 ± 0.02	0.63 ± 0.03	0.407	0.814	-0.24		1	1	-0.62
138	100860986	ZNF322	4.47 ± 0.18	4.09 ± 0.05	3.48 ± 0.14	0.655	1	-0.13		0.890824	1	-0.23
139	100860987	GMNN	4.69 ± 0.24	11.44 ± 0.45	7.75 ± 0.58	0.00038	0.00076	1.29	UP	0.433503	0.867006	-0.56
140	100860988	TPMT	228.63 ± 15.56	215.39 ± 2.65	197.1 ± 5.46	0.73	1	-0.09		0.367451	0.734902	-0.13
141	100860989	SIRT5	27.89 ± 2.14	26.68 ± 0.73	30.44 ± 1.14	0.788	1	-0.06		0.72124	1	0.19
142	100860990	TBC1D7	8.32 ± 0.49	11.78 ± 0.34	10.25 ± 0.17	0.027	0.054	0.5		0.784206	1	-0.2
143	100860991	TRIM38	2.3 ± 0.08	2.18 ± 0.17	1.18 ± 0.06	0.868	1	-0.07		0.298903	0.597806	-0.88
144	100860992	SNRNP48	6.69 ± 0.43	5.67 ± 0.17	6.63 ± 0.31	0.502	1	-0.24		0.851596	1	0.23
145	100860995	RPL10A	1716.92 ± 152.49	1498.46 ± 38.47	2109.1 ± 63.58	0.487	0.974	-0.2		2.19628e-43	4.4e-43	0.49
146	100860996	MAPK13	56.22 ± 1.68	57.02 ± 1.06	127.42 ± 4.54	0.935	1	0.02		2.17758e-19	4.36e-19	1.16	UP
147	100860998	PPIL1	29.82 ± 1.57	38.09 ± 0.49	31.05 ± 0.57	0.069	0.138	0.35		0.396503	0.793005	-0.3
148	100861002	MRPS10	73.95 ± 1.05	97.19 ± 2.59	111.04 ± 1.75	0.0411	0.0822	0.39		0.258014	0.516028	0.19
149	100861003	POLR1C	14.01 ± 1.01	17.41 ± 0.19	12.26 ± 0.19	0.155	0.31	0.31		0.271776	0.543552	-0.51
150	100861004	MRPL14	45.61 ± 4.13	52.38 ± 0.85	66.96 ± 0.9	0.574	1	0.2		0.0812541	0.162508	0.35
151	100861005	SLC29A1	11.06 ± 0.44	19.25 ± 0.25	17.22 ± 0.33	0.00038	0.00076	0.8		0.802837	1	-0.16
152	100861006	HSP90AB1	294.58 ± 12.19	344.16 ± 9.43	423.16 ± 20.9	0.393	0.786	0.22		1.05239e-05	2.1e-05	0.3
153	100861007	CDC5L	17.1 ± 0.7	15.63 ± 0.53	16.47 ± 0.87	0.552	1	-0.13		0.965386	1	0.08
154	100861008	SUPT3H	3.69 ± 0.09	2.27 ± 0.04	4.02 ± 0.28	0.0672	0.1344	-0.7		0.143945	0.287891	0.82
155	100861009	KCTD1	71.3 ± 2.91	39.82 ± 1.34	63.26 ± 1.73	0.00038	0.00076	-0.84		0.000360867	0.000721734	0.67
156	100861010	OSBPL1A	15.83 ± 0.04	14.87 ± 0.41	20.64 ± 0.76	0.678	1	-0.09		0.23266	0.465321	0.47
157	100861011	CYB5A	140.8 ± 9.98	183.21 ± 4.29	219.39 ± 3.03	0.0584	0.1168	0.38		0.0146778	0.0293557	0.26
158	100861013	RALBP1	14.68 ± 0.42	15.26 ± 0.37	16.88 ± 0.48	0.812	1	0.06		0.713602	1	0.15
159	100861014	SPIRE1	4.58 ± 0.18	4.04 ± 0.08	4.13 ± 0.14	0.499	0.998	-0.18		1	1	0.03
160	100861015	PSMG2	13.99 ± 0.34	18.45 ± 0.57	16.78 ± 0.26	0.0875	0.175	0.4		0.839503	1	-0.14
161	100861016	IER3IP1	17.71 ± 0.26	33.65 ± 0.83	22.68 ± 0.98	0.00038	0.00076	0.93		0.0596412	0.119282	-0.57
162	100861018	LOC100861018	5553.29 ± 387.16	4995.8 ± 61.54	5665.17 ± 59.84	0.695	1	-0.15		2.48051e-20	4.96e-20	0.18
163	100861019	SMAD4	9.74 ± 0.29	10.6 ± 0.42	11.6 ± 0.21	0.568	1	0.12		0.784206	1	0.13
164	100861020	TXNL1	42.36 ± 1.13	48.99 ± 1.52	42.24 ± 0.48	0.291	0.582	0.21		0.50757	1	-0.21
165	100861022	HIGD1A	467.72 ± 47.36	597.28 ± 2.68	543.6 ± 18.34	0.0916	0.1832	0.35		0.0278759	0.0557518	-0.14
166	100861023	RBM17	14.84 ± 0.68	17.43 ± 0.03	14.35 ± 0.05	0.254	0.508	0.23		0.648463	1	-0.28
167	100861025	CLCN7	12.48 ± 0.53	11.53 ± 0.19	10.16 ± 0.15	0.614	1	-0.11		0.816131	1	-0.18
168	100861026	SCNN1B	3.05 ± 0.13	2.58 ± 0.15	3.74 ± 0.15	0.456	0.912	-0.24		0.259111	0.518223	0.53
169	100861028	BOLA2B	220.44 ± 28.26	212.14 ± 12.86	269.52 ± 9.63	0.83	1	-0.06		2.19432e-05	4.38e-05	0.35
170	100861029	CDIPT	16.58 ± 0.64	18.93 ± 0.4	19.04 ± 0.57	0.369	0.738	0.19		1	1	0.01
171	100861031	ZNF48	1.31 ± 0.02	1.91 ± 0.04	1.66 ± 0.07	0.125	0.25	0.54		1	1	-0.2
172	100861033	SUMF2	13 ± 1.03	12.01 ± 0.61	14.23 ± 0.71	0.686	1	-0.11		0.702859	1	0.24
173	100861034	RABGEF1	5.93 ± 0.18	8.04 ± 0.07	7.82 ± 0.42	0.0247	0.0494	0.44		0.994112	1	-0.04
174	100861035	GATSL2	1.87 ± 0.28	1.02 ± 0.04	1.31 ± 0.08	0.00101	0.00202	-0.88		1	1	0.37
175	100861036	MLST8	9.96 ± 0.25	6.89 ± 0.49	11.03 ± 0.3	0.0283	0.0566	-0.53		0.379734	0.759467	0.68
176	100861038	POLR2J	58.38 ± 3.99	76.19 ± 1.33	77.64 ± 2.06	0.0591	0.1182	0.38		1	1	0.03
177	100861039	PLOD3	5.23 ± 0.18	3.18 ± 0.03	4.96 ± 0.34	0.00387	0.00774	-0.72		0.433503	0.867006	0.64
178	100861041	SMNDC1	9.95 ± 0.13	10.45 ± 0.27	10.81 ± 0.32	0.798	1	0.07		0.996818	1	0.05
179	100861042	MLX	20.44 ± 0.27	22.14 ± 0.23	19.8 ± 0.16	0.654	1	0.12		0.838359	1	-0.16
180	100861043	PSMC3IP	9.44 ± 0.39	10.08 ± 0.35	5.72 ± 0.12	0.846	1	0.09		0.202326	0.404652	-0.82
181	100861044	ZDHHC6	15.89 ± 0.29	15.64 ± 0.82	15.64 ± 0.4	0.936	1	-0.02		0.942863	1	0
182	100861046	MEPCE	15.13 ± 0.41	9.33 ± 0.14	10.23 ± 0.2	0.00038	0.00076	-0.7		0.886735	1	0.13
183	100861047	FAM204A	25.95 ± 2.04	27.91 ± 1.46	24.28 ± 0.54	0.674	1	0.1		0.6346	1	-0.2
184	100861048	AP4M1	7.2 ± 0.35	6.68 ± 0.1	8.81 ± 0.1	0.826	1	-0.11		0.677034	1	0.4
185	100861049	ZNF3	6.24 ± 0.31	7.25 ± 0.08	4.9 ± 0.16	0.349	0.698	0.22		0.609886	1	-0.56
186	100861053	HCFC1R1	55.74 ± 1.6	57.83 ± 1.19	66.66 ± 1.22	0.842	1	0.05		0.365506	0.731011	0.21
187	100861054	SNRNP25	179.8 ± 10.59	139.56 ± 2.21	181.46 ± 7.78	0.0511	0.1022	-0.37		9.30125e-05	0.000186	0.38
188	100861055	CLUAP1	4.77 ± 0.11	4.37 ± 0.07	4.11 ± 0.12	0.649	1	-0.13		1	1	-0.09
189	100861060	RAB40C	43.06 ± 2.97	59.32 ± 1.37	52.8 ± 0.35	0.011	0.022	0.46		0.557499	1	-0.17
190	100861062	LYRM1	6.99 ± 0.31	8.38 ± 0.12	8 ± 0.04	0.34	0.68	0.26		1	1	-0.07
191	100861063	GOT1	8.54 ± 0.33	18.29 ± 0.39	16.4 ± 0.67	0.00038	0.00076	1.1	UP	0.816131	1	-0.16
192	100861064	ZDHHC16	10.12 ± 0.32	9.63 ± 0.17	10.13 ± 0.34	0.795	1	-0.07		1	1	0.07
193	100861065	RPS15A	3882.02 ± 237.79	3910.82 ± 77.91	5445.68 ± 25.83	0.976	1	0.01		1.18896e-97	2.38e-97	0.48
194	100861066	ERLIN1	9.7 ± 0.03	15.08 ± 0.42	8.96 ± 0.18	0.00038	0.00076	0.64		0.113079	0.226159	-0.75
195	100861068	NOLC1	12.6 ± 0.62	35.13 ± 1.63	19.17 ± 0.92	0.00038	0.00076	1.48	UP	0.0015731	0.0031462	-0.87
196	100861069	GBF1	7.33 ± 0.13	9.87 ± 0.39	9.72 ± 0.36	0.0225	0.045	0.43		1	1	-0.02
197	100861071	AS3MT	3.23 ± 0.21	4.29 ± 0.06	4.26 ± 0.04	0.111	0.222	0.41		1	1	-0.01
198	100861073	DCTD	5.18 ± 0.02	5.24 ± 0.13	4.43 ± 0.19	0.962	1	0.02		0.909221	1	-0.24
199	100861074	ANKRD37	14.79 ± 1.52	5 ± 0.07	7.47 ± 0.23	0.00591	0.01182	-1.56	DN	0.559604	1	0.58
200	100861075	FRG1	31.37 ± 2.29	21.37 ± 1.04	20.27 ± 0.69	0.00493	0.00986	-0.55		0.85665	1	-0.08
201	100861076	RAB4A	1.26 ± 0.1	1.47 ± 0.06	1.53 ± 0.07	0.683	1	0.23		0.690566	1	0.06
202	100861077	CNOT7	28.11 ± 0.66	33.48 ± 0.71	31.93 ± 1.14	0.198	0.396	0.25		0.842549	1	-0.07
203	100861078	PPA1	236.17 ± 18.69	327.52 ± 4.2	391.39 ± 2.24	0.0202	0.0404	0.47		0.000622857	0.00124571	0.26
204	100861079	LRRC20	2.09 ± 0.05	2.13 ± 0.05	3.23 ± 0.04	0.958	1	0.02		0.422171	0.844342	0.6
205	100861080	SGPL1	12.98 ± 0.14	8.71 ± 0.23	11.87 ± 0.3	0.00299	0.00598	-0.58		0.613957	1	0.45
206	100861081	ASCC1	13.19 ± 0.05	6.72 ± 0.11	9.1 ± 0.34	0.00473	0.00946	-0.97		0.640771	1	0.44
207	100861082	MICU1	28.48 ± 0.55	22.14 ± 0.49	34.84 ± 0.96	0.0515	0.103	-0.36		0.0217083	0.0434166	0.65
208	100861083	ECD	14.59 ± 0.61	13.7 ± 0.2	11.31 ± 0.3	0.704	1	-0.09		0.629756	1	-0.28
209	100861084	SEC24C	26.15 ± 0.21	32.06 ± 0.98	35.45 ± 0.94	0.129	0.258	0.29		0.777385	1	0.15
210	100861086	WAPL	9.21 ± 0.15	12 ± 0.38	9.96 ± 0.11	0.0383	0.0766	0.38		0.743283	1	-0.27
211	100861087	MAPK8	2.07 ± 0.25	2.01 ± 0.12	1.76 ± 0.12	0.896	1	-0.04		1	1	-0.19
212	100861088	TOMM20	120.19 ± 1.2	116 ± 3.28	133.99 ± 1.36	0.829	1	-0.05		0.340358	0.680717	0.21
213	100861089	UBE2D1	7.19 ± 0.55	6.31 ± 0.31	5.07 ± 0.09	0.58	1	-0.19		0.702745	1	-0.32
214	100861090	CISD1	74.24 ± 5.22	105.48 ± 1.6	103.9 ± 2.6	0.0061	0.0122	0.51		1	1	-0.02
215	100861091	TCTN3	1.82 ± 0.14	2.75 ± 0.12	1.91 ± 0.11	0.073	0.146	0.6		0.422172	0.844343	-0.53
216	100861093	LEPROTL1	12.3 ± 0.77	18.01 ± 0.65	12.26 ± 0.5	0.00533	0.01066	0.55		0.193596	0.387191	-0.56
217	100861094	DCTN6	23.33 ± 0.52	26.43 ± 0.7	22.75 ± 0.8	0.421	0.842	0.18		0.62192	1	-0.22
218	100861095	MAK16	3.4 ± 0.16	7.86 ± 0.04	4.32 ± 0.08	0.00038	0.00076	1.21	UP	0.161855	0.323709	-0.86
219	100861098	UBXN8	12.58 ± 1	9.68 ± 0.33	13.94 ± 0.25	0.129	0.258	-0.38		0.293387	0.586773	0.53
220	100861099	VDAC3	49.74 ± 1.44	53.49 ± 0.55	57.65 ± 1.47	0.64	1	0.1		0.78795	1	0.11
221	100861101	HOOK3	6.74 ± 0.43	6.75 ± 0.21	5.02 ± 0.1	0.997	1	0		0.657914	1	-0.43
222	100861103	OXSM	20.29 ± 1.17	18.7 ± 0.51	23.81 ± 0.3	0.61	1	-0.12		0.365416	0.730832	0.35
223	100861104	LOC100861104	4.06 ± 0.19	5.53 ± 0.25	2.44 ± 0.14	0.0859	0.1718	0.44		1.64e-09	3.28e-09	-1.18	DN
224	100861105	GPR137B	6.66 ± 0.19	2.7 ± 0.02	3.93 ± 0.13	0.00038	0.00076	-1.3	DN	0.498305	0.996609	0.54
225	100861106	ARV1	12.1 ± 0.62	16.76 ± 0.08	14.36 ± 0.67	0.0314	0.0628	0.47		0.81292	1	-0.22
226	100861107	RHOBTB1	2.6 ± 0.09	1.34 ± 0.1	1.15 ± 0.08	0.000707	0.001414	-0.95		0.808253	1	-0.22
227	100861108	REEP3	11.95 ± 0.56	10.45 ± 0.2	11.04 ± 0.08	0.404	0.808	-0.19		0.923465	1	0.08
228	100861109	ZNF740	7.47 ± 0.29	5.8 ± 0.06	7.32 ± 0.11	0.134	0.268	-0.37		0.853714	1	0.34
229	100861111	SDHAF2	36.76 ± 1.4	39.05 ± 0.53	41.31 ± 0.69	0.704	1	0.09		0.920307	1	0.08
230	100861114	POLR2G	45.09 ± 2.07	62.32 ± 0.59	51.93 ± 0.91	0.0197	0.0394	0.47		0.295654	0.591307	-0.26
231	100861116	FKBP2	199.6 ± 22.56	252.01 ± 13.62	297.85 ± 15.2	0.0776	0.1552	0.34		0.00982707	0.0196541	0.24
232	100861117	PRDX5	351.05 ± 28.37	471.56 ± 2.2	537.41 ± 8.03	0.0348	0.0696	0.43		0.00209638	0.00419276	0.19
233	100861118	SNX15	10.23 ± 0.7	5.74 ± 0.3	8.41 ± 0.43	0.000707	0.001414	-0.83		0.458842	0.917683	0.55
234	100861120	TM7SF2	31.88 ± 0.58	44.71 ± 1.83	59.36 ± 0.83	0.0105	0.021	0.49		0.124275	0.24855	0.41
235	100861121	FRMD8	28.55 ± 1.66	19.37 ± 0.56	20.84 ± 0.54	0.00181	0.00362	-0.56		0.853714	1	0.11
236	100861123	OVOL1	30.78 ± 1.7	30.77 ± 1.16	41.9 ± 2.22	0.998	1	0		0.06538	0.13076	0.45
237	100861124	DRAP1	81.43 ± 3.94	95.7 ± 3.23	107.85 ± 6.21	0.241	0.482	0.23		0.588431	1	0.17
238	100861125	BANF1	239.76 ± 10.02	250.06 ± 1.02	284.49 ± 8.74	0.797	1	0.06		0.0318217	0.0636434	0.19
239	100861126	LOC100861126	55.3 ± 0.73	56.15 ± 1	79.4 ± 1.75	0.928	1	0.02		0.0033335	0.00666699	0.5
240	100861128	TMEM134	41.87 ± 2.75	59.72 ± 0.68	57.38 ± 0.79	0.00967	0.01934	0.51		0.879256	1	-0.06
241	100861130	DENR	13.2 ± 0.14	16.52 ± 0.73	11.1 ± 0.47	0.116	0.232	0.32		0.258014	0.516028	-0.57
242	100861133	EIF2S1	20.07 ± 0.69	32.66 ± 0.73	23.14 ± 0.86	0.0201	0.0402	0.7		0.0999143	0.199829	-0.5
243	100861134	METAP1D	4.34 ± 0.09	3.78 ± 0.13	6.38 ± 0.22	0.642	1	-0.2		0.398373	0.796747	0.76
244	100861135	LXN	1.04 ± 0.14	1.56 ± 0.23	0.93 ± 0.17	0.846	1	0.58		0.505043	1	-0.75
245	100861136	LOC100861136	2.37 ± 0.34	1.39 ± 0.13	0.95 ± 0.12	0.00181	0.00362	-0.77		0.6434	1	-0.55
246	100861138	RBMS1	8.95 ± 0.56	9.43 ± 0.37	9.9 ± 0.21	0.755	1	0.07		0.916411	1	0.07
247	100861140	ARL5A	5.01 ± 0.45	4.62 ± 0.14	4.72 ± 0.13	0.604	1	-0.12		1	1	0.03
248	100861142	IWS1	8.64 ± 0.34	10.75 ± 0.41	8.92 ± 0.4	0.124	0.248	0.31		0.641306	1	-0.27
249	100861144	INSIG2	11.55 ± 0.57	8.87 ± 0.5	8.75 ± 0.73	0.227	0.454	-0.38		0.942863	1	-0.02
250	100861145	RALB	21.83 ± 0.6	27.48 ± 0.15	22.07 ± 0.37	0.0821	0.1642	0.33		0.469759	0.939519	-0.32
251	100861146	ORMDL1	5.88 ± 0.4	8.52 ± 0.35	3.94 ± 0.29	0.0229	0.0458	0.54		0.000141386	0.000282772	-1.11	DN
252	100861147	SDPR	4.85 ± 0.86	8.89 ± 1.11	2.19 ± 0.46	0.00038	0.00076	0.87		0.00631541	0.0126308	-2.02	DN
253	100861149	CLK1	28.68 ± 2.25	16.56 ± 0.88	25.82 ± 1.96	0.00038	0.00076	-0.79		0.0811843	0.162369	0.64
254	100861150	PPIL3	6.84 ± 0.42	5.77 ± 0.13	5.59 ± 0.16	0.477	0.954	-0.24		1	1	-0.05
255	100861151	STRADB	3.94 ± 0.15	3.01 ± 0.06	3.32 ± 0.19	0.219	0.438	-0.39		1	1	0.14
256	100861152	FAM126B	2.28 ± 0.31	3.34 ± 0.12	2.43 ± 0.11	0.00687	0.01374	0.55		0.6445	1	-0.46
257	100861154	CCNYL1	5.64 ± 0.18	8.1 ± 0.09	5.85 ± 0.17	0.012	0.024	0.52		0.648463	1	-0.47
258	100861156	CALCRL	1.68 ± 0.42	1.69 ± 0.29	1.1 ± 0.38	0.995	1	0		0.40028	0.80056	-0.62
259	100861157	ABCB6	33.28 ± 1.18	30.39 ± 0.95	38.4 ± 1.13	0.539	1	-0.13		0.21636	0.432721	0.34
260	100861158	LOC100861158	6.47 ± 0.16	11.17 ± 0.24	9.42 ± 0.16	0.00299	0.00598	0.79		0.734146	1	-0.25
261	100861159	DNAJB2	17.69 ± 0.27	18.3 ± 0.35	15.3 ± 0.18	0.843	1	0.05		0.663614	1	-0.26
262	100861160	WDFY1	9.35 ± 0.43	11.51 ± 0.15	10.57 ± 0.12	0.127	0.254	0.3		0.996818	1	-0.12
263	100861165	IGF1R	10.11 ± 0.41	5.72 ± 0.38	9.02 ± 0.53	0.00038	0.00076	-0.82		0.425195	0.850389	0.66
264	100861171	MMP14	68.06 ± 1.59	24.12 ± 1.09	44.56 ± 2.35	0.00038	0.00076	-1.5	DN	0.000113994	0.000227988	0.89
265	100861196	SOD1	309.09 ± 13.66	478.82 ± 11.55	445.3 ± 12.49	0.00038	0.00076	0.63		0.337888	0.675777	-0.1
266	100861214	INSL3	8.78 ± 0.51	4.97 ± 0.33	16.15 ± 0.8	0.0174	0.0348	-0.82		7.01638e-05	0.0001404	1.7	UP
267	100861215	HMBS	10.61 ± 0.82	14.82 ± 0.27	13.98 ± 0.56	0.0224	0.0448	0.48		0.962867	1	-0.08
268	100861219	SEPP1	114.95 ± 1	95.2 ± 2.39	111.77 ± 2.4	0.171	0.342	-0.27		0.32092	0.64184	0.23
269	100861223	CD34	9.64 ± 1.77	8.01 ± 0.8	2.76 ± 0.41	0.256	0.512	-0.27		8.18e-72	1.636e-71	-1.54	DN
270	100861224	ACACA	1.88 ± 0.08	3.45 ± 0.21	1.86 ± 0.09	0.00038	0.00076	0.88		0.346224	0.692448	-0.89
271	100861225	DGAT1	16.36 ± 0.39	15.79 ± 0.28	19.84 ± 0.51	0.867	1	-0.05		0.524655	1	0.33
272	100861238	HSPD1	160.02 ± 8.23	227.4 ± 1.71	207.76 ± 1.74	0.0159	0.0318	0.51		0.337943	0.675886	-0.13
273	100861241	BMPR1A	6.62 ± 0.42	5.16 ± 0.29	4.89 ± 0.03	0.0825	0.165	-0.36		1	1	-0.08
274	100861244	PLIN3	50.72 ± 3.8	59.08 ± 1.37	47.84 ± 0.92	0.272	0.544	0.22		0.246928	0.493856	-0.3
275	100861245	PLIN2	117.16 ± 5.89	56.53 ± 1.95	100.74 ± 2.52	0.00038	0.00076	-1.05	DN	4.91641e-08	9.84e-08	0.83
276	100861246	GABARAPL2	217.57 ± 8.5	159.68 ± 1.33	200.26 ± 6.99	0.0186	0.0372	-0.45		0.00784418	0.0156884	0.33
277	100861247	TNNT3	165.23 ± 16.16	89.36 ± 5.51	166.23 ± 14.54	0.00038	0.00076	-0.89		1.18308e-15	2.36e-15	0.9
278	100861250	INHBB	2.76 ± 0.23	1.16 ± 0.24	1.18 ± 0.19	0.0182	0.0364	-1.25	DN	1	1	0.03
279	100861255	DIMT1	5.18 ± 0.06	9.89 ± 0.29	4.56 ± 0.07	0.00101	0.00202	0.93		0.0069433	0.0138866	-1.12	DN
280	100861263	LOC100861263	304.07 ± 21.22	272.46 ± 4.03	317.47 ± 12.3	0.522	1	-0.16		0.00477068	0.00954135	0.22
281	100861264	MRS2	6.44 ± 0.26	9.02 ± 0.19	7.75 ± 0.07	0.0167	0.0334	0.49		0.876278	1	-0.22
282	100861265	GTPBP2	9.54 ± 0.17	7.96 ± 0.22	10.59 ± 0.27	0.223	0.446	-0.26		0.627133	1	0.41
283	100861266	METTL9	63.67 ± 3.16	68.97 ± 1.08	67.18 ± 0.78	0.596	1	0.12		0.944653	1	-0.04
284	100861267	PMS2	3.95 ± 0.12	4.43 ± 0.21	3.95 ± 0.15	0.527	1	0.17		0.942863	1	-0.16
285	100861268	PI4K2A	7.42 ± 0.13	8.84 ± 0.37	8.94 ± 0.26	0.229	0.458	0.25		0.972961	1	0.01
286	100861269	PDLIM3	25.68 ± 8.01	37.81 ± 4.95	3.89 ± 0.15	0.0138	0.0276	0.56		1.53519e-16	3.08e-16	-3.28	DN
287	100861270	GPAT4	16.48 ± 0.09	19.95 ± 0.48	18.75 ± 0.27	0.182	0.364	0.28		0.890824	1	-0.09
288	100861271	TMEM138	2.85 ± 0.15	3.92 ± 0.21	2.57 ± 0.06	0.242	0.484	0.46		0.498305	0.99661	-0.61
289	100861273	EPB41L5	12.22 ± 0.26	8.85 ± 0.33	11.06 ± 0.07	0.0197	0.0394	-0.47		0.766179	1	0.32
290	100861277	IGF2	5.61 ± 0.53	4.37 ± 0.38	4.52 ± 0.2	0.31	0.62	-0.36		1	1	0.05
291	100861278	SLC16A1	165.31 ± 9.12	270.07 ± 5.89	413.36 ± 6	0.00629	0.01258	0.71		1.18558e-20	2.38e-20	0.61
292	100861279	LOC100861279	9.4 ± 1.11	24 ± 1.18	6.04 ± 0.59	0.0023	0.0046	1.35	UP	2.99123e-07	5.98e-07	-1.99	DN
293	100861282	ELOVL5	1.54 ± 0.17	1.44 ± 0.1	1.29 ± 0.05	0.821	1	-0.1		0.808253	1	-0.16
294	100861284	NDUFA4	66.23 ± 2.95	97.1 ± 3.4	65.44 ± 2.56	0.00299	0.00598	0.55		2.65996e-05	5.32e-05	-0.57
295	100861286	FASN	14.63 ± 0.71	13.81 ± 0.66	14.98 ± 0.9	0.711	1	-0.08		0.962129	1	0.12
296	100861294	DNMT1	5.2 ± 0.27	6.21 ± 0.13	5.61 ± 0.26	0.219	0.438	0.26		0.990335	1	-0.15
297	100861297	RPS6KB1	9.4 ± 0.43	10.52 ± 0.38	7.87 ± 0.19	0.487	0.974	0.16		0.552858	1	-0.42
298	100861300	TGFBR2	15.81 ± 0.67	11.37 ± 0.03	12.37 ± 0.16	0.0102	0.0204	-0.48		0.874294	1	0.12
299	100861302	HNRNPK	160.33 ± 0.38	160.12 ± 2.3	154.54 ± 0.47	0.995	1	0		0.839264	1	-0.05
300	100861303	CSF1R	5.88 ± 0.27	1.86 ± 0.05	2.35 ± 0.03	0.00038	0.00076	-1.66	DN	1	1	0.34
301	100861304	CAST	56.97 ± 0.7	59.66 ± 1.33	63.17 ± 2.37	0.789	1	0.07		0.769692	1	0.08
302	100861305	RORA	4.59 ± 0.26	3.18 ± 0.08	5.35 ± 0.06	0.0965	0.193	-0.53		0.433503	0.867006	0.75
303	100861308	RHEB	82.77 ± 1.1	109.57 ± 3.22	88.39 ± 1.66	0.044	0.088	0.4		0.0685584	0.137117	-0.31
304	100861313	CAPN1	64.11 ± 2.81	42.2 ± 1.52	59.36 ± 2.63	0.000707	0.001414	-0.6		0.0176633	0.0353265	0.49
305	100861314	MACROD1	80.31 ± 7.68	81.77 ± 2.74	124.84 ± 9.4	0.918	1	0.03		1.66367e-07	3.32e-07	0.61
306	100861316	SLC39A1	25.71 ± 0.62	20.09 ± 0.27	21.41 ± 0.42	0.0747	0.1494	-0.36		0.875499	1	0.09
307	100861318	PRLR	3.42 ± 0.14	1.64 ± 0.02	3.97 ± 0.2	0.00038	0.00076	-1.06	DN	9.71e-60	1.942e-59	1.28	UP
308	100861319	METTL3	7.37 ± 0.13	9.06 ± 0.15	7.81 ± 0.26	0.194	0.388	0.3		0.844218	1	-0.21
309	100861320	OSGEP	6.08 ± 0.02	8.34 ± 0.41	5.9 ± 0.04	0.0815	0.163	0.46		0.516064	1	-0.5
310	100861321	VPS18	7.24 ± 0.34	7.47 ± 0.33	7.45 ± 0.15	0.86	1	0.05		0.966937	1	0
311	100861322	LSM2	20.17 ± 0.89	27.69 ± 1.04	35.99 ± 0.27	0.0867	0.1734	0.46		0.195541	0.391082	0.38
312	100861323	NFKBIL1	24.97 ± 2.31	13.54 ± 0.41	18.56 ± 0.47	0.00038	0.00076	-0.88		0.293387	0.586773	0.45
313	100861324	GTF2H4	6.51 ± 0.14	6.71 ± 0.2	6.19 ± 0.07	0.89	1	0.04		0.853714	1	-0.12
314	100861326	GCNT2	4.71 ± 0.2	6.36 ± 0.07	7.83 ± 0.41	0.0504	0.1008	0.43		0.608113	1	0.3
315	100861328	MED20	8 ± 0.11	7.3 ± 0.12	6.23 ± 0.21	0.739	1	-0.13		0.853714	1	-0.23
316	100861329	TMEM63B	23.28 ± 0.48	14.74 ± 0.64	23.25 ± 0.75	0.0283	0.0566	-0.66		0.0696972	0.139394	0.66
317	100861330	INO80C	13.41 ± 0.77	21.16 ± 0.09	19.6 ± 0.39	0.00706	0.01412	0.66		0.890824	1	-0.11
318	100861334	SEC11C	33.94 ± 2.27	56.05 ± 0.41	41.28 ± 2.26	0.00101	0.00202	0.72		0.0496205	0.099241	-0.44
319	100861336	NSMCE1	99.32 ± 5.04	96.8 ± 0.89	123.63 ± 4.68	0.879	1	-0.04		0.0247883	0.0495765	0.35
320	100861337	PHKG2	5.24 ± 0.19	6.25 ± 0.02	5.08 ± 0.17	0.384	0.768	0.26		0.838359	1	-0.3
321	100861338	LOC100861338	5.36 ± 0.41	6.25 ± 0.19	9.86 ± 0.69	0.563	1	0.22		0.290695	0.581389	0.66
322	100861340	FIS1	128.36 ± 9.51	115.66 ± 3.89	136.32 ± 4.42	0.471	0.942	-0.15		0.163749	0.327499	0.24
323	100861341	PDCD4	35.08 ± 1.16	31.9 ± 0.2	35.86 ± 0.93	0.635	1	-0.14		0.652267	1	0.17
324	100861343	CASP7	1.83 ± 0.07	1.1 ± 0.07	0.8 ± 0.07	0.0469	0.0938	-0.73		1	1	-0.46
325	100861345	POLR3K	25.29 ± 1.38	34.42 ± 0.61	34.38 ± 0.8	0.0491	0.0982	0.44		0.986068	1	0
326	100861346	SNRPE	55.04 ± 4.6	76.81 ± 1.85	62.76 ± 1.18	0.0216	0.0432	0.48		0.250357	0.500714	-0.29
327	100861348	ACP1	46.21 ± 1.2	52.01 ± 0.32	51.92 ± 0.17	0.417	0.834	0.17		1	1	0
328	100861349	NDUFB8	290.76 ± 23.99	246.39 ± 3.84	303.54 ± 4.79	0.235	0.47	-0.24		0.00102823	0.00205646	0.3
329	100861350	POLL	3.28 ± 0.09	3.4 ± 0.1	3.23 ± 0.12	0.877	1	0.05		0.885708	1	-0.08
330	100861351	SLC25A4	41.55 ± 0.99	52.53 ± 2.69	37.89 ± 0.6	0.0783	0.1566	0.34		0.0262636	0.0525272	-0.47
331	100861353	EIF4EBP2	48.06 ± 2.8	44.92 ± 2.8	66.03 ± 2.28	0.658	1	-0.1		0.00358609	0.00717219	0.56
332	100861354	DNAJB12	10.95 ± 0.42	7.97 ± 0.27	9.81 ± 0.37	0.0492	0.0984	-0.46		0.702745	1	0.3
333	100861355	CHCHD1	68.34 ± 7.1	76.34 ± 2.63	74.32 ± 2.09	0.483	0.966	0.16		0.919943	1	-0.04
334	100861357	PCGF5	10.06 ± 0.49	9.13 ± 0.3	8.24 ± 0.31	0.505	1	-0.14		0.878756	1	-0.15
335	100861358	GTF2E2	33.07 ± 1.55	48.13 ± 0.76	45.21 ± 1.1	0.00365	0.0073	0.54		0.848423	1	-0.09
336	100861359	TM2D2	15.53 ± 0.77	15.45 ± 0.58	14.19 ± 0.33	0.98	1	-0.01		0.844218	1	-0.12
337	100861360	NKIRAS1	1.14 ± 0.06	1.89 ± 0.11	2.2 ± 0.08	0.248	0.496	0.72		1	1	0.22
338	100861361	CDK1	1.65 ± 0.09	5 ± 0.27	4.09 ± 0.35	0.00038	0.00076	1.6	UP	0.823305	1	-0.29
339	100861362	TSG101	43.68 ± 1.03	50.07 ± 0.91	58.18 ± 0.81	0.337	0.674	0.2		0.407958	0.815917	0.22
340	100861363	MTA2	17.18 ± 0.47	26.24 ± 0.63	24.39 ± 0.6	0.00038	0.00076	0.61		0.838359	1	-0.11
341	100861365	PPP2R5B	4.7 ± 0.11	4.47 ± 0.12	4.59 ± 0.2	0.808	1	-0.08		1	1	0.04
342	100861366	KAT5	25.65 ± 1.16	26.75 ± 0.28	28.86 ± 0.69	0.799	1	0.06		0.831356	1	0.11
343	100861368	PPP6R3	11.48 ± 0.15	13.02 ± 0.28	12.55 ± 0.26	0.377	0.754	0.18		0.98457	1	-0.05
344	100861369	CLNS1A	13.96 ± 0.43	20.7 ± 0.18	15.26 ± 0.22	0.00493	0.00986	0.57		0.309781	0.619563	-0.44
345	100861370	HAT1	12.3 ± 0.56	17.28 ± 0.44	12.76 ± 0.71	0.0169	0.0338	0.49		0.475334	0.950669	-0.44
346	100861372	UBXN4	45.69 ± 2.59	38.25 ± 0.66	39.15 ± 0.77	0.189	0.378	-0.26		0.995844	1	0.03
347	100861373	CYFIP1	22.03 ± 0.19	21.41 ± 0.52	20.43 ± 0.41	0.867	1	-0.04		0.894267	1	-0.07
348	100861375	NIF3L1	14.6 ± 0.73	11.81 ± 0.35	9.92 ± 0.38	0.186	0.372	-0.31		0.784206	1	-0.25
349	100861376	NDUFS1	49.86 ± 1.75	45.74 ± 0.83	55.56 ± 1.48	0.586	1	-0.12		0.323443	0.646887	0.28
350	100861377	PNKD	129.69 ± 11.68	94.81 ± 3.86	147.72 ± 5.29	0.519	1	-0.45		1.10194e-08	2.2e-08	0.64
351	100861378	FARSB	33.87 ± 2.37	49.11 ± 1.1	39.65 ± 0.12	0.00277	0.00554	0.54		0.20914	0.41828	-0.31
352	100861379	HRSP12	26.87 ± 1.51	30.97 ± 0.19	25.72 ± 1.56	0.355	0.71	0.21		0.433503	0.867006	-0.27
353	100861387	ALAS1	84.85 ± 3.26	38.96 ± 1.36	106.51 ± 5.61	0.00038	0.00076	-1.12	DN	1.35682e-22	2.72e-22	1.45	UP
354	100861391	HIF1A	22.99 ± 0.94	21.6 ± 0.62	18.27 ± 0.5	0.692	1	-0.09		0.614695	1	-0.24
355	100861392	ADIPOR1	32.96 ± 1.58	33.37 ± 1.1	37.6 ± 0.28	0.947	1	0.02		0.614323	1	0.17
356	100861393	PPARA	9.08 ± 0.33	8.63 ± 0.59	13.76 ± 0.71	0.797	1	-0.07		0.258014	0.516028	0.67
357	100861394	MFGE8	315.76 ± 8.44	577.14 ± 20.23	506.65 ± 34.07	0.00038	0.00076	0.87		0.00031507	0.00063014	-0.19
358	100861396	COPZ1	44.2 ± 0.94	50.54 ± 0.98	54.77 ± 0.97	0.33	0.66	0.19		0.722977	1	0.12
359	100861399	C10H15orf57	21.23 ± 1.12	17.42 ± 0.29	16.55 ± 0.24	0.172	0.344	-0.29		0.966937	1	-0.07
360	100861400	TXNL4A	42.49 ± 2.12	54.86 ± 0.41	52.91 ± 1.9	0.0783	0.1566	0.37		0.888035	1	-0.05
361	100861401	UBL5	289.98 ± 9.77	327.6 ± 5.31	340.46 ± 6.02	0.38	0.76	0.18		0.700713	1	0.06
362	100861576	SOX2	174.35 ± 13.32	127.08 ± 5	204.08 ± 7.9	0.0115	0.023	-0.46		3.71128e-12	7.42e-12	0.68
363	100861577	NPR2	2.88 ± 0.24	1.42 ± 0.07	1.44 ± 0.06	0.00156	0.00312	-1.02	DN	1	1	0.02
364	100861579	BTG1	144.04 ± 3.21	38.38 ± 2.51	97.8 ± 0.75	0.00038	0.00076	-1.91	DN	1.06251e-16	2.12e-16	1.35	UP
365	102168200	PAXBP1	3.5 ± 0.43	6.69 ± 0.23	2.63 ± 0.14	0.00038	0.00076	0.93		0.00744032	0.0148806	-1.35	DN
366	102168201	SPHK1	2.33 ± 0.13	1.65 ± 0.1	1.47 ± 0.02	0.166	0.332	-0.5		0.505043	1	-0.16
367	102168204	UMPS	14.36 ± 0.43	38.42 ± 0.53	19.76 ± 0.23	0.00038	0.00076	1.42	UP	0.000177808	0.000355616	-0.96
368	102168206	FXR1	44.42 ± 2.44	34.53 ± 0.51	41.96 ± 0.69	0.0596	0.1192	-0.36		0.360512	0.721024	0.28
369	102168207	LOC102168207	11.42 ± 0.25	12.81 ± 0.58	13.81 ± 0.62	0.519	1	0.17		0.85757	1	0.11
370	102168208	LOC102168208	49.82 ± 3.03	38.54 ± 1.08	49.29 ± 1.35	0.0478	0.0956	-0.37		0.149848	0.299695	0.35
371	102168210	C21H15orf39	2.53 ± 0.08	3.35 ± 0.15	3.1 ± 0.26	0.105	0.21	0.4		0.885708	1	-0.11
372	102168216	NDUFB3	190.65 ± 16.63	196.97 ± 5.84	173.13 ± 5.15	0.844	1	0.05		0.0963799	0.19276	-0.19
373	102168217	CNBP	228.4 ± 5.18	271.48 ± 1.88	234.63 ± 0.79	0.252	0.504	0.25		0.0439807	0.0879615	-0.21
374	102168219	PTP4A2	17.41 ± 0.26	26.16 ± 0.61	18.65 ± 0.69	0.00038	0.00076	0.59		0.210884	0.421768	-0.49
375	102168223	SNX27	5.74 ± 0.19	4.05 ± 0.02	4.42 ± 0.02	0.0168	0.0336	-0.5		1	1	0.13
376	102168224	THOC1	5.56 ± 0.12	8.22 ± 0.27	4.22 ± 0.19	0.00895	0.0179	0.56		0.161855	0.323709	-0.96
377	102168225	MYO5B	28.14 ± 1.67	34.76 ± 1.91	48.87 ± 2.52	0.128	0.256	0.3		0.0282769	0.0565537	0.49
378	102168226	LOC102168226	12.14 ± 0.88	16.78 ± 1.54	16.28 ± 2.03	0.337	0.674	0.47		0.886735	1	-0.04
379	102168227	GLMN	2.68 ± 0.2	2.19 ± 0.14	1.88 ± 0.06	0.388	0.776	-0.3		1	1	-0.22
380	102168229	EEF2K	12.6 ± 0.24	7.84 ± 0.13	8.27 ± 0.36	0.00038	0.00076	-0.68		0.994112	1	0.08
381	102168230	AZGP1	16.72 ± 1.93	20.07 ± 0.3	28.98 ± 0.85	0.235	0.47	0.26		0.0947685	0.189537	0.53
382	102168231	ZNF768	12.53 ± 0.91	9.16 ± 0.6	9.24 ± 0.35	0.0286	0.0572	-0.45		0.942863	1	0.01
383	102168232	PABPC4	43.47 ± 1.84	34.75 ± 0.28	41.56 ± 2.22	0.0921	0.1842	-0.32		0.452126	0.904251	0.26
384	102168233	SH3BP4	2.93 ± 0.05	3.42 ± 0.11	3.27 ± 0.15	0.364	0.728	0.22		0.885708	1	-0.06
385	102168237	HMGXB4	2.11 ± 0.11	1.78 ± 0.06	1.21 ± 0.05	0.442	0.884	-0.24		0.298903	0.597806	-0.56
386	102168239	LOC102168239	3.95 ± 0.08	6.56 ± 0.11	3.5 ± 0.06	0.00038	0.00076	0.73		0.302482	0.604964	-0.91
387	102168241	TCEAL4	44.49 ± 3.71	56.9 ± 2.88	38.94 ± 1.24	0.0539	0.1078	0.35		0.0125072	0.0250144	-0.55
388	102168243	WDR44	2.22 ± 0.12	2.33 ± 0.06	1.67 ± 0.06	0.829	1	0.07		1	1	-0.49
389	102168247	MFSD7	6.66 ± 0.19	4.26 ± 0.08	4.74 ± 0.13	0.0169	0.0338	-0.64		0.816131	1	0.15
390	102168251	ZNF557	1.58 ± 0.08	1.49 ± 0.06	1.07 ± 0.06	0.827	1	-0.08		0.6434	1	-0.48
391	102168257	C8H9orf72	3.81 ± 0.12	4.01 ± 0.11	3.41 ± 0.27	0.802	1	0.07		0.986068	1	-0.23
392	102168258	ECM2	2.33 ± 0.33	2.07 ± 0.16	1.45 ± 0.18	0.807	1	-0.17		0.706212	1	-0.51
393	102168265	LRRC57	5.52 ± 0.27	6.27 ± 0.14	5.18 ± 0.11	0.533	1	0.18		0.838359	1	-0.27
394	102168266	DPH6	7.48 ± 0.49	7.33 ± 0.49	8.24 ± 0.42	0.94	1	-0.03		0.89852	1	0.17
395	102168267	B2M	136.61 ± 2.76	97 ± 5.91	73.2 ± 4.34	0.0107	0.0214	-0.49		0.0170004	0.0340007	-0.41
396	102168269	LBH	38.02 ± 0.74	87 ± 2.25	73.75 ± 0.38	0.00038	0.00076	1.19	UP	0.198478	0.396956	-0.24
397	102168270	LOC102168270	12.47 ± 0.6	9.29 ± 0.38	7.22 ± 0.19	0.0251	0.0502	-0.43		0.640771	1	-0.36
398	102168273	NUP58	8.84 ± 0.15	12.42 ± 0.19	10.91 ± 0.12	0.00801	0.01602	0.49		0.846771	1	-0.19
399	102168275	GGACT	4.62 ± 0.05	3.68 ± 0.16	4.06 ± 0.06	0.361	0.722	-0.33		0.986068	1	0.14
400	102168276	VPS28	55.56 ± 1.34	53.9 ± 1.05	66.57 ± 1.38	0.849	1	-0.04		0.213597	0.427194	0.3
401	102168281	CPSF3L	28.52 ± 1.69	29.32 ± 1	37.65 ± 2.13	0.869	1	0.04		0.296463	0.592926	0.36
402	102168282	TTLL10	1.82 ± 0.07	1.75 ± 0.13	2.07 ± 0.11	0.896	1	-0.06		1	1	0.24
403	102168283	ZCCHC8	2.57 ± 0.13	2.07 ± 0.03	1.75 ± 0.04	0.704	1	-0.31		1	1	-0.25
404	102168286	TBC1D10A	17.4 ± 0.77	15.97 ± 0.65	17.06 ± 0.31	0.604	1	-0.12		0.966937	1	0.1
405	102168287	MMP15	17.53 ± 0.67	11.07 ± 0.18	23.2 ± 0.82	0.00038	0.00076	-0.66		0.00204597	0.00409194	1.07	UP
406	102168290	CCDC61	9.16 ± 0.41	10.61 ± 0.18	10.18 ± 0.51	0.414	0.828	0.21		0.890824	1	-0.06
407	102168292	MYO19	3.98 ± 0.2	7.53 ± 0.27	5.53 ± 0.06	0.00038	0.00076	0.92		0.53911	1	-0.45
408	102168293	ATP5G1	345.22 ± 32.97	366.87 ± 7.6	484 ± 28.61	0.705	1	0.09		1.69285e-10	3.38e-10	0.4
409	102168294	KRT10	0.81 ± 0.06	1.72 ± 0.22	1.39 ± 0.06	0.0483	0.0966	1.08		0.536395	1	-0.3
410	102168295	AOC3	3.43 ± 0.96	4.01 ± 0.54	3.92 ± 0.16	0.436	0.872	0.22		0.986068	1	-0.03
411	102168297	SIRT7	10.34 ± 0.28	10.09 ± 0.1	13.65 ± 0.54	0.914	1	-0.03		0.430687	0.861374	0.44
412	102168299	RCAN1	23.14 ± 0.77	17.97 ± 0.81	26.13 ± 1.56	0.0561	0.1122	-0.36		0.161362	0.322723	0.54
413	102168300	ARHGAP27	11.02 ± 0.27	8.94 ± 0.31	7.92 ± 0.24	0.12	0.24	-0.3		0.844218	1	-0.17
414	102168301	TPRG1	22.36 ± 0.94	12.48 ± 0.46	12.61 ± 0.9	0.00038	0.00076	-0.84		1	1	0.01
415	102168311	LOC102168311	5.89 ± 0.68	7.56 ± 0.65	7.74 ± 0.39	0.415	0.83	0.36		0.994112	1	0.04
416	102168315	SNN	45.76 ± 1.69	60.84 ± 2.37	62.79 ± 0.62	0.037	0.074	0.41		1	1	0.05
417	102168317	FGGY	6.22 ± 0.51	5.28 ± 0.25	6.53 ± 0.47	0.393	0.786	-0.24		0.754907	1	0.31
418	102168318	ROGDI	1.78 ± 0.26	1.43 ± 0.13	1.26 ± 0.05	0.54	1	-0.32		1	1	-0.18
419	102168319	IPO13	12.6 ± 0.1	15.36 ± 0.35	14.57 ± 0.41	0.141	0.282	0.29		0.941225	1	-0.08
420	102168320	CHST12	2.3 ± 0.15	3.79 ± 0.05	3.49 ± 0.09	0.0268	0.0536	0.72		0.941225	1	-0.12
421	102168324	SFXN4	4.2 ± 0.1	5.12 ± 0.16	6.43 ± 0.21	0.433	0.866	0.28		0.702745	1	0.33
422	102168326	INTS10	9.41 ± 0.24	10.09 ± 0.19	10.05 ± 0.44	0.685	1	0.1		0.995997	1	-0.01
423	102168327	LOC102168327	27.25 ± 2.37	20.44 ± 0.75	20.29 ± 0.53	0.0856	0.1712	-0.42		1	1	-0.01
424	102168329	LOC102168329	5.98 ± 0.34	7.23 ± 0.39	5.66 ± 0.11	0.437	0.874	0.27		0.784206	1	-0.35
425	102168330	CNPY2	75.46 ± 5.91	74.44 ± 0.29	84.55 ± 1.91	0.949	1	-0.02		0.487687	0.975374	0.18
426	102168332	CTTN	92.41 ± 2.59	116.57 ± 4.06	108.32 ± 3.52	0.1	0.2	0.34		0.483231	0.966462	-0.11
427	102168338	KXD1	42.87 ± 1.3	45.24 ± 1.18	47.23 ± 2.13	0.731	1	0.08		0.838359	1	0.06
428	102168340	RABL2B	1.84 ± 0.07	1.39 ± 0.06	1.81 ± 0.11	0.321	0.642	-0.4		0.422997	0.845993	0.38
429	102168345	XRCC4	2.88 ± 0.22	1.94 ± 0.12	1.9 ± 0.15	0.124	0.248	-0.57		1	1	-0.03
430	102168349	UBAP2	9.65 ± 0.13	12.04 ± 0.43	13 ± 0.5	0.0974	0.1948	0.32		0.957754	1	0.11
431	102168350	RTN4IP1	8.05 ± 0.68	12.32 ± 0.13	13.53 ± 0.19	0.0563	0.1126	0.61		0.855471	1	0.13
432	102168352	EMC9	13.73 ± 1.42	17.11 ± 0.6	15.24 ± 0.6	0.624	1	0.32		0.855127	1	-0.17
433	102168353	PSMA3	93.66 ± 3.6	115.86 ± 2.72	96.17 ± 4.42	0.111	0.222	0.31		0.0803985	0.160797	-0.27
434	102168355	CIPC	13.61 ± 0.14	11.75 ± 0.36	19.81 ± 0.28	0.288	0.576	-0.21		0.0608422	0.121684	0.75
435	102168359	CENPO	3.31 ± 0.28	3.98 ± 0.2	2.95 ± 0.19	0.606	1	0.26		0.583208	1	-0.43
436	102168360	NUP188	4.53 ± 0.08	5.42 ± 0.15	4.84 ± 0.1	0.279	0.558	0.26		0.988496	1	-0.17
437	102168366	MTDH	18.55 ± 0.51	25.01 ± 0.34	18.68 ± 0.64	0.0202	0.0404	0.43		0.307544	0.615088	-0.42
438	102168371	LMO2	5.41 ± 0.84	3.4 ± 0.39	2.57 ± 0.21	0.0469	0.0938	-0.67		0.316556	0.633112	-0.4
439	102168373	ATP1B1	12.21 ± 0.28	6.72 ± 0.17	18.67 ± 0.25	0.00277	0.00554	-0.86		0.000304473	0.000608946	1.47	UP
440	102168374	PLOD1	7.07 ± 0.07	4.27 ± 0.18	4.61 ± 0.2	0.00101	0.00202	-0.73		0.89852	1	0.11
441	102168376	LAMB3	16.01 ± 0.91	12.22 ± 0.59	21.08 ± 1.52	0.0415	0.083	-0.39		0.0347206	0.0694411	0.79
442	102168379	RSPRY1	4.38 ± 0.14	4.31 ± 0.04	4.29 ± 0.11	0.935	1	-0.02		1	1	-0.01
443	102168383	DKKL1	8.41 ± 0.93	16.56 ± 0.33	21.96 ± 0.91	0.00038	0.00076	0.98		0.333693	0.667385	0.41
444	102168385	VMP1	13.61 ± 0.26	18.79 ± 0.32	17.11 ± 0.53	0.0604	0.1208	0.47		0.905066	1	-0.14
445	102168386	SHMT1	48.1 ± 2.49	39.05 ± 1.1	71.35 ± 2.88	0.183	0.366	-0.3		1.06902e-06	2.14e-06	0.87
446	102168387	ARL13B	1.4 ± 0.08	1.05 ± 0.05	1.38 ± 0.08	0.386	0.772	-0.42		1	1	0.4
447	102168388	CPEB4	2.84 ± 0.32	2.68 ± 0.19	1.99 ± 0.1	0.751	1	-0.08		0.513173	1	-0.43
448	102168391	PIK3CA	4.56 ± 0.2	4.37 ± 0.05	4.87 ± 0.12	0.83	1	-0.06		0.816131	1	0.15
449	102168393	MPI	10.01 ± 0.46	10.13 ± 0.37	13.39 ± 0.48	0.952	1	0.02		0.46625	0.9325	0.4
450	102168395	LOC102168395	1 ± 0.09	2.66 ± 0.06	1.97 ± 0.09	0.00365	0.0073	1.41	UP	0.422172	0.844343	-0.43
451	102168396	ARF4	59.13 ± 0.28	87.78 ± 3.04	68.76 ± 1.63	0.00156	0.00312	0.57		0.0116729	0.0233458	-0.35
452	102168397	THOC7	25.75 ± 1.42	28.5 ± 1.02	24.82 ± 0.58	0.561	1	0.15		0.597503	1	-0.2
453	102168400	TMCO1	51.76 ± 3.74	57.94 ± 0.44	58.1 ± 1.98	0.437	0.874	0.16		0.986068	1	0
454	102168403	SSR1	56.29 ± 1.44	76.46 ± 1.25	72.42 ± 2.75	0.0169	0.0338	0.44		0.854418	1	-0.08
455	102168405	DCLRE1B	1.15 ± 0.05	1.92 ± 0.04	1.34 ± 0.05	0.0136	0.0272	0.74		0.298903	0.597806	-0.51
456	102168407	NDUFB10	410.74 ± 24.82	283.57 ± 4.96	423 ± 21.58	0.00181	0.00362	-0.53		3.96871e-18	7.94e-18	0.58
457	102168408	NRD1	12.46 ± 0.15	13.31 ± 0.24	13.01 ± 0.33	0.782	1	0.1		0.998856	1	-0.03
458	102168411	LOC102168411	14.24 ± 0.16	8.09 ± 0.29	12.82 ± 0.17	0.00038	0.00076	-0.82		0.199039	0.398078	0.66
459	102168413	CUEDC2	30.67 ± 1.32	27.47 ± 0.45	35.57 ± 1.71	0.474	0.948	-0.16		0.274309	0.548618	0.37
460	102168414	LOC102168414	4.05 ± 0.2	5.4 ± 0.19	9.57 ± 0.91	0.4	0.8	0.42		0.185066	0.370131	0.82
461	102168415	JAZF1	1.48 ± 0.33	1.67 ± 0.13	1.12 ± 0.06	0.658	1	0.18		0.505043	1	-0.58
462	102168420	ZNF777	7.34 ± 0.27	7.67 ± 0.22	8.95 ± 0.4	0.823	1	0.06		0.816131	1	0.22
463	102168421	LMBR1	4.51 ± 0.11	6.18 ± 0.1	5.27 ± 0.09	0.0362	0.0724	0.45		0.838359	1	-0.23
464	102168424	LOC102168424	690.39 ± 25.72	671.48 ± 6.55	1062.28 ± 19.58	0.912	1	-0.04		2.32073e-54	4.64e-54	0.66
465	102168426	SCAF11	8.96 ± 0.07	8.39 ± 0.03	7.66 ± 0.09	0.676	1	-0.09		1	1	-0.13
466	102168430	SMARCC2	12.29 ± 0.22	7.19 ± 0.3	9.59 ± 0.6	0.00038	0.00076	-0.77		0.442491	0.884981	0.41
467	102168431	LOC102168431	1.68 ± 0.38	2.88 ± 0.16	3.75 ± 0.35	0.263	0.526	0.78		0.676402	1	0.38
468	102168433	TPI1	165.11 ± 9.17	130.42 ± 1.7	170.32 ± 7.73	0.0832	0.1664	-0.34		0.000201271	0.000402542	0.39
469	102168435	WDR45	33.21 ± 1.11	29.24 ± 0.24	37.34 ± 0.89	0.368	0.736	-0.18		0.212109	0.424219	0.35
470	102168436	MAP3K15	26.73 ± 0.64	19.61 ± 0.4	23.61 ± 0.5	0.0168	0.0336	-0.45		0.531668	1	0.27
471	102168437	MRPL1	22.97 ± 1.5	24.59 ± 0.02	21.91 ± 1.03	0.668	1	0.1		0.705804	1	-0.17
472	102168438	WDR1	36.06 ± 0.85	43.38 ± 0.97	46.19 ± 0.85	0.171	0.342	0.27		0.911532	1	0.09
473	102168440	PGPEP1	4.01 ± 0.09	2.95 ± 0.02	2.89 ± 0.14	0.0965	0.193	-0.44		1	1	-0.03
474	102168446	NDFIP1	105.71 ± 2.13	100.14 ± 2.7	112.36 ± 2.56	0.737	1	-0.08		0.244227	0.488454	0.17
475	102168448	PALLD	31.13 ± 3.17	40.15 ± 2.19	40.15 ± 1.48	0.0598	0.1196	0.37		1	1	0
476	102168454	ZWILCH	1.22 ± 0.14	2.19 ± 0.02	1.51 ± 0.1	0.0211	0.0422	0.84		0.422997	0.845994	-0.54
477	102168456	KIAA0101	1.1 ± 0.03	4.25 ± 0.16	3.05 ± 0.17	0.00038	0.00076	1.96	UP	0.498305	0.99661	-0.48
478	102168460	VPS36	26 ± 0.34	25.08 ± 0.45	22.12 ± 0.58	0.822	1	-0.05		0.787992	1	-0.18
479	102168465	UCKL1	11.94 ± 0.39	9.19 ± 0.06	14.44 ± 1	0.12	0.24	-0.38		0.145737	0.291474	0.65
480	102168466	DYNLRB1	76.27 ± 3.14	97.84 ± 2.24	96.55 ± 4.85	0.062	0.124	0.36		0.987019	1	-0.02
481	102168468	ADNP	9.42 ± 0.55	5.89 ± 0.06	6.72 ± 0.22	0.00038	0.00076	-0.68		0.890824	1	0.19
482	102168469	MMP9	1.25 ± 0.14	4.47 ± 0.16	4.61 ± 0.16	0.00038	0.00076	1.84	UP	0.85757	1	0.04
483	102168470	C14H8orf76	3.75 ± 0.29	4.84 ± 0.09	4.87 ± 0.3	0.264	0.528	0.37		1	1	0.01
484	102168471	NDRG1	299.96 ± 6.9	85.38 ± 1.81	200.57 ± 5.39	0.00038	0.00076	-1.81	DN	2.51062e-29	5.02e-29	1.23	UP
485	102168480	PIGS	20.42 ± 0.24	15.88 ± 0.46	20.51 ± 0.41	0.0599	0.1198	-0.36		0.425136	0.850271	0.37
486	102168482	LOC102168482	6.7 ± 0.09	3.76 ± 0.1	4.71 ± 0.18	0.00038	0.00076	-0.83		0.816131	1	0.32
487	102168483	HOXB8	4.93 ± 0.95	2.9 ± 0.28	0.82 ± 0.29	0.289	0.578	-0.77		0.0519	0.104	-1.82
488	102168486	CPOX	14.29 ± 0.2	19.6 ± 0.56	18.5 ± 0.11	0.0157	0.0314	0.46		0.905218	1	-0.08
489	102168487	LOC102168487	12.44 ± 0.47	37.01 ± 0.68	20.65 ± 0.24	0.00038	0.00076	1.57	UP	0.00152798	0.00305596	-0.84
490	102168488	LIFR	2.72 ± 0.39	1.7 ± 0.11	2.23 ± 0.17	0.00038	0.00076	-0.68		0.854129	1	0.39
491	102168489	DAP	223.6 ± 9.76	234.23 ± 6.99	250.02 ± 7.62	0.803	1	0.07		0.722977	1	0.09
492	102168491	YBEY	8.38 ± 0.38	4.4 ± 0.26	5.47 ± 0.42	0.0313	0.0626	-0.93		0.722977	1	0.31
493	102168492	GOLGA5	10.02 ± 0.52	8.67 ± 0.16	8.15 ± 0.15	0.331	0.662	-0.21		0.941225	1	-0.09
494	102168493	SSFA2	17.36 ± 0.36	10.7 ± 0.25	13.66 ± 0.27	0.00038	0.00076	-0.7		0.590641	1	0.35
495	102168494	UBR3	6.46 ± 0.34	5.13 ± 0.05	5.75 ± 0.17	0.0891	0.1782	-0.33		0.914837	1	0.16
496	102168496	NME6	9.17 ± 0.53	9.79 ± 0.15	20.6 ± 0.37	0.79	1	0.09		9.19e-06	1.838e-05	1.07	UP
497	102168499	PPOX	13.84 ± 0.38	11.6 ± 0.13	11.83 ± 0.4	0.265	0.53	-0.26		0.99763	1	0.03
498	102168500	C23H6orf62	20.92 ± 1.28	18.37 ± 0.25	20.05 ± 0.36	0.377	0.754	-0.19		0.812475	1	0.13
499	102168502	EFNA1	31.13 ± 0.75	17.36 ± 0.25	26.57 ± 0.49	0.00038	0.00076	-0.84		0.0476869	0.0953738	0.61
500	102168505	COLEC12	4.13 ± 0.58	3.17 ± 0.41	3.87 ± 0.39	0.121	0.242	-0.38		0.940888	1	0.29
501	102168506	NUDT17	5.05 ± 0.23	1.53 ± 0.05	2.6 ± 0.15	0.00725	0.0145	-1.72	DN	0.40567	0.811341	0.76
502	102168507	MBD1	11.23 ± 0.51	11.56 ± 0.44	10.44 ± 0.38	0.886	1	0.04		0.895061	1	-0.15
503	102168510	LOC102168510	6.65 ± 0.27	5.49 ± 0.26	6.76 ± 0.29	0.205	0.41	-0.28		0.770893	1	0.3
504	102168511	PRR14	9.33 ± 0.22	9.92 ± 0.03	10.61 ± 0.2	0.732	1	0.09		0.890824	1	0.1
505	102168515	RASGRP2	0.86 ± 0.06	1.67 ± 0.09	1.76 ± 0.07	0.0267	0.0534	0.95		0.854129	1	0.08
506	102168516	FBXO7	4.17 ± 0.28	3.05 ± 0.04	3.3 ± 0.11	0.0629	0.1258	-0.45		0.885708	1	0.11
507	102168517	DUSP16	7.3 ± 0.07	4.25 ± 0.09	7.11 ± 0.24	0.00038	0.00076	-0.78		0.368729	0.737458	0.74
508	102168519	FAM114A1	5.41 ± 0.44	5.86 ± 0.16	3.8 ± 0.04	0.656	1	0.12		0.557499	1	-0.63
509	102168520	CDK16	9.91 ± 0.16	11.11 ± 0.17	12.82 ± 0.67	0.456	0.912	0.17		0.798476	1	0.21
510	102168533	LOC102168533	841.16 ± 76.47	678.36 ± 16.97	887.83 ± 21.09	0.114	0.228	-0.31		4.93918e-18	9.88e-18	0.39
511	102168534	LOC102168534	368.48 ± 18.35	148.58 ± 27.66	276.29 ± 33.26	0.00407	0.00814	-1.31	DN	2.98423e-20	5.96e-20	0.89
512	102168536	C7H5orf30	11.55 ± 0.41	19.02 ± 0.14	24.87 ± 0.39	0.00038	0.00076	0.72		0.328158	0.656316	0.39
513	102168539	ROR2	2.19 ± 0.15	1.43 ± 0.06	2.36 ± 0.04	0.0422	0.0844	-0.62		0.422997	0.845993	0.72
514	102168542	SFXN1	4.32 ± 0.24	1.76 ± 0.04	3.85 ± 0.1	0.00038	0.00076	-1.29	DN	1.12e-05	2.24e-05	1.13	UP
515	102168543	PARP16	4.44 ± 0.22	4.38 ± 0.09	3.67 ± 0.13	0.956	1	-0.02		1	1	-0.26
516	102168544	HAUS2	3.69 ± 0.19	4.38 ± 0.07	3.21 ± 0.1	0.383	0.766	0.25		0.498305	0.99661	-0.45
517	102168545	SPRED1	5.15 ± 0.45	5.79 ± 0.27	6.53 ± 0.11	0.482	0.964	0.17		0.851596	1	0.17
518	102168546	MPP5	9.09 ± 0.13	8.81 ± 0.02	9.53 ± 0.27	0.847	1	-0.05		0.942863	1	0.11
519	102168547	LOC102168547	676.25 ± 26.13	349.94 ± 23	402.14 ± 16.58	0.00038	0.00076	-0.95		0.0255512	0.0511024	0.2
520	102168548	SRBD1	5.94 ± 0.15	6.28 ± 0.09	6.06 ± 0.2	0.749	1	0.08		1	1	-0.05
521	102168549	YPEL5	32.56 ± 0.84	22.78 ± 0.8	32 ± 2.13	0.00407	0.00814	-0.51		0.346074	0.692147	0.49
522	102168552	LOC102168552	94.94 ± 6.25	36.21 ± 1.21	56.42 ± 2.64	0.00038	0.00076	-1.39	DN	0.00460418	0.00920836	0.64
523	102168557	RDX	3.28 ± 0.04	5.25 ± 0.14	5.36 ± 0.23	0.00667	0.01334	0.68		0.988496	1	0.03
524	102168558	ATP5L	337.95 ± 18.67	279.15 ± 5.9	356.67 ± 5.18	0.192	0.384	-0.28		5.36315e-06	1.072e-05	0.35
525	102168559	EIF4G2	158.65 ± 1.41	123.5 ± 0.47	149.92 ± 3.2	0.0965	0.193	-0.36		0.0275696	0.0551392	0.28
526	102168561	C16H1orf159	1.48 ± 0.01	1.08 ± 0.01	1.51 ± 0.04	0.24	0.48	-0.46		0.505043	1	0.49
527	102168562	VPS33A	3.68 ± 0.05	3.93 ± 0.02	3.87 ± 0.03	0.733	1	0.09		1	1	-0.02
528	102168564	NAA25	2.79 ± 0.05	3.56 ± 0.05	2.51 ± 0.13	0.0905	0.181	0.35		0.259112	0.518224	-0.51
529	102168567	SETD6	4.92 ± 0.2	6.59 ± 0.13	6.92 ± 0.07	0.18	0.36	0.42		1	1	0.07
530	102168568	SLC7A6	1.92 ± 0.11	2.79 ± 0.11	3.29 ± 0.05	0.027	0.054	0.54		1	1	0.24
531	102168569	LOC102168569	1.42 ± 0.04	1.18 ± 0.02	0.98 ± 0.03	0.482	0.964	-0.27		1	1	-0.26
532	102168574	PCYT2	34.6 ± 2.6	62.7 ± 2.08	75.75 ± 3.51	0.00038	0.00076	0.86		0.292959	0.585919	0.27
533	102168575	KDM6B	3.87 ± 0.06	4.38 ± 0.16	5.75 ± 0.16	0.494	0.988	0.18		0.557499	1	0.39
534	102168577	PLEKHM1	13 ± 0.76	8.69 ± 0.5	16.38 ± 0.91	0.00129	0.00258	-0.58		0.0306672	0.0613344	0.91
535	102168578	ERBB2IP	10.26 ± 0.27	6.86 ± 0.04	7.55 ± 0.2	0.00101	0.00202	-0.58		0.935904	1	0.14
536	102168579	LPP	2.93 ± 0.24	2.89 ± 0.14	2.86 ± 0.05	0.941	1	-0.02		1	1	-0.01
537	102168580	GABRA5	0.88 ± 0.13	1.23 ± 0.01	2.07 ± 0.09	0.267	0.534	0.48		0.298903	0.597805	0.75
538	102168583	SNX6	15.62 ± 0.4	15.45 ± 0.37	14.6 ± 0.62	0.949	1	-0.02		0.941225	1	-0.08
539	102168584	RRP1B	3.41 ± 0.13	5.47 ± 0.08	3.62 ± 0.19	0.00931	0.01862	0.68		0.716833	1	-0.6
540	102168587	SPOPL	2.29 ± 0.22	2.48 ± 0.21	1.73 ± 0.05	0.685	1	0.12		0.513173	1	-0.52
541	102168590	PBX2	23.48 ± 0.89	16.13 ± 0.24	20.19 ± 0.16	0.00277	0.00554	-0.54		0.532962	1	0.32
542	102168591	TMCO4	11.36 ± 0.21	9.94 ± 0.18	14.29 ± 0.2	0.366	0.732	-0.19		0.338242	0.676484	0.52
543	102168595	TXNDC11	14.69 ± 0.41	23.49 ± 0.62	22.45 ± 0.58	0.00038	0.00076	0.68		1	1	-0.07
544	102168596	PPL	61.62 ± 3.52	62.87 ± 4.08	80.24 ± 5.03	0.914	1	0.03		0.0326574	0.0653147	0.35
545	102168598	EIF3B	46.33 ± 2.22	57.85 ± 1.69	56.89 ± 2.51	0.101	0.202	0.32		0.97585	1	-0.02
546	102168601	ASNS	10.13 ± 0.3	7.5 ± 0.04	6.1 ± 0.05	0.0596	0.1192	-0.43		0.784206	1	-0.3
547	102168602	BAG3	24.18 ± 0.84	31.56 ± 1.35	34.94 ± 1.13	0.036	0.072	0.38		0.816131	1	0.15
548	102168603	CLN8	26.86 ± 1.72	29.59 ± 0.54	40.94 ± 0.14	0.55	1	0.14		0.0717198	0.14344	0.47
549	102168605	AIFM2	12.72 ± 0.8	17.62 ± 0.49	26.52 ± 1.12	0.0295	0.059	0.47		0.0998387	0.199677	0.59
550	102168606	ATP5G2	991.33 ± 30.23	1197.24 ± 32.58	1750.26 ± 44.39	0.238	0.476	0.27		1.41843e-59	2.84e-59	0.55
551	102168610	SCYL2	9.35 ± 0.21	9.12 ± 0.12	8.59 ± 0.23	0.889	1	-0.04		0.994658	1	-0.09
552	102168611	LOC102168611	150.26 ± 48.31	134.41 ± 9.41	36.83 ± 3.46	0.605	1	-0.16		8.46535e-39	1.694e-38	-1.87	DN
553	102168613	MTMR1	4.95 ± 0.15	4.38 ± 0.12	4.6 ± 0.09	0.467	0.934	-0.18		0.949553	1	0.07
554	102168614	FAM58A	15.7 ± 0.71	14.27 ± 0.79	14.31 ± 0.38	0.635	1	-0.14		0.986068	1	0
555	102168619	ZNF518B	1.18 ± 0.08	1.21 ± 0.02	0.81 ± 0.03	0.941	1	0.03		1	1	-0.57
556	102168620	UBA52	4533.15 ± 302.44	4654.68 ± 25.24	6900.7 ± 280.36	0.923	1	0.04		7.68632e-104	1.538e-103	0.57
557	102168627	SLC23A1	2.27 ± 0.14	1.52 ± 0.05	1.36 ± 0.09	0.53	1	-0.58		0.391128	0.782257	-0.17
558	102168628	ATOX1	188.63 ± 15.64	253.26 ± 5.79	273.2 ± 12.25	0.0318	0.0636	0.43		0.11489	0.229781	0.11
559	102168631	TDRD7	1.89 ± 0.07	1.27 ± 0.08	1.07 ± 0.03	0.0707	0.1414	-0.58		1	1	-0.25
560	102168632	XPO7	10.58 ± 0.2	10.65 ± 0.31	13 ± 0.48	0.969	1	0.01		0.680179	1	0.29
561	102168633	DCAF12	20.96 ± 0.16	16.49 ± 0.18	24.81 ± 0.27	0.0691	0.1382	-0.35		0.0978025	0.195605	0.59
562	102168635	DCAF11	23.41 ± 0.41	22.03 ± 0.78	29.28 ± 1.4	0.694	1	-0.09		0.290449	0.580899	0.41
563	102168640	PAPOLG	1.58 ± 0.07	2.12 ± 0.03	1.71 ± 0.05	0.0867	0.1734	0.43		1	1	-0.32
564	102168642	SH3GLB2	15.04 ± 0.16	16.07 ± 0.42	22.34 ± 0.73	0.73	1	0.1		0.286626	0.573253	0.48
565	102168645	MPP7	24.07 ± 0.51	27.46 ± 0.68	24.7 ± 0.89	0.346	0.692	0.19		0.681571	1	-0.15
566	102168647	VCPIP1	3.23 ± 0.09	3.05 ± 0.07	3.13 ± 0.08	0.727	1	-0.09		1	1	0.04
567	102168649	NBN	8.07 ± 0.14	6.06 ± 0.23	5.58 ± 0.25	0.0659	0.1318	-0.41		0.923143	1	-0.12
568	102168651	PDGFD	1.1 ± 0.17	1.23 ± 0.16	1.41 ± 0.15	0.71	1	0.15		0.808253	1	0.2
569	102168652	BTBD10	6.64 ± 0.05	9.07 ± 0.07	8.01 ± 0.2	0.0416	0.0832	0.45		0.876278	1	-0.18
570	102168654	CAPRIN1	50.85 ± 0.76	50.09 ± 0.91	55.75 ± 1.1	0.933	1	-0.02		0.64419	1	0.15
571	102168656	RGS2	5.3 ± 0.32	8.16 ± 0.6	3.52 ± 0.26	0.014	0.028	0.62		0.00101447	0.00202894	-1.21	DN
572	102168657	BLZF1	24 ± 1.88	35.64 ± 0.67	32.36 ± 0.42	0.00206	0.00412	0.57		0.803873	1	-0.14
573	102168658	KIAA2013	20.58 ± 0.44	23.41 ± 0.67	21.83 ± 0.01	0.372	0.744	0.19		0.940888	1	-0.1
574	102168662	ARL2BP	11.44 ± 0.23	16.06 ± 0.82	11.52 ± 0.21	0.0171	0.0342	0.49		0.291366	0.582733	-0.48
575	102168668	ZNF710	10.67 ± 0.41	8.12 ± 0.28	9.76 ± 0.06	0.0473	0.0946	-0.39		0.702745	1	0.26
576	102168669	UBE2D4	6.47 ± 0.16	4.46 ± 0.06	6.76 ± 0.24	0.0832	0.1664	-0.54		0.433503	0.867006	0.6
577	102168670	PLA2R1	21.57 ± 0.88	22.64 ± 0.58	34.5 ± 1.29	0.765	1	0.07		0.0233382	0.0466763	0.61
578	102168671	PDE12	2.38 ± 0.09	8.46 ± 0.15	4.06 ± 0.25	0.00038	0.00076	1.83	UP	1.61e-16	3.22e-16	-1.06	DN
579	102168675	MDC1	4.83 ± 0.14	4.95 ± 0.13	4.56 ± 0.09	0.894	1	0.03		1	1	-0.12
580	102168679	AP4B1	7.01 ± 0.07	4.87 ± 0.11	4.09 ± 0.28	0.0205	0.041	-0.53		0.905218	1	-0.25
581	102168682	POLR3E	6.15 ± 0.04	10.02 ± 0.19	7.3 ± 0.16	0.00038	0.00076	0.7		0.475334	0.950669	-0.46
582	102168683	EPS15	7.33 ± 0.22	7.99 ± 0.07	7.53 ± 0.24	0.569	1	0.12		0.937431	1	-0.09
583	102168686	NCDN	3.5 ± 0.06	4.14 ± 0.17	3.54 ± 0.17	0.433	0.866	0.24		0.941225	1	-0.23
584	102168687	LOC102168687	1.24 ± 0.19	1.04 ± 0.17	0.71 ± 0.13	0.652	1	-0.25		1	1	-0.55
585	102168690	LSM8	11.54 ± 0.46	14.85 ± 0.39	12.97 ± 0.65	0.137	0.274	0.36		0.816131	1	-0.19
586	102168693	ZNF746	2.99 ± 0.22	3.18 ± 0.24	2.64 ± 0.15	0.837	1	0.09		1	1	-0.27
587	102168694	DNAJB6	94.35 ± 2.83	132.93 ± 1.6	96.68 ± 2.38	0.00763	0.01526	0.49		0.000213985	0.00042797	-0.46
588	102168695	RASSF9	2.18 ± 0.09	1.99 ± 0.04	1.9 ± 0.08	0.729	1	-0.14		1	1	-0.07
589	102168698	KMT2D	3.33 ± 0.09	3.15 ± 0.07	2.85 ± 0.13	0.712	1	-0.08		1	1	-0.14
590	102168701	LOC102168701	7495.57 ± 845.53	5598.69 ± 169.86	9536.16 ± 345.85	0.179	0.358	-0.42		3.17567e-72	6.36e-72	0.77
591	102168702	LOC102168702	2.38 ± 1.17	2.52 ± 1.13	2.61 ± 1.17	1	1	0.08		0.866189	1	0.05
592	102168705	SPSB2	8.11 ± 0.62	11.57 ± 0.18	12.5 ± 0.31	0.0582	0.1164	0.51		0.846771	1	0.11
593	102168709	CWH43	82.11 ± 3.83	50.93 ± 0.82	61.7 ± 2.05	0.00038	0.00076	-0.69		0.175136	0.350272	0.28
594	102168710	PDHA1	73.62 ± 3.53	62.26 ± 2.86	78.25 ± 2.51	0.222	0.444	-0.24		0.0150898	0.0301796	0.33
595	102168711	OFD1	3.87 ± 0.15	1.99 ± 0.08	1.93 ± 0.03	0.00038	0.00076	-0.96		1	1	-0.04
596	102168714	NACC1	12.93 ± 0.65	19.18 ± 1.28	19.92 ± 0.85	0.00299	0.00598	0.57		0.850654	1	0.05
597	102168717	PRKCSH	60.97 ± 3.75	51.8 ± 2.32	79.12 ± 4.55	0.239	0.478	-0.24		0.00718541	0.0143708	0.61
598	102168719	HNRNPAB	93.71 ± 2.63	171.84 ± 3.79	133.25 ± 4.36	0.00038	0.00076	0.87		0.00987298	0.019746	-0.37
599	102168723	LOC102168723	5.7 ± 0.32	7.84 ± 0.39	7.11 ± 0.18	0.189	0.378	0.46		0.89852	1	-0.14
600	102168724	CBR4	31.13 ± 0.34	21.28 ± 0.38	29.55 ± 0.35	0.0023	0.0046	-0.55		0.139233	0.278465	0.47
601	102168725	RFK	8.2 ± 0.12	11.39 ± 0.22	11.78 ± 0.21	0.0224	0.0448	0.47		0.981183	1	0.05
602	102168726	ASPN	3.78 ± 0.61	2.27 ± 0.18	3.33 ± 0.64	0.292	0.584	-0.73		0.368971	0.737942	0.55
603	102168727	INIP	6.7 ± 0.11	6.4 ± 0.2	6.7 ± 0.22	0.8	1	-0.07		1	1	0.07
604	102168730	GINM1	17.26 ± 0.52	11.21 ± 0.15	12.27 ± 0.06	0.00299	0.00598	-0.62		0.89852	1	0.13
605	102168732	CSNK1G1	2.15 ± 0.18	1.98 ± 0.14	3.14 ± 0.17	0.771	1	-0.12		0.422171	0.844342	0.67
606	102168733	RBPMS2	19.28 ± 5.91	24.62 ± 3.23	2.26 ± 0.07	0.137	0.274	0.35		2.5563e-11	5.12e-11	-3.45	DN
607	102168734	DLST	66.05 ± 3.4	61.66 ± 2.61	74.69 ± 2.36	0.646	1	-0.1		0.201253	0.402507	0.28
608	102168736	NDUFA8	171.59 ± 15.34	192.35 ± 4.47	235.38 ± 10.09	0.427	0.854	0.16		0.00307634	0.00615268	0.29
609	102168737	LOC102168737	4.84 ± 0.2	4.65 ± 0.07	7.21 ± 0.56	0.908	1	-0.06		0.610401	1	0.63
610	102168739	SPATA13	4.72 ± 0.14	5.68 ± 0.17	5.77 ± 0.18	0.191	0.382	0.27		1	1	0.02
611	102168741	LARP4B	13.66 ± 0.18	14.82 ± 0.67	19.7 ± 0.68	0.598	1	0.12		0.373535	0.74707	0.41
612	102168744	OSER1	48.57 ± 2.04	60.98 ± 1	71.03 ± 2.46	0.0848	0.1696	0.33		0.280748	0.561496	0.22
613	102168746	SLC52A2	21.18 ± 0.48	18.6 ± 0.23	21.3 ± 0.49	0.386	0.772	-0.19		0.758842	1	0.2
614	102168749	ARMC1	9.97 ± 0.31	11.08 ± 0.17	11.17 ± 0.75	0.492	0.984	0.15		0.980662	1	0.01
615	102168751	PAAF1	6.71 ± 0.07	6.78 ± 0.09	5.52 ± 0.11	0.966	1	0.01		0.6635	1	-0.3
616	102168752	HARBI1	5.65 ± 0.17	7.39 ± 0.1	6.54 ± 0.08	0.132	0.264	0.39		0.93228	1	-0.18
617	102168755	LOC102168755	10.3 ± 0.44	10.33 ± 0.57	11.75 ± 0.16	0.995	1	0		0.844203	1	0.19
618	102168760	TLCD1	3.88 ± 0.19	4.53 ± 0.23	4.62 ± 0.05	0.61	1	0.22		0.949553	1	0.03
619	102168764	HOXB7	1.71 ± 0.28	2.19 ± 0.26	1.24 ± 0.04	0.478	0.956	0.36		0.229604	0.459207	-0.82
620	102168774	FAM219B	10.77 ± 0.37	9.2 ± 0.06	7.54 ± 0.23	0.305	0.61	-0.23		0.844218	1	-0.29
621	102168775	MCM3AP	8.82 ± 0.11	8.38 ± 0.3	8.61 ± 0.22	0.749	1	-0.07		0.994658	1	0.04
622	102168777	SSB	40.21 ± 3.22	62 ± 0.72	31.61 ± 1.76	0.00101	0.00202	0.62		1.21718e-07	2.44e-07	-0.97
623	102168779	USP37	1.3 ± 0.11	1.59 ± 0.05	1.05 ± 0.04	0.219	0.438	0.29		0.298903	0.597806	-0.59
624	102168780	AGFG1	14.04 ± 0.28	19.23 ± 0.51	16.36 ± 0.67	0.0169	0.0338	0.45		0.704307	1	-0.23
625	102168781	KIFC1	1.26 ± 0.08	4.71 ± 0.1	2.94 ± 0.06	0.00038	0.00076	1.91	UP	0.487687	0.975374	-0.68
626	102168782	LOC102168782	1.21 ± 0.09	1.67 ± 0.03	1 ± 0.03	0.236	0.472	0.47		0.298903	0.597806	-0.74
627	102168785	TUFT1	24.85 ± 1.01	25.62 ± 0.72	37.57 ± 0.61	0.856	1	0.04		0.0429231	0.0858462	0.55
628	102168786	RBBP8	11.68 ± 0.61	17.94 ± 0.25	18.99 ± 0.5	0.00101	0.00202	0.62		0.970483	1	0.08
629	102168787	SMCHD1	5.72 ± 0.2	6.58 ± 0.19	5.78 ± 0.06	0.323	0.646	0.2		0.890824	1	-0.19
630	102168788	RNF115	5.42 ± 0.04	6.75 ± 0.21	4.88 ± 0.13	0.23	0.46	0.32		0.657914	1	-0.47
631	102168790	PRKACB	1.35 ± 0.26	1.12 ± 0.16	0.73 ± 0.03	0.458	0.916	-0.27		1	1	-0.61
632	102168794	ST3GAL3	1.71 ± 0.16	1.38 ± 0.04	1.3 ± 0.07	0.475	0.95	-0.31		1	1	-0.08
633	102168797	CDCA7L	5.28 ± 0.36	5.12 ± 0.13	6.01 ± 0.21	0.896	1	-0.04		0.838359	1	0.23
634	102168802	RBM34	3.73 ± 0.25	3.78 ± 0.18	1.99 ± 0.13	0.956	1	0.02		0.181602	0.363205	-0.92
635	102168803	CS	28.82 ± 0.26	31.8 ± 0.8	38.44 ± 1.7	0.584	1	0.14		0.590641	1	0.27
636	102168804	SF1	37.4 ± 1.45	40.31 ± 0.78	44.39 ± 2.11	0.618	1	0.11		0.682966	1	0.14
637	102168808	LOC102168808	297.89 ± 5.96	187.61 ± 1.88	266.24 ± 10.73	0.00038	0.00076	-0.67		8.49314e-08	1.698e-07	0.51
638	102168811	LOC102168811	2.5 ± 0.3	4.01 ± 0.22	3.74 ± 0.47	0.057	0.114	0.68		0.942863	1	-0.1
639	102168818	CDC42SE2	9.23 ± 0.34	12.22 ± 0.48	13.76 ± 0.15	0.0415	0.083	0.41		0.838359	1	0.17
640	102168820	TCF3	4.21 ± 0.17	4.78 ± 0.14	3.62 ± 0.13	0.438	0.876	0.18		0.761932	1	-0.4
641	102168824	NUDT12	19.22 ± 0.48	11.9 ± 0.19	17.74 ± 0.77	0.00038	0.00076	-0.69		0.213559	0.427117	0.58
642	102168827	AUH	22.05 ± 0.2	16.69 ± 0.18	22.46 ± 0.34	0.049	0.098	-0.4		0.316831	0.633662	0.43
643	102168832	FAM98B	10.75 ± 0.24	14.52 ± 0.11	13.67 ± 0.46	0.041	0.082	0.43		0.913176	1	-0.09
644	102168833	LOC102168833	3.28 ± 0.52	1.91 ± 0.14	1.12 ± 0.13	0.00254	0.00508	-0.78		0.298903	0.597806	-0.78
645	102168839	SNRPB2	28.59 ± 0.99	36.05 ± 1.43	26.55 ± 1.8	0.0979	0.1958	0.33		0.114107	0.228213	-0.44
646	102168844	RNF223	17.88 ± 0.55	19.92 ± 1.09	32.23 ± 2.46	0.614	1	0.16		0.0135721	0.0271441	0.69
647	102168845	LOC102168845	1.45 ± 0.16	1.49 ± 0.09	1.19 ± 0.23	0.942	1	0.04		0.505043	1	-0.32
648	102168848	ERP29	106.75 ± 6.84	108.03 ± 0.51	133.25 ± 1.47	0.947	1	0.02		0.0278009	0.0556019	0.3
649	102168849	LOC102168849	10.61 ± 0.27	6.22 ± 0.2	8.96 ± 0.17	0.00552	0.01104	-0.77		0.432227	0.864455	0.53
650	102168850	GOT2	44.63 ± 0.84	67.48 ± 1.88	65.59 ± 2.33	0.00101	0.00202	0.6		0.770893	1	-0.04
651	102168851	SLC7A6OS	15.5 ± 0.49	14.97 ± 0.37	19.45 ± 0.89	0.862	1	-0.05		0.487568	0.975136	0.38
652	102168855	AATF	7.35 ± 0.21	11.87 ± 0.35	9.43 ± 0.24	0.00156	0.00312	0.69		0.737207	1	-0.33
653	102168856	PHF12	4.27 ± 0.36	4.83 ± 0.06	6.33 ± 0.29	0.468	0.936	0.18		0.702745	1	0.39
654	102168857	MIEF2	4.55 ± 0.12	6.57 ± 0.1	5.07 ± 0.19	0.0306	0.0612	0.53		0.609886	1	-0.37
655	102168859	SMIM5	116.53 ± 11.97	47.43 ± 1.6	89.29 ± 3.49	0.00038	0.00076	-1.3	DN	9.47312e-08	1.894e-07	0.91
656	102168860	TMEM88	1.48 ± 0.38	2.59 ± 0.39	1.1 ± 0.09	0.148	0.296	0.8		0.004677	0.00935399	-1.23	DN
657	102168864	BAZ1A	1.95 ± 0.11	5.44 ± 0.12	2.89 ± 0.12	0.00038	0.00076	1.48	UP	0.386101	0.772203	-0.91
658	102168865	PDXK	6.59 ± 0.1	6.97 ± 0.34	5.78 ± 0.09	0.758	1	0.08		0.890824	1	-0.27
659	102168867	MANF	44.96 ± 1.99	166.11 ± 2.81	72.23 ± 4.06	0.00038	0.00076	1.89	UP	1.05931e-26	2.12e-26	-1.2	DN
660	102168869	RAB7A	89.02 ± 0.97	106.47 ± 1.9	115.03 ± 2.14	0.198	0.396	0.26		0.592115	1	0.11
661	102168870	PEF1	22.81 ± 0.53	15.29 ± 0.19	16.5 ± 0.14	0.00387	0.00774	-0.58		0.833875	1	0.11
662	102168874	LOC102168874	35.25 ± 1.96	15.57 ± 0.46	62.39 ± 2.29	0.00038	0.00076	-1.18	DN	2.31227e-18	4.62e-18	2	UP
663	102168876	S100A8	2992.21 ± 281.15	27.81 ± 3.17	33.29 ± 3.31	0.00038	0.00076	-6.75	DN	0.725324	1	0.26
664	102168877	WDR7	4.94 ± 0.2	3.7 ± 0.14	4.86 ± 0.07	0.0303	0.0606	-0.42		0.816131	1	0.39
665	102168882	INPP5F	3.71 ± 0.02	5.6 ± 0.15	3.07 ± 0.14	0.00277	0.00554	0.6		0.29699	0.593981	-0.87
666	102168883	MCMBP	6.8 ± 0.25	13.18 ± 0.41	7.36 ± 0.14	0.00038	0.00076	0.96		0.0885463	0.177093	-0.84
667	102168885	MTUS1	9.51 ± 0.13	6.31 ± 0.07	11.78 ± 0.48	0.00181	0.00362	-0.59		0.0732815	0.146563	0.9
668	102168887	C28H10orf107	1.73 ± 0.06	1.28 ± 0.14	1.18 ± 0.05	0.388	0.776	-0.43		1	1	-0.11
669	102168888	SAMD8	27.52 ± 0.68	19.19 ± 1.57	32.69 ± 2.98	0.00552	0.01104	-0.52		0.0178994	0.0357988	0.77
670	102168890	ARID2	2.62 ± 0.09	2.56 ± 0.1	2.21 ± 0.02	0.909	1	-0.03		0.732925	1	-0.21
671	102168891	CTDSP2	74.68 ± 1.14	50.84 ± 0.52	63.32 ± 0.59	0.00343	0.00686	-0.55		0.126281	0.252563	0.32
672	102168893	TOM1	12.17 ± 0.09	17.61 ± 0.57	15.21 ± 0.49	0.00365	0.0073	0.53		0.75265	1	-0.21
673	102168894	STK38L	25.01 ± 0.77	29.11 ± 0.68	41.51 ± 1.67	0.273	0.546	0.22		0.0223403	0.0446806	0.51
674	102168897	SNU13	47.97 ± 1.24	71.71 ± 2.12	60.6 ± 0.42	0.00101	0.00202	0.58		0.24744	0.494879	-0.24
675	102168900	DHX15	21.92 ± 0.59	36.69 ± 0.87	26.9 ± 1.05	0.00038	0.00076	0.74		0.155848	0.311695	-0.45
676	102168908	TMEM2	3.23 ± 0.08	1.96 ± 0.06	3.52 ± 0.11	0.00038	0.00076	-0.72		0.346223	0.692447	0.84
677	102168910	SNX9	18.17 ± 0.02	16.66 ± 0.39	15.41 ± 0.22	0.547	1	-0.13		0.986068	1	-0.11
678	102168913	FEZ2	3.08 ± 0.21	3.79 ± 0.19	2.49 ± 0.07	0.58	1	0.3		0.259112	0.518224	-0.6
679	102168914	TMEM150A	3.84 ± 0.14	6.47 ± 0.05	2.95 ± 0.11	0.00206	0.00412	0.75		1.75e-11	3.5e-11	-1.13	DN
680	102168915	FAM73B	7.09 ± 0.21	9.39 ± 0.35	5.55 ± 0.07	0.0861	0.1722	0.4		0.243635	0.487271	-0.76
681	102168916	ABO	20.93 ± 0.55	9.97 ± 0.25	5.96 ± 0.15	0.00038	0.00076	-1.07	DN	0.258014	0.516028	-0.74
682	102168917	DIAPH3	3.16 ± 0.23	2.4 ± 0.16	1.9 ± 0.08	0.149	0.298	-0.39		0.861115	1	-0.34
683	102168918	SLC25A15	3.59 ± 0.18	3.9 ± 0.24	4.1 ± 0.29	0.766	1	0.12		1	1	0.07
684	102168921	FERMT1	6.86 ± 0.05	5.87 ± 0.17	9.49 ± 0.34	0.297	0.594	-0.23		0.322952	0.645904	0.69
685	102168922	NCOA6	5.4 ± 0.1	3.74 ± 0.21	5.19 ± 0.28	0.00572	0.01144	-0.53		0.816131	1	0.47
686	102168926	NAT10	7 ± 0.21	8.01 ± 0.12	6.07 ± 0.26	0.369	0.738	0.19		0.648463	1	-0.4
687	102168930	AGTRAP	10 ± 0.48	9.19 ± 0.25	12.32 ± 0.3	0.614	1	-0.12		0.552858	1	0.42
688	102168931	UBE2J2	19.49 ± 0.49	28.04 ± 0.66	26 ± 0.39	0.00647	0.01294	0.52		0.910969	1	-0.11
689	102168932	PLXNA2	3.58 ± 0.03	4.98 ± 0.23	3.84 ± 0.15	0.0105	0.021	0.48		0.816131	1	-0.37
690	102168934	PDGFC	7.19 ± 0.22	1.85 ± 0.11	2.36 ± 0.12	0.00038	0.00076	-1.96	DN	1	1	0.35
691	102168935	SPG7	35.31 ± 1.53	31.95 ± 1.43	42.18 ± 1.09	0.495	0.99	-0.14		0.16009	0.32018	0.4
692	102168939	CALCOCO2	149.47 ± 7.26	120.74 ± 1.37	109.54 ± 1.77	0.148	0.296	-0.31		0.491908	0.983815	-0.14
693	102168942	ZMAT3	1.31 ± 0.12	1.96 ± 0.07	1.35 ± 0.12	0.0174	0.0348	0.57		0.298903	0.597806	-0.53
694	102168943	IDH2	53.01 ± 0.89	58.62 ± 1.39	54.82 ± 1.55	0.483	0.966	0.15		0.839503	1	-0.1
695	102168944	BNC1	2.82 ± 0.07	1.93 ± 0	1.71 ± 0.02	0.0284	0.0568	-0.55		1	1	-0.17
696	102168945	TMEM251	7.5 ± 0.25	7.33 ± 0.14	6.88 ± 0.16	0.914	1	-0.03		1	1	-0.09
697	102168948	LOC102168948	2.38 ± 0.18	1.68 ± 0.11	1.31 ± 0.08	0.0273	0.0546	-0.5		0.298903	0.597806	-0.36
698	102168953	TUBB	95.87 ± 0.83	174.22 ± 3.54	168.38 ± 3.21	0.00038	0.00076	0.86		0.763649	1	-0.05
699	102168955	USP21	3.88 ± 0.12	3.77 ± 0.09	3.02 ± 0.06	0.901	1	-0.04		0.498305	0.99661	-0.32
700	102168960	TBL3	10.74 ± 0.59	18.52 ± 0.61	14.66 ± 0.25	0.00038	0.00076	0.79		0.600027	1	-0.34
701	102168963	MYSM1	2.37 ± 0.11	1.57 ± 0.04	1.51 ± 0.07	0.0492	0.0984	-0.59		0.854129	1	-0.06
702	102168967	LOC102168967	149.05 ± 11.77	281.33 ± 17.32	177.25 ± 2.36	0.00038	0.00076	0.92		6.37799e-12	1.276e-11	-0.67
703	102168968	IFIT3	2.02 ± 0.4	1.23 ± 0.2	0.87 ± 0.15	0.0649	0.1298	-0.72		0.6434	1	-0.5
704	102168970	LOC102168970	15.31 ± 2.05	20.75 ± 1.48	26.13 ± 3.81	0.179	0.358	0.44		0.610601	1	0.33
705	102168976	ATF1	14.46 ± 0.13	13.46 ± 0.22	16.3 ± 0.28	0.703	1	-0.1		0.604801	1	0.28
706	102168983	SCYL1	23.04 ± 0.83	19.3 ± 0.48	24.13 ± 0.6	0.197	0.394	-0.26		0.475334	0.950669	0.32
707	102168985	AEBP2	10.35 ± 0.64	6.99 ± 0.24	9.6 ± 0.42	0.00206	0.00412	-0.57		0.557499	1	0.46
708	102168991	RAB28	22.57 ± 0.97	18.63 ± 0.17	24.04 ± 0.82	0.195	0.39	-0.28		0.392197	0.784393	0.37
709	102168993	LOC102168993	2.29 ± 1.15	1.02 ± 0.01	1.26 ± 0.16	0.22	0.44	-1.16		1	1	0.3
710	102168994	LYL1	5.25 ± 0.41	1.89 ± 0.05	4.09 ± 0.13	0.00038	0.00076	-1.47	DN	0.00211831	0.00423663	1.11	UP
711	102168996	INSR	8.27 ± 0.28	6.16 ± 0.18	6.43 ± 0.13	0.0293	0.0586	-0.42		0.928875	1	0.06
712	102168997	ZNF653	3.06 ± 0.26	1.81 ± 0.16	2.38 ± 0.05	0.0323	0.0646	-0.76		1	1	0.4
713	102168999	CLK4	8.77 ± 0.73	7.64 ± 0.53	17.62 ± 1.29	0.463	0.926	-0.2		0.00990036	0.0198007	1.2	UP
714	102169000	LOC102169000	3.17 ± 0.41	7.4 ± 0.3	3.45 ± 0.35	0.00038	0.00076	1.22	UP	0.0165387	0.0330775	-1.1	DN
715	102169002	LOC102169002	68.22 ± 2.94	52.16 ± 0.62	76.53 ± 2.91	0.0421	0.0842	-0.39		0.00122379	0.00244759	0.55
716	102169005	SH3RF1	4.11 ± 0.06	5.68 ± 0.27	6.61 ± 0.27	0.0343	0.0686	0.47		0.923143	1	0.22
717	102169008	PHIP	2.91 ± 0.16	2.18 ± 0.05	2.42 ± 0.06	0.0526	0.1052	-0.42		0.861114	1	0.15
718	102169010	QRSL1	4.33 ± 0.23	3.37 ± 0.03	4.46 ± 0.02	0.254	0.508	-0.36		0.722977	1	0.4
719	102169011	PCMT1	19.1 ± 0.06	26.74 ± 0.74	23.6 ± 0.59	0.0102	0.0204	0.49		0.652935	1	-0.18
720	102169013	OAZ2	59.72 ± 1.15	64.61 ± 1.93	69.16 ± 1.75	0.597	1	0.11		0.694277	1	0.1
721	102169016	PRKCE	1.4 ± 0.02	2.82 ± 0.07	5.44 ± 0.17	0.00038	0.00076	1.01	UP	0.487687	0.975374	0.95
722	102169018	CLIP4	18.79 ± 0.6	7.47 ± 0.17	7.52 ± 0.27	0.00038	0.00076	-1.33	DN	1	1	0.01
723	102169021	FPGS	63.09 ± 3.67	54.23 ± 1.56	152.75 ± 7.33	0.28	0.56	-0.22		5.4145e-31	1.082e-30	1.49	UP
724	102169022	TNFRSF19	1.81 ± 0.35	0.96 ± 0.06	1.68 ± 0.06	0.00038	0.00076	-0.91		0.298903	0.597805	0.8
725	102169023	MIPEP	21.28 ± 0.97	17.08 ± 0.46	19.66 ± 0.61	0.104	0.208	-0.32		0.710353	1	0.2
726	102169026	RAE1	11.51 ± 0.14	11.02 ± 0.2	10.7 ± 0.23	0.822	1	-0.06		0.996818	1	-0.04
727	102169029	TBC1D31	2.18 ± 0.05	2.92 ± 0.06	2.8 ± 0.09	0.131	0.262	0.42		1	1	-0.06
728	102169031	MTFR1	20.26 ± 0.11	29.33 ± 0.27	28.81 ± 0.85	0.00343	0.00686	0.53		1	1	-0.03
729	102169037	RBBP5	13.02 ± 0.1	15.53 ± 0.35	15.81 ± 0.07	0.219	0.438	0.25		0.942863	1	0.03
730	102169038	LOC102169038	10.32 ± 0.95	7.34 ± 0.19	14.53 ± 0.4	0.299	0.598	-0.49		0.0299398	0.0598797	0.99
731	102169040	MVD	20.34 ± 1.63	30.7 ± 0.91	27.52 ± 0.69	0.00038	0.00076	0.59		0.727472	1	-0.16
732	102169043	KLK14	4.86 ± 0.29	1.2 ± 0.17	14.84 ± 1.12	0.00038	0.00076	-2.02	DN	9.3322e-07	1.866e-06	3.63	UP
733	102169045	LOC102169045	2.27 ± 0.25	2.56 ± 0.06	1.91 ± 0.1	0.703	1	0.17		0.513173	1	-0.43
734	102169046	PTRH2	17.52 ± 1.36	34.06 ± 0.91	19.95 ± 0.4	0.0102	0.0204	0.96		0.00784163	0.0156833	-0.77
735	102169047	NEK8	1.68 ± 0.15	1.22 ± 0.07	0.65 ± 0.03	0.257	0.514	-0.46		1	1	-0.91
736	102169049	ANAPC11	155.46 ± 9.01	155.48 ± 3.31	194.18 ± 9.97	0.999	1	0		0.00543068	0.0108614	0.32
737	102169051	URB1	3.91 ± 0.06	3.19 ± 0.11	2.87 ± 0.18	0.167	0.334	-0.29		1	1	-0.15
738	102169052	UBALD2	72.65 ± 2.61	59.61 ± 0.97	96.14 ± 0.55	0.143	0.286	-0.29		9.1261e-06	1.826e-05	0.69
739	102169053	NSUN3	3.27 ± 0.02	3.49 ± 0.13	3.82 ± 0.17	0.792	1	0.09		0.986068	1	0.13
740	102169054	DCBLD2	1.24 ± 0.11	2.14 ± 0.04	1.64 ± 0.07	0.018	0.036	0.79		1	1	-0.39
741	102169055	ZNF148	3.73 ± 0.19	3.04 ± 0.13	2.97 ± 0.15	0.155	0.31	-0.3		1	1	-0.03
742	102169057	SCAMP2	44.7 ± 0.14	39.41 ± 1.02	53.63 ± 0.61	0.365	0.73	-0.18		0.0514631	0.102926	0.44
743	102169059	HNMT	2.77 ± 0.17	1.32 ± 0.06	1.74 ± 0.11	0.00451	0.00902	-1.07	DN	0.391128	0.782256	0.4
744	102169061	CUTA	182.03 ± 9.93	170.49 ± 1.74	219.3 ± 4.95	0.673	1	-0.09		6.47683e-05	0.0001296	0.36
745	102169067	KDM4A	11.98 ± 0.24	7.05 ± 0.2	10.34 ± 0.47	0.00038	0.00076	-0.76		0.397758	0.795515	0.55
746	102169068	FBRS	9.12 ± 0.19	9.15 ± 0.22	8.86 ± 0.35	0.991	1	0		1	1	-0.05
747	102169070	ACKR3	10.58 ± 0.65	5.13 ± 0.14	4.14 ± 0.09	0.00038	0.00076	-1.04	DN	0.816131	1	-0.31
748	102169071	TM9SF3	53.21 ± 1.07	51.47 ± 1.66	50.05 ± 1.1	0.84	1	-0.05		0.882135	1	-0.04
749	102169072	PSD3	1.88 ± 0.13	1.9 ± 0.07	2.56 ± 0.09	0.966	1	0.02		0.513173	1	0.43
750	102169074	SAR1A	31.31 ± 0.68	46 ± 0.57	39.34 ± 1.64	0.0061	0.0122	0.55		0.573713	1	-0.23
751	102169076	RAB3IP	5.16 ± 0.07	6.87 ± 0.1	6.46 ± 0.17	0.131	0.262	0.41		0.992082	1	-0.09
752	102169077	COQ10A	14.12 ± 0.66	16.81 ± 0.27	17.47 ± 0.68	0.558	1	0.25		0.96903	1	0.06
753	102169079	CDC42BPG	25.18 ± 1.02	22.51 ± 1.04	27.52 ± 1.37	0.433	0.866	-0.16		0.341676	0.683353	0.29
754	102169080	MCM5	4.72 ± 0.21	13.98 ± 0.29	13.19 ± 0.19	0.00038	0.00076	1.57	UP	0.986068	1	-0.08
755	102169082	LOC102169082	3.99 ± 0.25	4.13 ± 0.04	4.47 ± 0.18	0.896	1	0.05		0.942863	1	0.11
756	102169083	LOC102169083	2.65 ± 0.87	1.16 ± 0.15	1.79 ± 0.4	0.269	0.538	-1.19		0.303474	0.606949	0.62
757	102169086	PRAF2	2.67 ± 0.12	2.99 ± 0.04	2.46 ± 0.15	0.676	1	0.16		0.6445	1	-0.28
758	102169094	RPL36	10325.24 ± 437.16	6753.17 ± 146.79	11771.3 ± 819.26	0.00407	0.00814	-0.61		6.36324e-231	1.272e-230	0.8
759	102169096	YTHDF1	8.69 ± 0.28	15.97 ± 0.46	20.48 ± 0.55	0.00038	0.00076	0.88		0.386101	0.772203	0.36
760	102169097	G3BP1	14.53 ± 0.33	27.43 ± 0.39	17.66 ± 0.24	0.00038	0.00076	0.92		0.0598886	0.119777	-0.64
761	102169098	LOC102169098	2.1 ± 0.37	1.43 ± 0.13	1.33 ± 0.05	0.116	0.232	-0.55		0.808253	1	-0.11
762	102169100	TEK	1.24 ± 0.25	1.58 ± 0.2	1.24 ± 0.27	0.27	0.54	0.36		0.690566	1	-0.35
763	102169108	ARID4A	6.88 ± 0.03	5.61 ± 0.07	6.76 ± 0.34	0.141	0.282	-0.29		0.890824	1	0.27
764	102169112	TPP2	6.86 ± 0.1	10.08 ± 0.33	8 ± 0.2	0.00321	0.00642	0.56		0.702745	1	-0.33
765	102169113	DPM1	74.46 ± 6.38	84.04 ± 1.69	74.6 ± 2.68	0.399	0.798	0.17		0.47816	0.956319	-0.17
766	102169114	OSGIN2	3.58 ± 0.12	5.06 ± 0.13	5.52 ± 0.16	0.107	0.214	0.5		0.952407	1	0.13
767	102169122	MTFP1	5.99 ± 0.63	5.6 ± 0.25	5.56 ± 0.07	0.803	1	-0.1		0.990335	1	-0.01
768	102169128	SYNRG	5.64 ± 0.07	3.43 ± 0.06	4.75 ± 0.09	0.00038	0.00076	-0.72		0.559604	1	0.47
769	102169129	SAT2	4.79 ± 0.2	2.55 ± 0.13	3.02 ± 0.07	0.0474	0.0948	-0.91		0.644499	1	0.25
770	102169130	FLII	49.85 ± 2.51	41.29 ± 1.62	56.07 ± 3.31	0.231	0.462	-0.27		0.0315083	0.0630165	0.44
771	102169132	CHD3	12.44 ± 0.32	6.5 ± 0.25	7.34 ± 0.41	0.00038	0.00076	-0.94		1	1	0.18
772	102169135	ASB7	3.2 ± 0.13	3.11 ± 0.14	3.76 ± 0.08	0.928	1	-0.04		0.498305	0.996609	0.27
773	102169137	NFKBIA	35.08 ± 0.47	27.26 ± 0.68	20.26 ± 0.52	0.0619	0.1238	-0.36		0.27285	0.545699	-0.43
774	102169138	RRP1	16.1 ± 0.32	24.78 ± 0.5	17.51 ± 0.93	0.00552	0.01104	0.62		0.147335	0.29467	-0.5
775	102169142	CISH	1.72 ± 0.06	1.69 ± 0.02	2.5 ± 0.07	0.957	1	-0.03		0.616758	1	0.56
776	102169144	DHDDS	7.39 ± 0.03	8.06 ± 0.27	7.57 ± 0.05	0.591	1	0.13		0.994112	1	-0.09
777	102169146	MINOS1	468.89 ± 21.46	547.09 ± 9.45	634.01 ± 20.74	0.267	0.534	0.22		0.000172785	0.00034557	0.21
778	102169149	S100A12	2044.27 ± 170.7	28.23 ± 2.9	31.13 ± 3.44	0.00038	0.00076	-6.18	DN	0.925524	1	0.14
779	102169152	NAGPA	5.69 ± 0.19	3.13 ± 0.08	2.94 ± 0.03	0.00277	0.00554	-0.86		1	1	-0.09
780	102169153	TTYH3	9.39 ± 0.54	10.88 ± 0.94	15.57 ± 0.35	0.68	1	0.21		0.311093	0.622187	0.52
781	102169158	MTPN	22.19 ± 0.67	22.01 ± 1.15	26.57 ± 1.58	0.968	1	-0.01		0.638922	1	0.27
782	102169162	LOC102169162	6.07 ± 0.3	8.68 ± 0.02	6.16 ± 0.47	0.0104	0.0208	0.52		0.536741	1	-0.5
783	102169165	MED21	63.66 ± 3.39	57.74 ± 0.97	77.58 ± 0.62	0.519	1	-0.14		0.0177809	0.0355618	0.43
784	102169167	TIGAR	3.14 ± 0.11	14.54 ± 0.47	5.89 ± 0.24	0.00038	0.00076	2.21	UP	0.00519954	0.0103991	-1.3	DN
785	102169171	SULT1B1	23.74 ± 2.75	68.31 ± 0.84	59.4 ± 2.03	0.00038	0.00076	1.52	UP	0.553605	1	-0.2
786	102169173	TRAPPC2	15.16 ± 1.04	18.19 ± 0.17	11.48 ± 0.7	0.234	0.468	0.26		0.117922	0.235843	-0.66
787	102169176	LOC102169176	13.34 ± 0.44	15.22 ± 0.22	1.72 ± 0.15	0.519	1	0.19		9.04668e-07	1.81e-06	-3.14	DN
788	102169180	NAV1	2.33 ± 0.04	2.88 ± 0.06	1.49 ± 0.1	0.296	0.592	0.31		0.244488	0.488977	-0.95
789	102169182	LOC102169182	843.79 ± 87.02	921.76 ± 27.08	1135.17 ± 17.29	0.641	1	0.13		1.28525e-15	2.58e-15	0.3
790	102169184	LOC102169184	1.04 ± 0.05	1.07 ± 0.06	0.94 ± 0.05	0.928	1	0.04		1	1	-0.19
791	102169187	MAPK6	11.5 ± 0.42	29.58 ± 0.45	24.72 ± 0.7	0.00038	0.00076	1.36	UP	0.546304	1	-0.26
792	102169189	RNF181	94.22 ± 5.12	98.68 ± 1.43	118.26 ± 2.06	0.78	1	0.07		0.10491	0.209821	0.26
793	102169190	LOC102169190	7.81 ± 0.06	8.19 ± 0.27	6.73 ± 0.06	0.825	1	0.07		0.838359	1	-0.28
794	102169192	MRPS31	9.59 ± 0.48	14.69 ± 0.16	9.87 ± 0.17	0.00277	0.00554	0.62		0.284915	0.56983	-0.57
795	102169193	PIP4K2A	4.14 ± 0.38	2.6 ± 0.15	3.02 ± 0.05	0.00552	0.01104	-0.67		0.881875	1	0.21
796	102169195	DIP2C	3.69 ± 0.28	2.18 ± 0.08	3.09 ± 0.07	0.00101	0.00202	-0.76		0.422171	0.844342	0.5
797	102169203	ATG13	12.96 ± 0.25	8.94 ± 0.18	16.31 ± 0.5	0.0043	0.0086	-0.54		0.0505774	0.101155	0.87
798	102169205	RGS1	3.1 ± 0.08	4.17 ± 0.64	3.89 ± 0.5	0.24	0.48	0.43		0.942863	1	-0.1
799	102169206	FBXO2	2.46 ± 0.14	2.12 ± 0.1	6.17 ± 3.13	0.618	1	-0.22		0.0115468	0.0230936	1.54	UP
800	102169208	LOC102169208	14.82 ± 0.24	12.42 ± 0.44	9.29 ± 0.22	0.344	0.688	-0.25		0.508459	1	-0.42
801	102169209	LOC102169209	30.86 ± 0.8	27.84 ± 1.12	25.31 ± 1.44	0.475	0.95	-0.15		0.710023	1	-0.14
802	102169214	ZNF792	2.12 ± 0.05	1.45 ± 0.03	1.13 ± 0.02	0.0916	0.1832	-0.55		0.808253	1	-0.36
803	102169222	GDPGP1	3.62 ± 0.16	3.3 ± 0.19	3.91 ± 0.14	0.705	1	-0.14		0.498305	0.996609	0.25
804	102169223	LOC102169223	63.06 ± 2.53	94.79 ± 1.1	85.51 ± 1.17	0.00129	0.00258	0.59		0.516577	1	-0.15
805	102169227	C21H14orf142	18.47 ± 0.96	9.62 ± 0.93	13.37 ± 3.85	0.605	1	-0.94		0.360864	0.721728	0.47
806	102169228	METTL5	20.2 ± 0.81	17.88 ± 0.7	16.45 ± 0.16	0.785	1	-0.18		0.926917	1	-0.12
807	102169233	UBR2	4.72 ± 0.43	3.84 ± 0.01	3.49 ± 0.01	0.155	0.31	-0.3		0.890824	1	-0.14
808	102169239	FAM234A	301.37 ± 11.14	286.5 ± 8.95	292.34 ± 6.82	0.786	1	-0.07		0.886735	1	0.03
809	102169240	NOXO1	37.13 ± 3.33	9.99 ± 0.38	19.28 ± 0.84	0.00038	0.00076	-1.89	DN	0.0109825	0.0219651	0.95
810	102169241	ZC3H7A	8.77 ± 0.3	7.93 ± 0.07	5.62 ± 0.09	0.513	1	-0.15		0.648463	1	-0.49
811	102169247	SFPQ	10.83 ± 0.65	14.46 ± 0.29	12.57 ± 0.22	0.0231	0.0462	0.42		0.781554	1	-0.2
812	102169248	C1GALT1	7.85 ± 0.35	8.23 ± 0.2	7.37 ± 0.54	0.774	1	0.07		0.89852	1	-0.16
813	102169250	SRPK2	20.47 ± 0.28	17.23 ± 0.19	22.9 ± 0.32	0.2	0.4	-0.25		0.274779	0.549558	0.41
814	102169251	NT5C3A	18.96 ± 0.58	12.02 ± 0.45	18.99 ± 1.17	0.00038	0.00076	-0.66		0.17694	0.35388	0.66
815	102169255	LOC102169255	0.67 ± 0.03	1.14 ± 0.08	1.38 ± 0.06	0.762	1	0.77		1	1	0.28
816	102169258	RASSF4	1.91 ± 0.26	0.96 ± 0.12	1.33 ± 0.13	0.00038	0.00076	-0.99		1	1	0.47
817	102169259	WNT10B	2.84 ± 0.2	1.85 ± 0.06	2.09 ± 0.18	0.0722	0.1444	-0.62		1	1	0.18
818	102169264	TSPAN6	34.16 ± 1.7	40.83 ± 1.54	45.31 ± 1.04	0.205	0.41	0.26		0.761932	1	0.15
819	102169269	SGCB	1.72 ± 0.2	2.15 ± 0.19	2.23 ± 0.03	0.291	0.582	0.32		1	1	0.06
820	102169270	BOD1L1	2.61 ± 0.04	2.77 ± 0.09	2.16 ± 0.08	0.716	1	0.09		0.422172	0.844343	-0.36
821	102169273	C7H19orf60	32.77 ± 1.27	47.2 ± 1.07	47.91 ± 1.82	0.0286	0.0572	0.53		0.99763	1	0.02
822	102169275	FBXL14	1.91 ± 0.17	2.8 ± 0.22	2.43 ± 0.05	0.238	0.476	0.56		0.530118	1	-0.21
823	102169276	NFIX	12.05 ± 0.42	8.73 ± 0.29	9.23 ± 0.63	0.0233	0.0466	-0.47		0.942863	1	0.08
824	102169278	MCOLN1	18.98 ± 0.27	11.54 ± 0.17	19.88 ± 0.74	0.00038	0.00076	-0.72		0.0786798	0.15736	0.78
825	102169282	PAIP2	74.32 ± 2.29	50.66 ± 1.58	60.99 ± 2.68	0.00206	0.00412	-0.55		0.168321	0.336642	0.27
826	102169284	LARS	15.71 ± 0.69	20.33 ± 0.31	17.29 ± 0.21	0.0464	0.0928	0.37		0.687194	1	-0.23
827	102169288	C8H4orf27	13.83 ± 0.28	23.28 ± 0.6	17.37 ± 0.33	0.00038	0.00076	0.75		0.236287	0.472574	-0.42
828	102169289	HMGN3	31.07 ± 1.31	36.21 ± 1.45	27.1 ± 0.64	0.331	0.662	0.22		0.128008	0.256016	-0.42
829	102169291	ATG5	8.61 ± 0.07	9.53 ± 0.25	9.58 ± 0.34	0.523	1	0.15		0.914837	1	0.01
830	102169292	LRP11	2.03 ± 0.23	4.57 ± 0.07	2.96 ± 0.12	0.00038	0.00076	1.17	UP	0.552858	1	-0.63
831	102169293	SMAD3	4.25 ± 0.27	2.12 ± 0.1	2.89 ± 0.18	0.0023	0.0046	-1	DN	0.422171	0.844342	0.45
832	102169296	ATP6V1D	58.23 ± 3.34	60.46 ± 0.21	60.92 ± 2.57	0.82	1	0.05		1	1	0.01
833	102169297	PGF	2.12 ± 0.14	2 ± 0.14	1.1 ± 0.11	0.868	1	-0.08		0.298903	0.597806	-0.86
834	102169300	REL	1.02 ± 0.04	1.63 ± 0.06	1.2 ± 0.06	0.093	0.186	0.67		0.298903	0.597806	-0.44
835	102169302	NCOA1	5.16 ± 0.16	4.81 ± 0.31	5.76 ± 0.14	0.659	1	-0.1		0.914837	1	0.26
836	102169304	LOC102169304	7.57 ± 1.28	6.04 ± 0.62	3.81 ± 0.28	0.208	0.416	-0.33		0.46303	0.92606	-0.66
837	102169309	LOC102169309	10.04 ± 0.62	15.88 ± 0.65	12.64 ± 0.51	0.0182	0.0364	0.66		0.557499	1	-0.33
838	102169310	ZGPAT	18.28 ± 1.03	27.98 ± 0.83	25.22 ± 0.74	0.00101	0.00202	0.61		0.784206	1	-0.15
839	102169311	DERL1	22.77 ± 0.31	27.26 ± 0.75	26.1 ± 0.15	0.183	0.366	0.26		0.909446	1	-0.06
840	102169313	LOC102169313	3.17 ± 0.18	2.27 ± 0.19	1.64 ± 0.1	0.194	0.388	-0.48		1	1	-0.47
841	102169314	LOC102169314	1.78 ± 0.24	1.78 ± 0.2	1.34 ± 0.25	0.979	1	0		0.560743	1	-0.41
842	102169316	TMEM25	3.55 ± 0.14	2.57 ± 0.11	2.45 ± 0.04	0.123	0.246	-0.46		0.631914	1	-0.07
843	102169319	LOC102169319	1.48 ± 0.06	1.71 ± 0.06	1.35 ± 0.08	0.627	1	0.21		0.298903	0.597806	-0.34
844	102169320	LOC102169320	9.02 ± 0.37	5.9 ± 0.08	7.3 ± 0.09	0.01	0.02	-0.61		0.853714	1	0.31
845	102169321	TRMT2A	17.91 ± 0.96	20.34 ± 0.46	20.51 ± 0.45	0.41	0.82	0.18		0.988674	1	0.01
846	102169324	PIH1D1	14.11 ± 0.9	16.8 ± 0.44	14.61 ± 0.23	0.267	0.534	0.25		0.770893	1	-0.2
847	102169327	ZNF582	1.58 ± 0.03	1.1 ± 0.13	0.79 ± 0.04	0.252	0.504	-0.51		1	1	-0.48
848	102169328	TRAF4	31.5 ± 1.05	49.76 ± 0.81	61.01 ± 0.89	0.00038	0.00076	0.66		0.228504	0.457008	0.29
849	102169329	ARHGDIA	138.53 ± 2.11	147.88 ± 3.19	181.01 ± 5.27	0.692	1	0.09		0.00726174	0.0145235	0.29
850	102169332	RNF157	5.69 ± 0.09	8.99 ± 0.35	12.97 ± 0.61	0.00038	0.00076	0.66		0.369147	0.738294	0.53
851	102169334	CMSS1	5.7 ± 0.45	8.22 ± 0.32	7.28 ± 0.18	0.243	0.486	0.53		0.89852	1	-0.18
852	102169335	SNX4	11.85 ± 0.23	11.22 ± 0.32	10.3 ± 0.52	0.751	1	-0.08		0.890824	1	-0.12
853	102169336	CMBL	944.82 ± 50.24	1476.94 ± 7.24	1703.83 ± 23.1	0.0199	0.0398	0.64		1.07198e-08	2.14e-08	0.21
854	102169341	PDZRN3	2.54 ± 0.62	1.82 ± 0.21	1.29 ± 0.11	0.1	0.2	-0.48		0.298903	0.597806	-0.5
855	102169342	KANSL1L	1.57 ± 0.1	0.97 ± 0.03	1.62 ± 0.05	0.0143	0.0286	-0.69		0.298903	0.597805	0.73
856	102169344	RUVBL1	34.2 ± 2.43	67.82 ± 1.59	49.6 ± 2.3	0.00038	0.00076	0.99		0.00598927	0.0119785	-0.45
857	102169351	TYW3	6.13 ± 0.26	5.52 ± 0.37	4.99 ± 0.26	0.687	1	-0.15		0.87533	1	-0.15
858	102169352	SRCAP	6.15 ± 0.16	5.15 ± 0.23	6.37 ± 0.27	0.186	0.372	-0.26		0.838359	1	0.31
859	102169353	MACF1	14.04 ± 0.12	20.17 ± 1.04	17.85 ± 0.92	0.0107	0.0214	0.52		0.754246	1	-0.18
860	102169354	COPS8	27.51 ± 0.03	33.64 ± 0.64	26.56 ± 0.45	0.135	0.27	0.29		0.330474	0.660948	-0.34
861	102169355	LOC102169355	1.52 ± 0.09	1.22 ± 0.03	1.31 ± 0.01	0.278	0.556	-0.31		1	1	0.09
862	102169356	SEC23IP	7.67 ± 0.26	10.92 ± 0.16	8.8 ± 0.05	0.00725	0.0145	0.51		0.722977	1	-0.31
863	102169358	LOC102169358	3.68 ± 0.12	1.67 ± 0.17	3.1 ± 0.14	0.0353	0.0706	-1.14		0.422171	0.844342	0.89
864	102169359	NCAPG2	1.05 ± 0.04	1.85 ± 0.07	1.09 ± 0.07	0.00038	0.00076	0.82		0.298903	0.597806	-0.76
865	102169360	ATF7	9.61 ± 0.67	5.3 ± 0.13	12.26 ± 0.6	0.00038	0.00076	-0.86		3.91e-05	7.82e-05	1.21	UP
866	102169361	EHD1	23.84 ± 1.11	37.43 ± 1.23	46.6 ± 1.54	0.00038	0.00076	0.65		0.250994	0.501988	0.32
867	102169368	SNCA	1.51 ± 0.13	0.94 ± 0.13	1.54 ± 0.22	0.183	0.366	-0.68		0.391128	0.782256	0.71
868	102169369	TFE3	9.93 ± 0.17	9.1 ± 0.39	11.13 ± 0.25	0.586	1	-0.13		0.723103	1	0.29
869	102169370	ARAF	21.47 ± 0.39	17.02 ± 0.58	26.88 ± 0.71	0.126	0.252	-0.34		0.0477506	0.0955013	0.66
870	102169371	MAOA	59.95 ± 2.21	99.13 ± 1.61	162.41 ± 6.37	0.00038	0.00076	0.73		7.8824e-11	1.576e-10	0.71
871	102169374	CNOT6	4.67 ± 0.31	4.81 ± 0.21	4.65 ± 0.19	0.877	1	0.04		0.988496	1	-0.05
872	102169381	SLURP1	50.14 ± 1.5	36.79 ± 2.13	61.69 ± 3.21	0.0695	0.139	-0.45		0.000628101	0.0012562	0.75
873	102169387	MED23	3.19 ± 0.1	3.66 ± 0.12	3.16 ± 0.13	0.401	0.802	0.2		0.498305	0.99661	-0.21
874	102169389	SMAD6	5.32 ± 0.29	4.44 ± 0.13	4.42 ± 0.14	0.63	1	-0.26		1	1	-0.01
875	102169391	PPIB	327.01 ± 17.28	384.52 ± 4.31	425.98 ± 11.97	0.274	0.548	0.23		0.0721587	0.144317	0.15
876	102169393	MED22	7.2 ± 0.12	7.15 ± 0.19	5.25 ± 0.17	0.984	1	-0.01		0.609886	1	-0.44
877	102169396	MAF1	62.78 ± 1.66	54.01 ± 1.62	70.77 ± 2.36	0.274	0.548	-0.22		0.0602411	0.120482	0.39
878	102169397	RIPK2	4.27 ± 0.02	6.15 ± 0.31	4.12 ± 0.32	0.0255	0.051	0.53		0.570512	1	-0.58
879	102169398	DENND5A	6.81 ± 0.5	6.55 ± 0.1	5.37 ± 0.29	0.816	1	-0.06		0.846609	1	-0.29
880	102169401	AHCTF1	3.74 ± 0.11	4.34 ± 0.07	3.54 ± 0.08	0.29	0.58	0.22		0.890824	1	-0.3
881	102169403	AGRN	18.5 ± 0.23	7.8 ± 0.24	12.45 ± 0.6	0.00038	0.00076	-1.25	DN	0.304781	0.609563	0.67
882	102169405	PSMD9	34.77 ± 1.97	39.1 ± 0.46	40.7 ± 0.73	0.415	0.83	0.17		0.936795	1	0.06
883	102169406	GUCY1B3	1.17 ± 0.29	1.57 ± 0.21	1.15 ± 0.15	0.278	0.556	0.42		0.391128	0.782257	-0.45
884	102169409	CDK10	12.32 ± 0.51	11.93 ± 0.43	10.35 ± 0.32	0.885	1	-0.05		0.743283	1	-0.21
885	102169412	LOC102169412	0 ± 0	4.32 ± 1.3	2.5 ± 0.17	0.38	0.76	L0		0.346801	0.693603	-0.79
886	102169416	KRT23	23.85 ± 1.86	14.87 ± 0.54	66.5 ± 4.42	0.00038	0.00076	-0.68		4.75784e-20	9.52e-20	2.16	UP
887	102169420	NLN	1.22 ± 0.04	1.64 ± 0.05	1.06 ± 0.04	0.205	0.41	0.42		0.298903	0.597806	-0.62
888	102169424	LINS1	2.08 ± 0.06	2.03 ± 0.1	1.35 ± 0.01	0.939	1	-0.03		0.298903	0.597806	-0.59
889	102169430	STK17B	2.47 ± 0.13	3.17 ± 0.13	3.5 ± 0.06	0.322	0.644	0.36		0.676402	1	0.14
890	102169432	SAYSD1	6.87 ± 0.57	6.06 ± 0.11	5.51 ± 0.31	0.708	1	-0.18		0.920307	1	-0.14
891	102169433	CAPZB	39.03 ± 1.92	49.46 ± 1.53	54.75 ± 1.89	0.0689	0.1378	0.34		0.705804	1	0.15
892	102169434	FLOT1	45.26 ± 2.3	25.5 ± 0.67	49.93 ± 1.04	0.00038	0.00076	-0.83		5.7332e-06	1.146e-05	0.97
893	102169436	UFC1	78.34 ± 6.39	55.84 ± 2.41	70.25 ± 1.46	0.00801	0.01602	-0.49		0.22007	0.44014	0.33
894	102169437	ALDH5A1	5.63 ± 0.18	4.6 ± 0.08	2.88 ± 0.05	0.173	0.346	-0.29		0.609886	1	-0.68
895	102169439	PGLYRP4	12.86 ± 0.52	3.96 ± 0.33	3.64 ± 0.2	0.00038	0.00076	-1.7	DN	0.941225	1	-0.12
896	102169440	POGZ	3.01 ± 0.27	1.98 ± 0.03	2.3 ± 0.07	0.419	0.838	-0.6		1	1	0.22
897	102169441	VPS45	7.09 ± 0.14	6.08 ± 0.23	4.89 ± 0.22	0.34	0.68	-0.22		0.838359	1	-0.31
898	102169446	OMA1	8.02 ± 0.2	8.23 ± 0.07	7.48 ± 0.14	0.898	1	0.04		1	1	-0.14
899	102169447	ELN	10.13 ± 1.43	6.16 ± 0.38	6.22 ± 0.24	0.00038	0.00076	-0.72		0.960347	1	0.01
900	102169448	C25H16orf89	1.2 ± 0.1	1.8 ± 0.07	0.97 ± 0.03	0.248	0.496	0.58		0.298903	0.597806	-0.89
901	102169449	LFNG	5.17 ± 0.08	2.75 ± 0.17	1.47 ± 0.07	0.00365	0.0073	-0.91		0.308822	0.617644	-0.9
902	102169451	TMEM180	11.9 ± 0.25	11.26 ± 0.17	12.66 ± 0.39	0.751	1	-0.08		0.79917	1	0.17
903	102169453	NSMCE4A	15.38 ± 0.32	19.38 ± 0.46	14.62 ± 0.38	0.152	0.304	0.33		0.368729	0.737458	-0.41
904	102169457	VDAC2	441.17 ± 12.45	349.74 ± 3.76	486.19 ± 22.32	0.118	0.236	-0.34		1.83454e-15	3.66e-15	0.48
905	102169459	ANO6	4.8 ± 0.5	3.66 ± 0.14	3.31 ± 0.1	0.101	0.202	-0.39		0.839503	1	-0.15
906	102169461	SSSCA1	9.88 ± 0.59	17.14 ± 0.64	12.02 ± 0.33	0.0144	0.0288	0.79		0.36013	0.72026	-0.51
907	102169462	KLHL13	5.57 ± 0.08	5.8 ± 0.11	7.26 ± 0.22	0.836	1	0.06		0.818674	1	0.32
908	102169464	CCDC134	2.74 ± 0.16	6.13 ± 0.18	2.97 ± 0.13	0.00038	0.00076	1.16	UP	8.61e-08	1.722e-07	-1.04	DN
909	102169465	CD99L2	2.6 ± 0.1	2.57 ± 0.1	1.7 ± 0.15	0.966	1	-0.02		0.616759	1	-0.6
910	102169466	KLHL5	1.17 ± 0.07	1.19 ± 0.02	1.92 ± 0.08	0.948	1	0.03		0.298903	0.597805	0.69
911	102169468	ANXA3	22.47 ± 1	37.44 ± 0.7	27.97 ± 0.53	0.00038	0.00076	0.74		0.206616	0.413232	-0.42
912	102169472	LOX	1.76 ± 0.25	1.59 ± 0.16	1.73 ± 0.16	0.733	1	-0.15		0.560742	1	0.13
913	102169474	IPO9	16.43 ± 0.28	21.46 ± 0.34	20.94 ± 0.95	0.0348	0.0696	0.39		0.990298	1	-0.04
914	102169475	HAPLN1	1.63 ± 0.2	1.38 ± 0.26	1.46 ± 0.37	0.571	1	-0.24		0.650691	1	0.07
915	102169476	UBAP1	14.31 ± 0.19	20.05 ± 0.47	20.52 ± 0.35	0.452	0.904	0.49		0.952407	1	0.03
916	102169478	TULP4	2.58 ± 0.09	1.66 ± 0.07	1.6 ± 0.02	0.00365	0.0073	-0.64		1	1	-0.05
917	102169480	LOC102169480	130.61 ± 7.34	105.45 ± 3.52	125.19 ± 3.21	0.102	0.204	-0.31		0.0857473	0.171495	0.25
918	102169484	VAMP5	17.1 ± 0.79	13.27 ± 0.88	14.64 ± 0.61	0.253	0.506	-0.37		0.961596	1	0.14
919	102169488	ZMYND11	43.04 ± 0.64	26.26 ± 0.23	35.01 ± 0.09	0.00038	0.00076	-0.71		0.179692	0.359384	0.42
920	102169491	FITM2	18.14 ± 0.54	20.18 ± 0.68	25.69 ± 0.37	0.466	0.932	0.15		0.417925	0.83585	0.35
921	102169492	TRAM1	61.66 ± 1.62	67.73 ± 3.16	62.59 ± 2.67	0.531	1	0.14		0.816131	1	-0.11
922	102169493	PTDSS1	16.63 ± 0.24	22.5 ± 0.63	21.82 ± 0.45	0.0182	0.0364	0.44		0.956627	1	-0.04
923	102169495	ARNTL	3.29 ± 0.04	3.06 ± 0.14	3.8 ± 0.04	0.747	1	-0.1		0.498305	0.996609	0.31
924	102169498	TMEM81	1.21 ± 0.05	1.58 ± 0.04	1.2 ± 0.08	0.294	0.588	0.38		0.298903	0.597806	-0.39
925	102169500	SRM	7.82 ± 0.28	16.3 ± 0.27	9.67 ± 0.55	0.00038	0.00076	1.06	UP	0.0963799	0.19276	-0.75
926	102169501	DHX9	16.57 ± 0.07	18.68 ± 0.26	16.99 ± 0.05	0.388	0.776	0.17		0.884127	1	-0.14
927	102169504	TRAPPC2L	13.49 ± 0.16	13.45 ± 0.2	10.16 ± 0.12	0.987	1	0		0.534954	1	-0.4
928	102169505	CIAPIN1	11.05 ± 0.17	27.86 ± 0.62	18.37 ± 0.64	0.00038	0.00076	1.33	UP	0.0779	0.1558	-0.6
929	102169508	SCN1B	1.05 ± 0.09	0.97 ± 0.17	0.75 ± 0.06	0.858	1	-0.12		1	1	-0.38
930	102169510	TUBD1	5.57 ± 0.2	3.08 ± 0.1	4.58 ± 0.26	0.00206	0.00412	-0.85		0.722977	1	0.57
931	102169515	SMIM11A	48.51 ± 1.3	41.24 ± 0.51	54.38 ± 0.57	0.38	0.76	-0.23		0.0892837	0.178567	0.4
932	102169516	MAP2K6	5.53 ± 0.45	1 ± 0.03	1.75 ± 0.02	0.00038	0.00076	-2.47	DN	0.298903	0.597805	0.81
933	102169519	NGRN	19.32 ± 0.87	18.7 ± 0.35	15.01 ± 0.2	0.854	1	-0.05		0.570038	1	-0.32
934	102169520	EIF2A	36.61 ± 0.91	20.7 ± 0.43	32.95 ± 0.32	0.00038	0.00076	-0.82		0.0207371	0.0414742	0.67
935	102169523	LOC102169523	9.99 ± 0.26	11.28 ± 0.24	13.36 ± 0.32	0.468	0.936	0.18		0.800537	1	0.24
936	102169525	BTBD7	4.28 ± 0.09	3.24 ± 0.14	3.73 ± 0.1	0.04	0.08	-0.4		0.498305	0.996609	0.2
937	102169526	PPP2R5C	28.54 ± 0.47	24.23 ± 0.22	27.78 ± 0.98	0.346	0.692	-0.24		0.657333	1	0.2
938	102169527	SEC22C	2.65 ± 0.17	2.19 ± 0.04	3.74 ± 0.24	0.537	1	-0.27		0.181602	0.363204	0.77
939	102169529	APPL1	7.91 ± 0.25	7.56 ± 0.28	5.45 ± 0.14	0.813	1	-0.07		0.598495	1	-0.47
940	102169530	PTPRG	2.89 ± 0.08	1.53 ± 0.07	1.98 ± 0.06	0.00038	0.00076	-0.91		0.706212	1	0.37
941	102169533	TRIM62	4.66 ± 0.16	5.02 ± 0.25	8.53 ± 0.64	0.737	1	0.11		0.274779	0.549558	0.76
942	102169535	E2F3	1.94 ± 0.17	2.26 ± 0.21	2.79 ± 0.2	0.536	1	0.22		0.530118	1	0.3
943	102169537	FARS2	17.64 ± 0.89	21.46 ± 0.62	26.35 ± 1.38	0.17	0.34	0.28		0.584463	1	0.3
944	102169539	GFER	28.89 ± 1.38	32.07 ± 0.68	30.64 ± 0.64	0.526	1	0.15		0.969459	1	-0.07
945	102169540	GSPT1	17.04 ± 0.44	30.45 ± 0.8	19.84 ± 0.35	0.00038	0.00076	0.84		0.0316469	0.0632938	-0.62
946	102169541	ADGRL2	5.52 ± 0.23	5.24 ± 0.13	4.18 ± 0.21	0.782	1	-0.08		0.863008	1	-0.33
947	102169545	ZSCAN25	5.25 ± 0.57	3.73 ± 0.03	4.69 ± 0.22	0.0293	0.0586	-0.49		0.942863	1	0.33
948	102169546	ZMYM6NB	1.92 ± 0.25	1.88 ± 0.14	2.63 ± 0.21	0.976	1	-0.03		0.513173	1	0.48
949	102169548	KMT2E	13.69 ± 0.76	10.82 ± 0.22	10.58 ± 0.12	0.069	0.138	-0.34		0.97986	1	-0.03
950	102169552	GGPS1	5.85 ± 0.32	4.76 ± 0.19	5.31 ± 0.15	0.322	0.644	-0.3		0.988496	1	0.16
951	102169556	CXCL12	4.05 ± 0.73	2.48 ± 0.14	1.6 ± 0.12	0.00513	0.01026	-0.71		0.422997	0.845994	-0.63
952	102169557	ADCY6	22.58 ± 0.67	17.48 ± 0.63	25.47 ± 0.57	0.0478	0.0956	-0.37		0.198013	0.396026	0.54
953	102169558	TSFM	58.89 ± 3.54	84.21 ± 1.44	87.78 ± 0.29	0.0043	0.0086	0.52		0.876469	1	0.06
954	102169560	NABP2	31.84 ± 0.89	22.84 ± 0.53	31.78 ± 1.26	0.013	0.026	-0.48		0.0919262	0.183852	0.48
955	102169562	BLOC1S1	163.07 ± 13.95	195.92 ± 5.79	214.03 ± 7.7	0.18	0.36	0.26		0.609886	1	0.13
956	102169565	PLEKHA5	11.5 ± 0.14	7.42 ± 0.16	10.56 ± 0.19	0.00038	0.00076	-0.63		0.422796	0.845592	0.51
957	102169566	CDCA3	1.15 ± 0.09	2.68 ± 0.09	3.02 ± 0.08	0.143	0.286	1.22		1	1	0.17
958	102169567	PNPLA3	0.63 ± 0.04	1.22 ± 0.11	2.48 ± 0.06	0.00387	0.00774	0.96		1.9e-08	3.8e-08	1.02	UP
959	102169568	SYNPO2	9.08 ± 2.85	8.5 ± 1.11	1.77 ± 0.03	0.746	1	-0.09		0.00703873	0.0140775	-2.26	DN
960	102169571	CPEB2	10.15 ± 0.69	8.64 ± 0.42	9.38 ± 0.19	0.261	0.522	-0.23		0.90985	1	0.12
961	102169574	LOC102169574	2.15 ± 0.13	1.92 ± 0.07	1.69 ± 0.1	0.684	1	-0.16		1	1	-0.18
962	102169575	RAB3A	1.13 ± 0.08	1.18 ± 0.1	0.99 ± 0.11	0.93	1	0.06		1	1	-0.26
963	102169580	LOC102169580	1.77 ± 0.12	2.39 ± 0.05	1.61 ± 0.04	0.163	0.326	0.44		0.861115	1	-0.57
964	102169581	ADAT3	2.19 ± 0.12	2.52 ± 0.24	3.31 ± 0.06	0.867	1	0.2		0.762604	1	0.39
965	102169590	MFAP3L	3.33 ± 0.2	1.75 ± 0.06	5.3 ± 0.32	0.00038	0.00076	-0.93		0.000167858	0.000335716	1.6	UP
966	102169592	UBR1	3.17 ± 0.15	2.79 ± 0.06	2.85 ± 0.07	0.42	0.84	-0.18		1	1	0.03
967	102169594	POMT2	6.82 ± 0.3	6.87 ± 0.23	8.82 ± 0.18	0.97	1	0.01		0.677034	1	0.36
968	102169595	ZC3H8	3.49 ± 0.12	5.28 ± 0.12	2.36 ± 0.11	0.0481	0.0962	0.6		7.41e-05	0.0001482	-1.16	DN
969	102169596	DOK1	1.61 ± 0.06	0.96 ± 0.14	0.67 ± 0.03	0.113	0.226	-0.74		1	1	-0.52
970	102169598	PUS10	2.06 ± 0.12	1.59 ± 0.04	1.73 ± 0.02	0.556	1	-0.37		1	1	0.12
971	102169600	RBM18	7.8 ± 0.17	8.6 ± 0.16	8.16 ± 0.38	0.572	1	0.14		0.994658	1	-0.08
972	102169601	AK1	8.18 ± 0.58	6.93 ± 0.6	5.37 ± 0.12	0.559	1	-0.24		0.673171	1	-0.37
973	102169603	ZDHHC20	16.07 ± 0.4	18.54 ± 0.34	16.86 ± 0.14	0.305	0.61	0.21		0.839503	1	-0.14
974	102169605	FBXO18	9.95 ± 0.18	10.54 ± 0.28	12.5 ± 0.31	0.703	1	0.08		0.816131	1	0.25
975	102169607	TNFRSF6B	2.26 ± 0.31	6.82 ± 0.33	3.79 ± 0.31	0.00129	0.00258	1.6	UP	0.198262	0.396524	-0.85
976	102169609	EFR3A	17.58 ± 0.79	21.05 ± 0.77	18.63 ± 0.2	0.184	0.368	0.26		0.90925	1	-0.18
977	102169611	IFT46	7.99 ± 0.32	4.16 ± 0.15	3.64 ± 0.11	0.00129	0.00258	-0.94		0.986068	1	-0.19
978	102169613	LIPT2	2.32 ± 0.07	1.29 ± 0.06	2.19 ± 0.22	0.0638	0.1276	-0.84		0.229603	0.459207	0.76
979	102169615	RANBP1	64.79 ± 3.54	110.53 ± 2.1	93.45 ± 2.06	0.00038	0.00076	0.77		0.0959759	0.191952	-0.24
980	102169616	PRMT7	10.91 ± 0.61	13.14 ± 0.16	15.9 ± 0.41	0.226	0.452	0.27		0.630065	1	0.28
981	102169617	ALDH16A1	11.99 ± 0.61	10.28 ± 0.35	14.82 ± 0.7	0.29	0.58	-0.22		0.290695	0.581389	0.53
982	102169620	DHRS13	24.16 ± 0.26	12.67 ± 0.39	16.31 ± 0.15	0.00038	0.00076	-0.93		0.559604	1	0.36
983	102169621	TP53	23.9 ± 0.42	26.59 ± 0.5	25.93 ± 0.86	0.466	0.932	0.15		0.982158	1	-0.04
984	102169622	LOC102169622	2.16 ± 0.07	2.34 ± 0.05	2.88 ± 0.11	0.762	1	0.11		0.422171	0.844342	0.3
985	102169628	POPDC2	1.05 ± 0.34	1.71 ± 0.77	0 ± 0	0.445	0.89	0.7		0.0541548	0.10831	H0
986	102169629	OSBPL11	2.92 ± 0.11	2.98 ± 0.06	3 ± 0.11	0.925	1	0.03		1	1	0.01
987	102169633	HEMK1	6.15 ± 0.2	5.25 ± 0.09	5.93 ± 0.08	0.406	0.812	-0.23		0.838359	1	0.18
988	102169634	LOC102169634	12.25 ± 0.66	16.26 ± 0.69	21.45 ± 0.82	0.0513	0.1026	0.41		0.399309	0.798618	0.4
989	102169636	TINAGL1	38.08 ± 1.62	40.32 ± 0.63	58.98 ± 2.46	0.71	1	0.08		0.028661	0.057322	0.55
990	102169639	MIB1	4.97 ± 0.3	3.52 ± 0.1	4 ± 0.05	0.00931	0.01862	-0.5		0.986068	1	0.18
991	102169642	BCL7C	57.67 ± 4.83	50.02 ± 1.39	64.64 ± 3.78	0.351	0.702	-0.21		0.0582426	0.116485	0.37
992	102169643	COL6A3	2.19 ± 0.52	1.41 ± 0.13	0.95 ± 0.11	0.00629	0.01258	-0.63		0.505043	1	-0.57
993	102169646	LARP4	5.5 ± 0.25	10.79 ± 0.3	7.51 ± 0.12	0.00038	0.00076	0.97		0.452126	0.904251	-0.52
994	102169649	ATG2A	4.61 ± 0.14	3.4 ± 0.15	3.84 ± 0.17	0.0325	0.065	-0.44		0.839503	1	0.18
995	102169650	CCND1	6.52 ± 0.53	9.62 ± 0.31	5.25 ± 0.12	0.00407	0.00814	0.56		0.138923	0.277846	-0.87
996	102169651	TM7SF3	25.59 ± 0.7	13.1 ± 0.26	21.3 ± 0.33	0.00038	0.00076	-0.97		0.0516339	0.103268	0.7
997	102169658	TAB3	6.73 ± 0.28	6.94 ± 0.16	7.07 ± 0.1	0.856	1	0.04		1	1	0.03
998	102169659	RAB9A	24.28 ± 0.83	21.87 ± 0.43	24.33 ± 0.16	0.513	1	-0.15		0.812662	1	0.15
999	102169664	LYRM7	2.59 ± 0.19	2.49 ± 0.09	2.35 ± 0.19	0.859	1	-0.06		0.861115	1	-0.08
1000	102169665	ZNF354A	4.28 ± 0.13	3.11 ± 0.14	1.81 ± 0.12	0.0902	0.1804	-0.46		0.422172	0.844343	-0.78
1001	102169669	ABHD17B	14.41 ± 0.42	12.07 ± 0.57	17.22 ± 1.24	0.236	0.472	-0.26		0.400201	0.800401	0.51
1002	102169674	TMEM253	0.87 ± 0.09	1.21 ± 0.12	1.62 ± 0.08	0.441	0.882	0.46		0.298903	0.597805	0.43
1003	102169675	SCG5	1.79 ± 0.01	1.22 ± 0.1	1.41 ± 0.15	0.285	0.57	-0.56		1	1	0.21
1004	102169676	FAM96A	58.05 ± 3.25	57.25 ± 0.68	66.16 ± 0.93	0.936	1	-0.02		0.421489	0.842978	0.21
1005	102169677	LEO1	9.24 ± 0.9	12.46 ± 0.3	10.46 ± 0.33	0.0353	0.0706	0.43		0.755257	1	-0.25
1006	102169679	RPL7A	2667.59 ± 201.39	2677.87 ± 39.51	3606.05 ± 108.24	0.989	1	0.01		2.25645e-53	4.52e-53	0.43
1007	102169681	LOC102169681	6.29 ± 0.24	5.21 ± 0.21	4.8 ± 0.21	0.185	0.37	-0.27		0.988496	1	-0.12
1008	102169684	SHARPIN	22.66 ± 0.64	23.87 ± 0.56	31.96 ± 1.68	0.749	1	0.08		0.26188	0.52376	0.42
1009	102169689	SAMD11	1.5 ± 0.1	1.34 ± 0.07	1.62 ± 0.18	0.745	1	-0.16		0.391128	0.782256	0.27
1010	102169693	MAPKAPK5	4.97 ± 0.14	6.3 ± 0.13	5.05 ± 0.07	0.0928	0.1856	0.34		0.806731	1	-0.32
1011	102169697	CALM3	64.19 ± 2.67	74.08 ± 0.28	96.29 ± 1.58	0.307	0.614	0.21		0.0132999	0.0265998	0.38
1012	102169698	LOC102169698	3.55 ± 0.39	14.51 ± 0.78	7.21 ± 0.19	0.00038	0.00076	2.03	UP	0.00404286	0.00808573	-1.01	DN
1013	102169699	LOC102169699	2.29 ± 0.75	2.28 ± 0.28	1.91 ± 0.53	1	1	0		0.862395	1	-0.26
1014	102169702	LOC102169702	4.82 ± 0.26	1.83 ± 0.11	5.26 ± 0.36	0.00038	0.00076	-1.4	DN	3.73e-06	7.46e-06	1.53	UP
1015	102169705	BCL6	20.07 ± 0.47	12.69 ± 0.53	26.97 ± 1.28	0.00038	0.00076	-0.66		0.000504902	0.0010098	1.09	UP
1016	102169706	TTC14	5.44 ± 0.28	5.96 ± 0.16	3 ± 0.22	0.614	1	0.13		0.258014	0.516028	-0.99
1017	102169708	AMOTL2	7.48 ± 0.1	5.79 ± 0.05	6.79 ± 0.18	0.0639	0.1278	-0.37		0.853714	1	0.23
1018	102169710	PWP2	3.23 ± 0.09	6.19 ± 0.17	3.9 ± 0.14	0.00038	0.00076	0.94		0.493092	0.986183	-0.67
1019	102169716	IER3	143.82 ± 5.64	95.65 ± 0.64	162.29 ± 3.22	0.00101	0.00202	-0.59		1.51611e-12	3.04e-12	0.76
1020	102169720	ATP8B1	8.89 ± 0.2	7.75 ± 0.24	8.87 ± 0.64	0.335	0.67	-0.2		0.905218	1	0.19
1021	102169722	TGFBR3	2.46 ± 0.57	1.6 ± 0.15	1.47 ± 0.15	0.0125	0.025	-0.62		0.846871	1	-0.12
1022	102169723	CDKN2C	6.5 ± 0.36	5.74 ± 0.25	5.17 ± 0.06	0.604	1	-0.18		0.838359	1	-0.15
1023	102169724	EEF2KMT	2.86 ± 0.23	4.67 ± 0.09	3.48 ± 0.19	0.181	0.362	0.71		0.634664	1	-0.43
1024	102169727	ACTR1A	34.02 ± 0.85	46.82 ± 0.94	43.78 ± 0.28	0.0122	0.0244	0.46		0.811916	1	-0.1
1025	102169728	RAPGEF5	2.67 ± 0.14	1.6 ± 0.07	2.78 ± 0.19	0.00725	0.0145	-0.74		0.422171	0.844342	0.8
1026	102169729	PCGF6	3.77 ± 0.09	3.58 ± 0.11	2.81 ± 0.05	0.845	1	-0.07		0.498305	0.99661	-0.35
1027	102169732	PDGFRL	1.82 ± 0.19	1.47 ± 0.04	0.91 ± 0.16	0.49	0.98	-0.31		0.505043	1	-0.69
1028	102169733	ASAH1	33.54 ± 1.26	37.25 ± 0.67	33.92 ± 1.33	0.473	0.946	0.15		0.81064	1	-0.14
1029	102169734	PTN	4.97 ± 0.22	4.3 ± 0.39	6.64 ± 0.2	0.525	1	-0.21		0.487687	0.975374	0.63
1030	102169735	ARID5B	7.89 ± 0.34	4.36 ± 0.12	10.36 ± 0.03	0.00038	0.00076	-0.85		2.37e-06	4.74e-06	1.25	UP
1031	102169741	FAM89B	9.85 ± 0.22	14.81 ± 0.12	12.81 ± 0.37	0.0202	0.0404	0.59		0.717759	1	-0.21
1032	102169742	THOC2	5.31 ± 0.16	4.33 ± 0.08	4.23 ± 0.15	0.165	0.33	-0.29		1	1	-0.03
1033	102169743	TSPAN9	3.37 ± 0.27	1.75 ± 0.28	3.6 ± 0.92	0.0464	0.0928	-0.95		0.0147443	0.0294886	1.04	UP
1034	102169744	CENPM	1.61 ± 0.04	2.22 ± 0.11	1.87 ± 0.04	0.283	0.566	0.47		1	1	-0.25
1035	102169745	HMGB3	4.21 ± 0.4	6.84 ± 0.25	2.84 ± 0.33	0.0786	0.1572	0.7		6.7e-22	1.34e-21	-1.27	DN
1036	102169752	SRFBP1	1.49 ± 0.06	2.05 ± 0.15	1.47 ± 0.21	0.304	0.608	0.45		0.706212	1	-0.48
1037	102169754	GEMIN7	22.48 ± 1.81	28.45 ± 0.83	22.33 ± 1.01	0.147	0.294	0.34		0.33517	0.670339	-0.35
1038	102169755	SHISA4	21.13 ± 1.63	9.49 ± 0.44	11.83 ± 0.78	0.0122	0.0244	-1.15	DN	0.734661	1	0.32
1039	102169757	TSTD2	6.38 ± 0.15	5.53 ± 0.07	5.62 ± 0.07	0.35	0.7	-0.21		0.990335	1	0.02
1040	102169758	NUDT2	50.08 ± 4.66	30.13 ± 0.78	51.27 ± 0.37	0.00038	0.00076	-0.73		0.000294383	0.000588766	0.77
1041	102169760	PREP	15.59 ± 0.27	23.39 ± 0.54	22.1 ± 0.78	0.00129	0.00258	0.59		0.920307	1	-0.08
1042	102169762	HMGCR	7.29 ± 0.17	17.01 ± 0.34	7.91 ± 0.3	0.00038	0.00076	1.22	UP	0.00821888	0.0164378	-1.11	DN
1043	102169763	TIMM9	10.85 ± 0.32	16.01 ± 0.34	11.25 ± 0.26	0.0311	0.0622	0.56		0.260761	0.521522	-0.51
1044	102169766	VAMP8	99.5 ± 8.12	98.11 ± 1.63	93.82 ± 2.92	0.936	1	-0.02		0.980628	1	-0.06
1045	102169767	WDR43	7.98 ± 0.16	14.28 ± 0.11	10.22 ± 0.2	0.00038	0.00076	0.84		0.395667	0.791334	-0.48
1046	102169772	ACSS2	22.55 ± 0.7	20.31 ± 0.56	27.26 ± 1.13	0.475	0.95	-0.15		0.328158	0.656316	0.42
1047	102169778	DCUN1D5	5 ± 0.22	8.55 ± 0.14	4.97 ± 0.16	0.00949	0.01898	0.77		0.308206	0.616411	-0.78
1048	102169781	ELF5	19.48 ± 0.66	9.88 ± 0.14	13.72 ± 0.76	0.00038	0.00076	-0.98		0.537631	1	0.47
1049	102169784	SLC19A2	1.9 ± 0.18	2.76 ± 0.04	2.33 ± 0.2	0.0759	0.1518	0.54		0.530118	1	-0.25
1050	102169789	HNRNPUL1	57.64 ± 1.56	41.76 ± 1.16	70.18 ± 3.08	0.0125	0.025	-0.46		2.08451e-05	4.16e-05	0.75
1051	102169794	RECQL5	4.42 ± 0.02	3.2 ± 0.24	3.62 ± 0.12	0.427	0.854	-0.47		0.890824	1	0.18
1052	102169799	CCT5	41.44 ± 1.3	102.97 ± 2.04	75.81 ± 2.16	0.00038	0.00076	1.31	UP	0.00102849	0.00205698	-0.44
1053	102169800	VPS33B	5.91 ± 0.04	4.47 ± 0.15	5.61 ± 0.06	0.065	0.13	-0.4		0.680958	1	0.33
1054	102169801	RNF13	22.34 ± 0.68	18.92 ± 0.5	23.75 ± 1.64	0.231	0.462	-0.24		0.487687	0.975374	0.33
1055	102169803	CEP63	1.75 ± 0.18	1.53 ± 0.04	1.39 ± 0.09	0.654	1	-0.2		0.298903	0.597806	-0.13
1056	102169805	PRMT2	12.03 ± 0.55	5.04 ± 0.19	10.52 ± 0.31	0.00038	0.00076	-1.26	DN	0.000231883	0.000463766	1.06	UP
1057	102169809	HESX1	1.65 ± 0.04	1.29 ± 0.11	1.1 ± 0.06	0.453	0.906	-0.36		1	1	-0.23
1058	102169810	RPE	9.37 ± 0.33	14.31 ± 0.19	12.7 ± 0.33	0.0382	0.0764	0.61		0.816131	1	-0.17
1059	102169811	DENND6A	2.39 ± 0.23	2.45 ± 0.13	2.17 ± 0.09	0.965	1	0.04		0.616759	1	-0.18
1060	102169813	TBCC	20.74 ± 0.61	21.2 ± 0.32	21.56 ± 0.66	0.896	1	0.03		0.989832	1	0.02
1061	102169814	RNF19B	14.01 ± 0.15	9.45 ± 0.13	18.93 ± 0.49	0.0043	0.0086	-0.57		0.00546236	0.0109247	1	UP
1062	102169815	LOC102169815	3.72 ± 0.1	1.63 ± 0.08	1.81 ± 0.07	0.00101	0.00202	-1.19	DN	0.854129	1	0.15
1063	102169817	FLAD1	17.36 ± 0.94	21.23 ± 0.38	21.39 ± 0.59	0.152	0.304	0.29		0.990298	1	0.01
1064	102169819	ARHGDIG	1.23 ± 0.09	1.08 ± 0.1	0.85 ± 0.18	0.751	1	-0.2		1	1	-0.34
1065	102169820	ZNF598	9.55 ± 0.09	13.49 ± 0.47	8.26 ± 0.25	0.00038	0.00076	0.5		0.176329	0.352658	-0.71
1066	102169821	CRYZ	36.79 ± 2.06	38.45 ± 0.89	42.8 ± 1.3	0.786	1	0.06		0.753304	1	0.15
1067	102169822	LOC102169822	5.56 ± 0.49	6.28 ± 0.4	5.52 ± 0.36	0.858	1	0.18		0.761315	1	-0.19
1068	102169823	CPSF4	6.61 ± 0.29	10.45 ± 0.12	7.39 ± 0.1	0.00744	0.01488	0.66		0.486676	0.973352	-0.5
1069	102169826	MIOS	5.21 ± 0.13	6.61 ± 0.16	5.28 ± 0.1	0.13	0.26	0.34		0.702745	1	-0.32
1070	102169827	PUS7	5.22 ± 0.27	8.55 ± 0.09	5.13 ± 0.04	0.000707	0.001414	0.71		0.274779	0.549558	-0.74
1071	102169828	WDR11	6.93 ± 0.14	5.75 ± 0.03	6.32 ± 0.05	0.198	0.396	-0.27		1	1	0.14
1072	102169829	GARS	25.93 ± 0.3	46.12 ± 1.21	44.76 ± 1.37	0.00038	0.00076	0.83		0.941225	1	-0.04
1073	102169831	TBCE	21.77 ± 1.12	19.15 ± 0.66	15.41 ± 0.59	0.531	1	-0.19		0.487687	0.975374	-0.31
1074	102169839	ITGA7	3.43 ± 1.11	4.5 ± 0.61	4.29 ± 0.85	0.135	0.27	0.39		0.853714	1	-0.07
1075	102169842	SAMM50	178.6 ± 12.18	148.44 ± 2.74	253.4 ± 12.51	0.202	0.404	-0.27		6.31247e-20	1.262e-19	0.77
1076	102169850	LOC102169850	2.83 ± 0.14	3.03 ± 0.12	2.92 ± 0.22	0.854	1	0.1		1	1	-0.05
1077	102169854	MPV17L2	7.38 ± 0.54	24.69 ± 0.98	13.67 ± 0.17	0.00038	0.00076	1.74	UP	0.0168453	0.0336907	-0.85
1078	102169855	LOC102169855	3.66 ± 0.75	3.37 ± 0.54	0.96 ± 0.2	0.829	1	-0.12		0.0004229	0.0008458	-1.81	DN
1079	102169856	FARSA	13.44 ± 0.63	27.81 ± 0.96	22.4 ± 1.12	0.00038	0.00076	1.05	UP	0.522812	1	-0.31
1080	102169859	MED15	18.93 ± 0.39	14.33 ± 0.31	15.34 ± 0.44	0.0625	0.125	-0.4		0.963424	1	0.1
1081	102169860	CSNK1G2	19.77 ± 0.77	28.93 ± 0.8	30.91 ± 0.75	0.00254	0.00508	0.55		0.866653	1	0.1
1082	102169862	SPATA24	6.34 ± 0.61	4.97 ± 0.27	6.09 ± 0.31	0.295	0.59	-0.35		0.800537	1	0.3
1083	102169864	TCERG1	4.8 ± 0.26	8.18 ± 0.12	4.51 ± 0.16	0.00038	0.00076	0.77		0.33517	0.670339	-0.86
1084	102169869	IFT74	6.91 ± 0.29	6.86 ± 0.24	4.37 ± 0.31	0.97	1	-0.01		0.381212	0.762424	-0.65
1085	102169871	MCM9	2.67 ± 0.11	1.89 ± 0.05	2.52 ± 0.07	0.152	0.304	-0.5		0.732924	1	0.42
1086	102169872	ENPP3	74.18 ± 6.19	91.73 ± 0.13	83.57 ± 0.75	0.144	0.288	0.31		0.575898	1	-0.13
1087	102169873	CCNDBP1	25.48 ± 0.89	22.78 ± 0.47	25.4 ± 0.92	0.437	0.874	-0.16		0.767181	1	0.16
1088	102169874	SNX1	9.26 ± 0.13	7.75 ± 0.08	9.33 ± 0.16	0.192	0.384	-0.26		0.784206	1	0.27
1089	102169875	PLEK2	61.96 ± 1.86	45.05 ± 1.09	72.68 ± 1.97	0.129	0.258	-0.46		0.0001082	0.0002164	0.69
1090	102169876	GSTZ1	19.23 ± 1.38	14.06 ± 0.17	25.09 ± 0.87	0.0424	0.0848	-0.45		0.011114	0.022228	0.84
1091	102169877	PEX13	9.08 ± 0.16	11.55 ± 0.19	10.29 ± 0.67	0.112	0.224	0.35		0.897239	1	-0.17
1092	102169878	MRRF	14.35 ± 0.68	14.62 ± 0.41	15.73 ± 0.35	0.928	1	0.03		0.963982	1	0.11
1093	102169879	ST6GALNAC6	1.9 ± 0.29	1.4 ± 0.17	1.65 ± 0.08	0.249	0.498	-0.44		0.298903	0.597805	0.24
1094	102169880	MICU2	35.9 ± 1.15	32.24 ± 0.33	30.85 ± 0.78	0.465	0.93	-0.15		0.938725	1	-0.06
1095	102169881	SAP18	32.98 ± 0.1	37.83 ± 0.97	33.05 ± 0.41	0.321	0.642	0.2		0.578325	1	-0.2
1096	102169884	NAA20	83.93 ± 1.47	105.55 ± 2.24	106.88 ± 3.06	0.0756	0.1512	0.33		0.982686	1	0.02
1097	102169885	GMEB2	5.73 ± 0.08	4.85 ± 0.15	4.46 ± 0.12	0.416	0.832	-0.24		0.988496	1	-0.12
1098	102169890	RNF169	3.18 ± 0.17	2.16 ± 0.05	2.14 ± 0.02	0.0168	0.0336	-0.56		1	1	-0.01
1099	102169891	PATL1	17.7 ± 0.54	13.05 ± 0.3	16.2 ± 0.76	0.0218	0.0436	-0.44		0.630356	1	0.31
1100	102169894	ZFP90	4.05 ± 0.17	2.57 ± 0.12	2.53 ± 0.17	0.222	0.444	-0.66		0.878072	1	-0.02
1101	102169895	FLT3LG	3.76 ± 0.22	4.02 ± 0.2	4.92 ± 0.2	0.846	1	0.1		0.816131	1	0.29
1102	102169899	SEZ6	4.84 ± 0.1	9.77 ± 0.36	1.63 ± 0.09	0.00038	0.00076	1.01	UP	0.000416054	0.000832108	-2.58	DN
1103	102169900	WRAP53	9.32 ± 0.43	10.49 ± 0.3	9.55 ± 0.25	0.482	0.964	0.17		0.890824	1	-0.14
1104	102169901	SNX11	7.66 ± 0.23	9.98 ± 0.11	8.52 ± 0.12	0.185	0.37	0.38		0.824872	1	-0.23
1105	102169902	P4HB	596.29 ± 25.2	501.05 ± 19.44	502.92 ± 14.98	0.393	0.786	-0.25		0.769692	1	0.01
1106	102169904	SCAF4	6.17 ± 0.08	5.99 ± 0.21	6.46 ± 0.15	0.869	1	-0.04		0.960347	1	0.11
1107	102169905	GALR2	42.82 ± 0.64	20.13 ± 0.87	37.64 ± 1.16	0.00038	0.00076	-1.09	DN	0.000482662	0.000965324	0.9
1108	102169907	PCNP	25.89 ± 1.17	29.75 ± 0.87	26.8 ± 0.76	0.318	0.636	0.2		0.816131	1	-0.15
1109	102169914	KLHL23	1.08 ± 0.36	1.51 ± 0.23	1.15 ± 0.08	0.225	0.45	0.49		0.6434	1	-0.4
1110	102169916	CXCR4	3.53 ± 0.5	1.17 ± 0.17	0.77 ± 0.07	0.00038	0.00076	-1.59	DN	1	1	-0.61
1111	102169918	HECW2	8.8 ± 0.25	5.12 ± 0.23	7.68 ± 0.29	0.00038	0.00076	-0.78		0.383144	0.766288	0.58
1112	102169919	CASP8	4.04 ± 0.12	3.04 ± 0.15	2.77 ± 0.07	0.13	0.26	-0.41		1	1	-0.13
1113	102169920	ZBTB9	3.38 ± 0.11	4.44 ± 0.18	3.42 ± 0.06	0.137	0.274	0.39		0.736683	1	-0.38
1114	102169921	SERINC2	29.35 ± 0.63	36.83 ± 0.86	42.95 ± 2.59	0.0871	0.1742	0.33		0.345979	0.691958	0.22
1115	102169924	LOC102169924	12.42 ± 0.71	8.09 ± 0.35	9.36 ± 0.12	0.00552	0.01104	-0.62		0.907965	1	0.21
1116	102169925	SERPINB8	31.64 ± 1.73	39.36 ± 0.52	36.47 ± 1.47	0.113	0.226	0.31		0.816131	1	-0.11
1117	102169926	ESCO1	3.17 ± 0.11	2.55 ± 0.05	2.42 ± 0.25	0.207	0.414	-0.31		0.530118	1	-0.08
1118	102169927	OTUD7B	8.27 ± 0.16	7.2 ± 0.15	7.25 ± 0.17	0.331	0.662	-0.2		1	1	0.01
1119	102169928	PRKAB2	2.76 ± 0.23	2.41 ± 0.23	2.03 ± 0.22	0.709	1	-0.2		0.861115	1	-0.25
1120	102169929	RNPC3	2.13 ± 0.27	1.91 ± 0.04	1.72 ± 0.03	0.763	1	-0.15		1	1	-0.15
1121	102169930	DAB1	3.39 ± 0.03	1.18 ± 0.09	4.23 ± 0.07	0.00038	0.00076	-1.52	DN	3.65e-11	7.3e-11	1.84	UP
1122	102169931	MED8	15.3 ± 0.74	21 ± 0.84	16.4 ± 0.39	0.036	0.072	0.46		0.487687	0.975374	-0.36
1123	102169934	LIPA	5.39 ± 0.24	5.19 ± 0.43	4.81 ± 0.44	0.862	1	-0.05		0.952286	1	-0.11
1124	102169935	LOC102169935	26.37 ± 1.15	52.52 ± 1.05	74.17 ± 2.3	0.00038	0.00076	0.99		0.00752437	0.0150487	0.5
1125	102169938	COMTD1	22.5 ± 1.5	20 ± 0.19	25.61 ± 0.68	0.501	1	-0.17		0.461421	0.922842	0.36
1126	102169939	LIMA1	24.28 ± 2	32.72 ± 1.26	29.45 ± 1.71	0.0177	0.0354	0.43		0.76064	1	-0.15
1127	102169940	CCDC90B	23.16 ± 1.22	21.53 ± 0.21	19.31 ± 1.04	0.654	1	-0.11		0.795102	1	-0.16
1128	102169943	TCEAL8	19.23 ± 0.83	21.89 ± 0.76	18.4 ± 0.76	0.429	0.858	0.19		0.561748	1	-0.25
1129	102169945	MMGT1	10.39 ± 0.91	19.34 ± 0.17	18.56 ± 0.49	0.00591	0.01182	0.9		0.949553	1	-0.06
1130	102169950	PAQR3	4.54 ± 0.28	9.2 ± 0.27	8.14 ± 0.15	0.00038	0.00076	1.02	UP	0.816131	1	-0.18
1131	102169953	LOC102169953	14.37 ± 0.54	13.91 ± 0.41	15.38 ± 0.59	0.843	1	-0.05		0.820509	1	0.14
1132	102169957	PGP	6.24 ± 0.18	16.16 ± 0.26	11.66 ± 0.51	0.00038	0.00076	1.37	UP	0.448985	0.897971	-0.47
1133	102169961	LOC102169961	126.39 ± 8.91	110.89 ± 8.7	141.27 ± 6.64	0.612	1	-0.19		0.000979278	0.00195856	0.35
1134	102169963	AAGAB	10.3 ± 0.34	14.7 ± 0.04	10.12 ± 0.04	0.00591	0.01182	0.51		0.258307	0.516615	-0.54
1135	102169965	ARHGEF40	2.65 ± 0.72	2.29 ± 0.28	1.24 ± 0.06	0.801	1	-0.21		0.175202	0.350405	-0.88
1136	102169968	LOC102169968	1.68 ± 0.02	2.65 ± 0.04	1.79 ± 0.07	0.239	0.478	0.65		0.422172	0.844343	-0.57
1137	102169969	PIGF	14.15 ± 0.13	13.87 ± 0.2	16.52 ± 1.01	0.954	1	-0.03		0.648463	1	0.25
1138	102169971	DOLPP1	6.7 ± 0.17	9.82 ± 0.29	7.68 ± 0.27	0.0104	0.0208	0.55		0.566287	1	-0.35
1139	102169972	SURF1	58.91 ± 4.49	61.12 ± 1.71	72.42 ± 3.61	0.828	1	0.05		0.469231	0.938461	0.24
1140	102169974	EFNB2	1.63 ± 0.23	1.03 ± 0.09	0.8 ± 0.09	0.0442	0.0884	-0.66		1	1	-0.37
1141	102169975	PRNP	47.96 ± 1.65	26.63 ± 0.44	26.33 ± 0.71	0.00038	0.00076	-0.85		0.992082	1	-0.02
1142	102169976	LOC102169976	477.26 ± 27.42	447.13 ± 8.48	645.9 ± 9.59	0.71	1	-0.09		2.79729e-23	5.6e-23	0.53
1143	102169977	TMEM9B	49.45 ± 0.72	59.06 ± 1.73	50.71 ± 1.49	0.185	0.37	0.26		0.383144	0.766288	-0.22
1144	102169982	ISG15	54.53 ± 1.67	28.68 ± 1.13	7.12 ± 0.34	0.00038	0.00076	-0.93		1.70604e-08	3.42e-08	-2.01	DN
1145	102169983	ZBTB17	4.87 ± 0.11	4.78 ± 0.21	5.44 ± 0.05	0.924	1	-0.03		0.988496	1	0.19
1146	102169988	PES1	17.39 ± 1.19	27.93 ± 0.97	23.74 ± 1.2	0.00038	0.00076	0.68		0.710023	1	-0.23
1147	102169989	ACSF3	3.62 ± 0.28	3.56 ± 0.13	5.17 ± 0.18	0.959	1	-0.02		0.816131	1	0.54
1148	102169990	ZNF181	3.46 ± 0.25	2.97 ± 0.08	2.26 ± 0.17	0.466	0.932	-0.22		0.422172	0.844343	-0.39
1149	102169992	ATPAF2	8.71 ± 0.51	28.15 ± 0.35	12.88 ± 0.57	0.00038	0.00076	1.69	UP	0.000360867	0.000721734	-1.13	DN
1150	102170000	C1H21orf33	162.41 ± 11.82	137.55 ± 4.02	204.05 ± 5.52	0.231	0.462	-0.24		1.79448e-07	3.58e-07	0.57
1151	102170001	LOC102170001	1.38 ± 0.08	1.1 ± 0.06	2.07 ± 0.25	0.528	1	-0.33		0.229603	0.459207	0.92
1152	102170002	SS18L2	22.05 ± 1.63	19.44 ± 0.63	18.16 ± 0.51	0.581	1	-0.18		0.930809	1	-0.1
1153	102170008	PQLC2	2.82 ± 0.11	2.79 ± 0.08	1.91 ± 0.17	0.975	1	-0.02		0.422172	0.844343	-0.55
1154	102170012	CDYL	9.6 ± 0.17	11.86 ± 0.2	11.42 ± 0.1	0.152	0.304	0.3		0.981798	1	-0.05
1155	102170013	SORT1	23.68 ± 0.32	17.87 ± 0.46	21.51 ± 0.41	0.0263	0.0526	-0.41		0.618124	1	0.27
1156	102170016	NDUFS5	344.21 ± 36.19	302.74 ± 8.12	380.55 ± 9.65	0.379	0.758	-0.19		4.68636e-05	9.38e-05	0.33
1157	102170017	SNX8	12.39 ± 0.36	10.57 ± 0.37	15.32 ± 0.4	0.435	0.87	-0.23		0.362696	0.725391	0.54
1158	102170018	ARL3	32.75 ± 2.34	38.45 ± 1.05	38.14 ± 0.32	0.299	0.598	0.23		1	1	-0.01
1159	102170019	TAF5	1.18 ± 0.06	1.5 ± 0.06	1.37 ± 0.04	0.795	1	0.35		0.6434	1	-0.13
1160	102170026	NPFF	2.55 ± 0.32	1.66 ± 0.09	2.36 ± 0.1	0.0209	0.0418	-0.63		0.861114	1	0.51
1161	102170030	METTL1	4.35 ± 0.28	10.21 ± 0.14	4.95 ± 0.03	0.00038	0.00076	1.23	UP	0.0200846	0.0401692	-1.04	DN
1162	102170032	RNASEH2C	27.76 ± 0.74	39.2 ± 0.71	41.12 ± 0.9	0.00038	0.00076	0.5		0.817512	1	0.07
1163	102170034	LOC102170034	2.66 ± 0.29	1.54 ± 0.08	2.24 ± 0.14	0.114	0.228	-0.78		0.854129	1	0.54
1164	102170035	XIAP	6.23 ± 0.51	4.58 ± 0.16	4.5 ± 0.11	0.022	0.044	-0.44		0.949212	1	-0.03
1165	102170036	TEAD4	1.87 ± 0.09	0.93 ± 0.07	0.71 ± 0.07	0.0366	0.0732	-1		1	1	-0.39
1166	102170038	SEPSECS	7.39 ± 0.4	4.45 ± 0.17	8.38 ± 0.34	0.0061	0.0122	-0.73		0.213397	0.426794	0.91
1167	102170040	AP1S1	50.97 ± 3.36	48.84 ± 0.48	61.51 ± 0.41	0.797	1	-0.06		0.152942	0.305884	0.33
1168	102170047	LMOD1	24.76 ± 6.21	29.83 ± 3.87	2.89 ± 0.18	0.255	0.51	0.27		1.8791e-15	3.76e-15	-3.37	DN
1169	102170050	TMEM181	17.97 ± 0.93	14.19 ± 0.49	14.46 ± 0.25	0.121	0.242	-0.34		0.999614	1	0.03
1170	102170051	AP1G2	7.65 ± 0.15	6.25 ± 0.26	7.14 ± 0.39	0.344	0.688	-0.29		0.824459	1	0.19
1171	102170052	KIAA0586	1.74 ± 0.08	1.1 ± 0.04	1.29 ± 0.02	0.025	0.05	-0.66		1	1	0.23
1172	102170053	MLH3	3.11 ± 0.06	2.23 ± 0.06	2.47 ± 0.07	0.116	0.232	-0.48		0.861114	1	0.14
1173	102170061	CENPB	23.38 ± 1.11	32.16 ± 0.2	30.85 ± 1.15	0.012	0.024	0.46		0.952407	1	-0.06
1174	102170062	RTFDC1	25.72 ± 1.35	28.39 ± 0.99	30.29 ± 1.22	0.529	1	0.14		0.864413	1	0.09
1175	102170066	DCAF13	11.34 ± 0.17	16.52 ± 0.29	10.12 ± 0.08	0.00365	0.0073	0.54		0.135609	0.271217	-0.71
1176	102170070	PPP2R1B	9.91 ± 0.3	10.9 ± 0.39	10.88 ± 0.27	0.538	1	0.14		0.996818	1	0
1177	102170071	DDX6	24.58 ± 0.57	21.75 ± 0.37	22.44 ± 0.04	0.393	0.786	-0.18		0.977585	1	0.05
1178	102170074	DSTYK	6.17 ± 0.22	4.52 ± 0.08	4.81 ± 0.05	0.0224	0.0448	-0.45		0.905218	1	0.09
1179	102170077	CASZ1	6.69 ± 0.19	6.96 ± 0.35	7.56 ± 0.31	0.819	1	0.06		0.934334	1	0.12
1180	102170079	KIAA0922	5.44 ± 0.15	3.52 ± 0.02	3.69 ± 0.07	0.00181	0.00362	-0.63		0.986068	1	0.07
1181	102170084	NUFIP2	4.94 ± 0.31	5.94 ± 0.18	4.88 ± 0.25	0.174	0.348	0.27		0.838359	1	-0.28
1182	102170085	MIS12	5.86 ± 0.3	8.73 ± 0.23	5.45 ± 0.09	0.0105	0.021	0.57		0.415983	0.831967	-0.68
1183	102170086	KIAA0195	12.41 ± 0.22	7.47 ± 0.33	13.39 ± 0.52	0.000707	0.001414	-0.73		0.106755	0.21351	0.84
1184	102170087	MRPS6	56.81 ± 2.34	66.13 ± 1.23	42.76 ± 0.6	0.299	0.598	0.22		0.00113577	0.00227153	-0.63
1185	102170090	WDR70	6.41 ± 0.35	8.43 ± 0.25	6.71 ± 0.03	0.0833	0.1666	0.39		0.761932	1	-0.33
1186	102170091	LOC102170091	16.81 ± 1.87	14.74 ± 1	21.01 ± 0.64	0.55	1	-0.19		0.17464	0.349281	0.51
1187	102170092	UNC45A	27.99 ± 1.39	29.74 ± 1.13	40.93 ± 2.08	0.694	1	0.09		0.103742	0.207484	0.46
1188	102170094	ANAPC13	40.18 ± 2.92	39 ± 1.01	43.3 ± 0.09	0.864	1	-0.04		0.730649	1	0.15
1189	102170096	DBNL	68.42 ± 4.26	49.88 ± 2	75.17 ± 3.89	0.0123	0.0246	-0.46		0.000633396	0.00126679	0.59
1190	102170099	GLTSCR1L	2.79 ± 0.13	1.61 ± 0.06	1.88 ± 0.03	0.00038	0.00076	-0.8		0.854129	1	0.22
1191	102170101	NIT1	14.72 ± 0.54	13.82 ± 0.11	17.79 ± 0.57	0.725	1	-0.09		0.490608	0.981216	0.36
1192	102170102	DEK	61.54 ± 0.43	52.43 ± 0.89	52.2 ± 2	0.249	0.498	-0.23		0.990335	1	-0.01
1193	102170104	SLC9A3R2	9.27 ± 0.25	11.72 ± 1.26	7.52 ± 0.38	0.401	0.802	0.34		0.246887	0.493773	-0.64
1194	102170106	CD2BP2	44.77 ± 3.15	37.87 ± 1.35	44.58 ± 1.94	0.376	0.752	-0.24		0.405944	0.811888	0.24
1195	102170107	ATP5J2	670.57 ± 71.07	691 ± 12.62	876.48 ± 12.77	0.86	1	0.04		3.45019e-15	6.9e-15	0.34
1196	102170108	ARPC1B	43.2 ± 2.57	53.32 ± 1.41	73.16 ± 3.01	0.115	0.23	0.3		0.0141088	0.0282175	0.46
1197	102170111	LOC102170111	1.16 ± 0.18	1.71 ± 0.43	0.82 ± 0.21	0.819	1	0.56		0.360492	0.720983	-1.06
1198	102170112	ZNRF2	1.58 ± 0.13	2.02 ± 0.11	1.98 ± 0.05	0.316	0.632	0.35		1	1	-0.03
1199	102170119	RNF41	3.33 ± 0.04	3.52 ± 0.1	4.36 ± 0.12	0.81	1	0.08		0.941225	1	0.31
1200	102170122	FGFR1OP2	7.86 ± 0.17	8.2 ± 0.12	10.58 ± 0.51	0.822	1	0.06		0.588431	1	0.37
1201	102170126	SEC24D	2.52 ± 0.24	2.21 ± 0.13	1.84 ± 0.06	0.538	1	-0.19		1	1	-0.27
1202	102170128	RFC1	8.3 ± 0.33	7.11 ± 0.07	5.9 ± 0.27	0.269	0.538	-0.22		0.853714	1	-0.27
1203	102170129	ELK1	8.14 ± 0.33	9.25 ± 0.27	12.22 ± 0.43	0.419	0.838	0.18		0.502479	1	0.4
1204	102170130	LOC102170130	8.78 ± 0.25	12.08 ± 0.19	6.27 ± 0.25	0.0128	0.0256	0.46		0.0963799	0.19276	-0.95
1205	102170131	TCEANC	6.29 ± 0.15	5.4 ± 0.06	7.03 ± 0.33	0.513	1	-0.22		0.609886	1	0.38
1206	102170135	PIK3R2	33.47 ± 1.74	16.57 ± 1.13	33.84 ± 2.26	0.00038	0.00076	-1.01	DN	2.15987e-05	4.32e-05	1.03	UP
1207	102170139	HINT1	233.32 ± 18.2	209.55 ± 3.49	297.32 ± 9.28	0.462	0.924	-0.16		5.98334e-10	1.196e-09	0.5
1208	102170141	ECSCR	2.11 ± 0.26	2.41 ± 0.37	1.79 ± 0.13	0.722	1	0.19		0.732925	1	-0.43
1209	102170142	LOC102170142	2.16 ± 0.22	2.17 ± 0.14	2.52 ± 0.13	0.991	1	0		0.616758	1	0.22
1210	102170144	LOC102170144	1.3 ± 0.19	0.95 ± 0.09	1.05 ± 0.08	0.584	1	-0.45		1	1	0.15
1211	102170145	RBM27	4.65 ± 0.06	5.48 ± 0.12	4.53 ± 0.05	0.245	0.49	0.24		0.914837	1	-0.28
1212	102170148	PLN	10.16 ± 3.27	17.01 ± 2.63	2.23 ± 0.5	0.0186	0.0372	0.74		3.26027e-06	6.52e-06	-2.93	DN
1213	102170149	STX7	21.53 ± 0.41	21.1 ± 0.48	17.44 ± 0.5	0.91	1	-0.03		0.638309	1	-0.27
1214	102170151	FBXL22	1.23 ± 0.33	2.24 ± 0.25	0.04 ± 0.01	0.0639	0.1278	0.87		0.0289031	0.0578062	-5.99
1215	102170154	COG6	7.33 ± 0.2	7.37 ± 0.02	7.29 ± 0.16	0.982	1	0.01		1	1	-0.01
1216	102170156	LATS2	6.52 ± 0.08	4.84 ± 0.11	5.01 ± 0.21	0.0391	0.0782	-0.43		1	1	0.05
1217	102170158	CRNKL1	13.77 ± 0.13	11.91 ± 0.2	13.7 ± 0.57	0.303	0.606	-0.21		0.853714	1	0.2
1218	102170166	SPCS2	79.06 ± 1.65	90.73 ± 1.96	84.06 ± 1.89	0.324	0.648	0.2		0.70863	1	-0.11
1219	102170167	MRPL16	107.44 ± 7.14	122.52 ± 0.79	150.11 ± 3.61	0.344	0.688	0.19		0.0143913	0.0287827	0.29
1220	102170169	SF3B3	22.47 ± 0.38	25.46 ± 0.58	24.72 ± 0.59	0.376	0.752	0.18		0.890824	1	-0.04
1221	102170171	RPL13A	5520.52 ± 420.19	5343.59 ± 37.5	8427.77 ± 283.96	0.918	1	-0.05		1.58737e-192	3.18e-192	0.66
1222	102170174	MYO18A	22.06 ± 1.25	17.61 ± 0.92	21.56 ± 0.86	0.0926	0.1852	-0.32		0.578325	1	0.29
1223	102170176	METTL2A	8.39 ± 0.25	9.55 ± 0.16	7.8 ± 0.11	0.465	0.93	0.19		0.784206	1	-0.29
1224	102170179	EVPL	58.02 ± 0.76	31.18 ± 1.4	42.72 ± 1.44	0.00038	0.00076	-0.9		0.0655145	0.131029	0.45
1225	102170182	TBL1XR1	15.27 ± 0.39	15.28 ± 0.5	17.1 ± 0.65	0.997	1	0		0.876278	1	0.16
1226	102170183	LYSMD4	2.11 ± 0.09	2.55 ± 0.01	1.45 ± 0.07	0.39	0.78	0.27		0.0745604	0.149121	-0.81
1227	102170185	UBE2E3	23.64 ± 0.44	18.74 ± 0.34	28.94 ± 0.47	0.105	0.21	-0.34		0.0623954	0.124791	0.63
1228	102170186	PHOSPHO2	13.69 ± 0.39	8.98 ± 0.23	8.01 ± 0.41	0.0117	0.0234	-0.61		0.816131	1	-0.16
1229	102170187	OSBPL10	0.85 ± 0.03	1.05 ± 0.04	1.41 ± 0.02	0.461	0.922	0.31		1	1	0.42
1230	102170188	DARS	32.39 ± 1.52	32.99 ± 0.29	26.29 ± 0.45	0.914	1	0.03		0.302344	0.604689	-0.33
1231	102170189	GTF3C3	4.5 ± 0.14	3.52 ± 0.03	5.2 ± 0.02	0.155	0.31	-0.36		0.697857	1	0.57
1232	102170194	NEDD4L	6.05 ± 0.07	5.6 ± 0.16	8.35 ± 0.43	0.644	1	-0.11		0.551378	1	0.58
1233	102170195	FAF1	42.38 ± 0.76	37.26 ± 0.84	52.6 ± 2.47	0.359	0.718	-0.19		0.0280938	0.0561875	0.5
1234	102170196	FBXL19	14.19 ± 0.64	15.98 ± 0.36	14.09 ± 0.61	0.416	0.832	0.17		0.734991	1	-0.18
1235	102170198	FIGNL1	1.69 ± 0.01	3.36 ± 0.09	2.04 ± 0.04	0.00254	0.00508	0.99		0.422172	0.844343	-0.72
1236	102170199	CREB3L2	1.48 ± 0.08	1.45 ± 0.03	1.23 ± 0.05	0.916	1	-0.04		1	1	-0.24
1237	102170200	IMPDH1	20.83 ± 0.67	32.63 ± 1.38	28.09 ± 0.77	0.00038	0.00076	0.65		0.57621	1	-0.22
1238	102170201	SHH	3.14 ± 0.12	12.21 ± 0.88	6.14 ± 0.11	0.00038	0.00076	1.96	UP	0.0630803	0.126161	-0.99
1239	102170205	SAC3D1	4.81 ± 0.31	6.25 ± 0.04	6.02 ± 0.16	0.381	0.762	0.38		1	1	-0.05
1240	102170209	SLC9A6	3.03 ± 0.04	3.91 ± 0.1	2.69 ± 0.12	0.116	0.232	0.37		0.498305	0.99661	-0.54
1241	102170212	AP1AR	3.89 ± 0.07	4.91 ± 0.18	4.05 ± 0.12	0.159	0.318	0.34		0.816131	1	-0.28
1242	102170213	GRIPAP1	7.56 ± 0.35	8.54 ± 0.35	6.53 ± 0.16	0.427	0.854	0.18		0.747862	1	-0.39
1243	102170214	LOC102170214	3.63 ± 0.36	10.87 ± 0.28	9.98 ± 0.64	0.00101	0.00202	1.58	UP	0.862582	1	-0.12
1244	102170221	PET100	129.6 ± 16.52	138.54 ± 6.88	173.82 ± 2.07	0.693	1	0.1		0.00274854	0.00549708	0.33
1245	102170223	PTPRS	3.44 ± 0.3	2.12 ± 0.01	1.85 ± 0.03	0.00321	0.00642	-0.69		1	1	-0.19
1246	102170231	HACD4	1.94 ± 0.06	1.23 ± 0.23	1.97 ± 0.23	0.295	0.59	-0.66		0.298903	0.597805	0.68
1247	102170233	SLC31A2	55.38 ± 0.86	16.85 ± 0.49	30.5 ± 0.71	0.00038	0.00076	-1.72	DN	0.00654568	0.0130914	0.86
1248	102170239	LOC102170239	8.75 ± 0.86	13.18 ± 0.5	20.31 ± 0.82	0.0909	0.1818	0.59		0.064573	0.129146	0.62
1249	102170240	TMOD3	24.43 ± 0.45	25.44 ± 0.59	27.19 ± 0.57	0.817	1	0.06		0.839264	1	0.1
1250	102170241	HEATR5B	3.24 ± 0.1	3.21 ± 0.04	3.4 ± 0.08	0.958	1	-0.01		1	1	0.08
1251	102170242	GGCX	17.13 ± 0.15	12.01 ± 0.29	14.23 ± 0.26	0.00387	0.00774	-0.51		0.741571	1	0.25
1252	102170245	ARGLU1	16.82 ± 2.51	23.65 ± 0.57	12.31 ± 0.39	0.0171	0.0342	0.49		0.00624376	0.0124875	-0.94
1253	102170247	GSS	18.03 ± 0.98	17.26 ± 0.38	25.84 ± 0.96	0.795	1	-0.06		0.0786444	0.157289	0.58
1254	102170249	GPAA1	68.28 ± 2.46	69.01 ± 1.36	96.04 ± 1.38	0.952	1	0.02		0.00181217	0.00362434	0.48
1255	102170251	IL18BP	1.89 ± 0.05	2.43 ± 0.12	1.75 ± 0.15	0.319	0.638	0.37		1	1	-0.48
1256	102170253	CNST	5.13 ± 0.15	3.7 ± 0.11	5.84 ± 0.27	0.0192	0.0384	-0.47		0.610601	1	0.66
1257	102170255	LOC102170255	3.84 ± 0.23	3 ± 0.22	5.19 ± 0.42	0.111	0.222	-0.36		0.3723	0.7446	0.79
1258	102170256	LAMC1	7.82 ± 0.96	5.16 ± 0.23	4.94 ± 0.17	0.00156	0.00312	-0.6		1	1	-0.06
1259	102170258	LOC102170258	7.28 ± 0.11	6.55 ± 0.04	7.7 ± 0.36	0.601	1	-0.15		0.864413	1	0.23
1260	102170260	SLC35E4	4.03 ± 0.19	5.61 ± 0.26	5.25 ± 0.14	0.146	0.292	0.48		0.952407	1	-0.09
1261	102170261	SLC22A31	2.25 ± 0.14	3.23 ± 0.13	5.57 ± 0.23	0.171	0.342	0.52		0.386101	0.772203	0.79
1262	102170262	CKM	4.36 ± 0.25	3.04 ± 0.03	5.48 ± 0.06	0.108	0.216	-0.52		0.386101	0.772203	0.85
1263	102170263	FKRP	3.39 ± 0.12	2.6 ± 0.11	2.48 ± 0.14	0.314	0.628	-0.38		1	1	-0.07
1264	102170265	VAMP2	12.66 ± 2.01	8.41 ± 0.49	6.78 ± 0.2	0.00706	0.01412	-0.59		0.760291	1	-0.31
1265	102170266	LOC102170266	237.48 ± 25.86	384.29 ± 11.14	350.54 ± 9.57	0.00038	0.00076	0.69		0.100752	0.201504	-0.13
1266	102170270	CSK	19.3 ± 0.4	24.43 ± 0.74	25.15 ± 0.66	0.0761	0.1522	0.34		1	1	0.04
1267	102170271	RYK	15.29 ± 0.39	16.13 ± 0.22	15.61 ± 0.27	0.745	1	0.08		0.91983	1	-0.05
1268	102170272	MBIP	4.07 ± 0.18	4.34 ± 0.14	2.9 ± 0.31	0.8	1	0.09		0.498305	0.99661	-0.58
1269	102170273	ICOSLG	24.35 ± 1.45	14.08 ± 0.34	24.45 ± 0.92	0.00038	0.00076	-0.79		0.0263443	0.0526885	0.8
1270	102170275	NKTR	4.97 ± 0.47	4.19 ± 0.07	3.28 ± 0.06	0.335	0.67	-0.24		0.498305	0.99661	-0.35
1271	102170277	RNF25	6.38 ± 0.33	8.73 ± 0.24	6.68 ± 0.12	0.0697	0.1394	0.45		0.761932	1	-0.39
1272	102170282	LOC102170282	260.23 ± 19.05	346.37 ± 11.23	452.58 ± 26.25	0.0402	0.0804	0.41		5.32619e-07	1.066e-06	0.39
1273	102170283	VARS2	4.17 ± 0.24	4.51 ± 0.13	5.12 ± 0.14	0.668	1	0.11		0.949553	1	0.18
1274	102170287	CPPED1	4.95 ± 0.14	3.59 ± 0.04	5.27 ± 0.14	0.0538	0.1076	-0.46		0.761932	1	0.55
1275	102170288	COG7	7.14 ± 0.31	6.08 ± 0.12	6.57 ± 0.27	0.318	0.636	-0.23		0.890824	1	0.11
1276	102170291	NUDT1	5.43 ± 0.64	12.35 ± 0.35	9.09 ± 0.49	0.00129	0.00258	1.19	UP	0.471081	0.942162	-0.44
1277	102170292	RPA3	18.45 ± 0.71	25.3 ± 0.94	31.43 ± 0.27	0.0699	0.1398	0.46		0.392366	0.784732	0.31
1278	102170293	SFXN2	1.06 ± 0.11	2.1 ± 0.04	1.89 ± 0.09	0.0406	0.0812	0.98		1	1	-0.15
1279	102170297	MCPH1	2.41 ± 0.06	2.18 ± 0.01	1.63 ± 0.07	0.726	1	-0.14		1	1	-0.42
1280	102170299	CEP290	1.62 ± 0.05	1.46 ± 0.03	0.84 ± 0.11	0.692	1	-0.15		1	1	-0.79
1281	102170301	BARX2	31.36 ± 2.21	15.84 ± 0.53	17.24 ± 0.45	0.00038	0.00076	-0.99		0.876278	1	0.12
1282	102170303	TULP3	3.62 ± 0.21	2.39 ± 0.02	2.42 ± 0.05	0.0246	0.0492	-0.6		1	1	0.02
1283	102170306	PI4K2B	12.94 ± 0.24	5.79 ± 0.14	10.1 ± 0.21	0.00038	0.00076	-1.16	DN	0.220927	0.441854	0.8
1284	102170310	LOC102170310	0.81 ± 0.06	1.33 ± 0.19	1.33 ± 0.12	0.209	0.418	0.71		0.808253	1	0
1285	102170314	APOE	21.06 ± 1.73	13.95 ± 1.5	28.53 ± 6.34	0.00725	0.0145	-0.59		0.00162311	0.00324623	1.03	UP
1286	102170315	TIMM17A	83.71 ± 5.31	116.88 ± 1.46	119.58 ± 1.85	0.00839	0.01678	0.48		0.942863	1	0.03
1287	102170316	BTBD2	43.85 ± 0.81	28.01 ± 0.2	52.33 ± 1.43	0.00038	0.00076	-0.65		3.567e-05	7.14e-05	0.9
1288	102170318	C8H9orf85	18.16 ± 1.22	12.91 ± 0.45	16.36 ± 0.34	0.115	0.23	-0.49		0.471239	0.942479	0.34
1289	102170319	FAM160B2	7.85 ± 0.11	7.21 ± 0.15	6.56 ± 0.21	0.596	1	-0.12		0.992082	1	-0.14
1290	102170320	RSPH3	1.22 ± 0.05	1.48 ± 0.08	0.78 ± 0.05	0.535	1	0.28		0.6434	1	-0.92
1291	102170322	DAAM1	20.43 ± 0.22	21.08 ± 0.54	15.46 ± 0.52	0.849	1	0.04		0.307547	0.615095	-0.45
1292	102170323	ACYP1	8.96 ± 0.73	14.24 ± 0.85	14.33 ± 0.46	0.0357	0.0714	0.67		0.986068	1	0.01
1293	102170324	ANAPC1	4.13 ± 0.04	3.59 ± 0.15	4.12 ± 0.18	0.372	0.744	-0.2		0.986068	1	0.2
1294	102170325	AUP1	99 ± 2.28	105.8 ± 2.12	122.24 ± 2.02	0.675	1	0.1		0.176132	0.352265	0.21
1295	102170327	ITSN2	6.91 ± 0.21	4.64 ± 0.19	4.73 ± 0.09	0.0023	0.0046	-0.58		0.949553	1	0.03
1296	102170328	PTGS1	9.46 ± 1.71	6.4 ± 0.66	8.31 ± 0.3	0.0146	0.0292	-0.56		0.651252	1	0.38
1297	102170329	ST6GALNAC4	2.66 ± 0.12	2.86 ± 0.25	2.74 ± 0.13	0.826	1	0.1		1	1	-0.06
1298	102170331	TGDS	4.71 ± 0.14	4.89 ± 0.1	8.88 ± 0.4	0.863	1	0.05		0.244227	0.488454	0.86
1299	102170332	LOC102170332	3.3 ± 0.11	2.06 ± 0.08	2.67 ± 0.02	0.00254	0.00508	-0.68		0.422171	0.844342	0.37
1300	102170336	SLC25A32	2.73 ± 0.04	2.38 ± 0.02	3.09 ± 0.03	0.45	0.9	-0.2		0.422171	0.844342	0.38
1301	102170338	C14H8orf37	1.81 ± 0.08	1.51 ± 0.1	1.35 ± 0.05	0.451	0.902	-0.26		0.6434	1	-0.17
1302	102170340	ALG9	8.33 ± 0.25	7.59 ± 0.54	8.78 ± 0.21	0.629	1	-0.13		0.816131	1	0.21
1303	102170342	CKAP5	5.35 ± 0.04	5.54 ± 0.17	5.95 ± 0.3	0.837	1	0.05		0.957754	1	0.1
1304	102170343	LOC102170343	203.64 ± 21.27	176.16 ± 4.95	141.81 ± 2.92	0.338	0.676	-0.21		0.00171447	0.00342894	-0.31
1305	102170347	FHDC1	5.5 ± 0.31	7.27 ± 0.33	7.56 ± 0.25	0.151	0.302	0.4		0.966937	1	0.06
1306	102170348	RHOF	2.48 ± 0.47	1.62 ± 0.11	1.29 ± 0.11	0.0383	0.0766	-0.61		0.298903	0.597806	-0.33
1307	102170349	RNF185	25.3 ± 0.38	24.51 ± 0.54	27.5 ± 0.65	0.845	1	-0.05		0.725324	1	0.17
1308	102170352	USF2	56.61 ± 2.22	41.08 ± 1.33	77.71 ± 4.68	0.00967	0.01934	-0.46		2.23267e-06	4.46e-06	0.92
1309	102170353	ZNF329	9.35 ± 0.33	10.51 ± 0.25	8.22 ± 0.12	0.45	0.9	0.17		0.588431	1	-0.35
1310	102170354	TAOK1	2.88 ± 0.17	2.7 ± 0.08	2.97 ± 0.18	0.686	1	-0.09		0.881875	1	0.14
1311	102170355	CBX1	8.38 ± 0.24	16.83 ± 0.5	12.02 ± 0.23	0.00038	0.00076	1.01	UP	0.286241	0.572482	-0.49
1312	102170356	GRB2	19.73 ± 0.37	22.22 ± 0.43	20.98 ± 0.45	0.405	0.81	0.17		0.938725	1	-0.08
1313	102170357	SLC5A3	5.32 ± 0.41	6.31 ± 0.18	3.24 ± 0.33	0.203	0.406	0.25		0.289687	0.579374	-0.96
1314	102170360	LOC102170360	72.51 ± 5.6	77.75 ± 1.16	66.23 ± 1.31	0.646	1	0.1		0.17694	0.35388	-0.23
1315	102170361	IQCG	4.19 ± 0.52	2.89 ± 0.21	2.04 ± 0.02	0.309	0.618	-0.54		0.422172	0.844343	-0.5
1316	102170363	NUP155	6.42 ± 0.13	7.69 ± 0.26	6.24 ± 0.12	0.196	0.392	0.26		0.737093	1	-0.3
1317	102170365	BTBD1	9.66 ± 0.31	10.77 ± 0.22	9.01 ± 0.42	0.491	0.982	0.16		0.722977	1	-0.26
1318	102170366	DDX24	20.83 ± 0.67	22.43 ± 0.93	17.53 ± 0.8	0.621	1	0.11		0.407958	0.815917	-0.36
1319	102170367	ARL6IP6	7.38 ± 0.4	9.53 ± 0.37	8.91 ± 0.36	0.0908	0.1816	0.37		1	1	-0.1
1320	102170369	RPL7L1	24.87 ± 0.97	28.02 ± 0.41	20.46 ± 0.6	0.401	0.802	0.17		0.199326	0.398653	-0.45
1321	102170371	YARS	9.62 ± 0.25	17.89 ± 0.6	12.6 ± 0.45	0.00038	0.00076	0.89		0.303241	0.606483	-0.51
1322	102170373	LOC102170373	55.43 ± 1.68	211.35 ± 5.12	70.07 ± 5.24	0.00038	0.00076	1.93	UP	1.09477e-44	2.18e-44	-1.59	DN
1323	102170375	AXIN1	10.6 ± 0.65	10.28 ± 0.47	13.69 ± 0.22	0.868	1	-0.04		0.511374	1	0.41
1324	102170376	NTHL1	24.1 ± 1.47	16.18 ± 1.03	19.75 ± 1.11	0.123	0.246	-0.58		0.502637	1	0.29
1325	102170377	CDC7	2.78 ± 0.09	2.95 ± 0.15	3.4 ± 0.12	0.797	1	0.09		0.885708	1	0.21
1326	102170379	CLDN4	195.66 ± 5.09	254.41 ± 9.81	435.48 ± 4.15	0.0601	0.1202	0.38		1.33769e-30	2.68e-30	0.78
1327	102170380	ELOVL1	46.34 ± 1.13	52.58 ± 1.2	43.25 ± 1.01	0.399	0.798	0.18		0.302114	0.604228	-0.28
1328	102170381	SMURF1	5.36 ± 0.02	5.68 ± 0.09	5.19 ± 0.13	0.731	1	0.08		0.838359	1	-0.13
1329	102170382	EFHD1	0.95 ± 0.18	1.52 ± 0.13	0.87 ± 0.1	0.166	0.332	0.68		0.6434	1	-0.8
1330	102170385	RINT1	4.69 ± 0.13	5.79 ± 0.06	4.09 ± 0.09	0.226	0.452	0.3		0.557499	1	-0.5
1331	102170388	CERS5	17.32 ± 0.54	15.13 ± 0.47	17.98 ± 0.5	0.379	0.758	-0.19		0.78318	1	0.25
1332	102170389	ZNF239	4.02 ± 0.19	2.62 ± 0.06	2.45 ± 0.03	0.0109	0.0218	-0.61		0.530118	1	-0.1
1333	102170392	CCT2	90.36 ± 5.87	123.32 ± 0.81	110.01 ± 1.46	0.0258	0.0516	0.45		0.394309	0.788618	-0.16
1334	102170394	MYL6	718.63 ± 51.93	975.62 ± 55.94	780.5 ± 9.18	0.0461	0.0922	0.44		8.18059e-08	1.636e-07	-0.32
1335	102170395	LOC102170395	2.99 ± 0.06	4.26 ± 0.04	2.94 ± 0.05	0.0708	0.1416	0.51		0.498305	0.99661	-0.54
1336	102170398	LOC102170398	44.36 ± 2.57	44.36 ± 0.85	33.86 ± 1.05	0.998	1	0		0.145667	0.291335	-0.39
1337	102170399	MLF2	117.64 ± 6.36	152.93 ± 3.15	192.35 ± 5.54	0.0456	0.0912	0.38		0.00521768	0.0104354	0.33
1338	102170403	RPL9	994.4 ± 62.28	948.97 ± 13.48	1186.03 ± 7.47	0.837	1	-0.07		4.19717e-14	8.4e-14	0.32
1339	102170406	C1QTNF7	4.82 ± 0.48	2.78 ± 0.28	4.07 ± 0.21	0.0135	0.027	-0.8		0.498305	0.996609	0.55
1340	102170408	MAPK9	5.79 ± 0.16	5.62 ± 0.02	6.56 ± 0.23	0.901	1	-0.04		0.960347	1	0.22
1341	102170409	MAST3	2.09 ± 0.08	1.72 ± 0.07	1.2 ± 0.07	0.312	0.624	-0.28		0.298903	0.597806	-0.52
1342	102170412	ARHGEF18	6.15 ± 0.15	7.54 ± 0.25	9.24 ± 0.37	0.135	0.27	0.29		0.781661	1	0.29
1343	102170414	LOC102170414	19.67 ± 0.32	11.62 ± 0.48	20.08 ± 1.33	0.117	0.234	-0.76		0.0400194	0.0800389	0.79
1344	102170415	ZFP62	2.28 ± 0.14	1.58 ± 0.06	1.24 ± 0.06	0.068	0.136	-0.53		0.391128	0.782257	-0.35
1345	102170422	NOL8	5.18 ± 0.18	5.49 ± 0.14	3.03 ± 0.08	0.729	1	0.09		0.340358	0.680717	-0.86
1346	102170426	POLK	2.83 ± 0.14	2.77 ± 0.03	2.85 ± 0.04	0.925	1	-0.03		1	1	0.04
1347	102170427	MAP2K5	7.53 ± 0.5	5.91 ± 0.07	8.33 ± 0.38	0.155	0.31	-0.35		0.609638	1	0.5
1348	102170429	HERC1	2.74 ± 0.09	1.81 ± 0.09	2.24 ± 0.06	0.00129	0.00258	-0.6		1	1	0.31
1349	102170432	MRPL19	28.49 ± 2.24	38.2 ± 0.73	33.27 ± 1.03	0.028	0.056	0.42		0.605904	1	-0.2
1350	102170433	CRAT	20.09 ± 0.84	41.61 ± 1.68	55.51 ± 1.47	0.00038	0.00076	1.05	UP	0.07931	0.15862	0.42
1351	102170434	SURF4	42.34 ± 0.43	63.3 ± 1.72	50.16 ± 0.27	0.00129	0.00258	0.58		0.133834	0.267667	-0.34
1352	102170435	LHFP	4.39 ± 0.81	2.16 ± 0.16	1.92 ± 0.14	0.00129	0.00258	-1.02	DN	1	1	-0.17
1353	102170437	XPO4	3.71 ± 0.21	4.35 ± 0.09	3.58 ± 0.09	0.275	0.55	0.23		0.986068	1	-0.28
1354	102170438	KIAA1217	18.04 ± 0.56	6.82 ± 0.37	13.56 ± 0.86	0.00038	0.00076	-1.4	DN	0.0343846	0.0687692	0.99
1355	102170439	RALGAPA2	3.75 ± 0.06	4.43 ± 0.23	5.16 ± 0.29	0.236	0.472	0.24		0.864598	1	0.22
1356	102170442	ASAP1	1.83 ± 0.12	0.96 ± 0.04	1.07 ± 0.07	0.00101	0.00202	-0.92		1	1	0.15
1357	102170445	TEAD1	3.79 ± 0.46	3.4 ± 0.15	2.84 ± 0.1	0.483	0.966	-0.16		1	1	-0.26
1358	102170450	COG4	16.58 ± 0.42	14.07 ± 0.51	17.24 ± 0.69	0.243	0.486	-0.24		0.678137	1	0.29
1359	102170451	CDH1	77.6 ± 1.9	71.52 ± 2.96	66.13 ± 0.98	0.625	1	-0.12		0.720974	1	-0.11
1360	102170452	CCDC97	13.21 ± 0.41	12.04 ± 0.46	15.38 ± 0.54	0.536	1	-0.13		0.519374	1	0.35
1361	102170453	RPS11	5481.69 ± 377.81	5212.26 ± 66.17	8157.55 ± 286.7	0.857	1	-0.07		1.97697e-234	3.96e-234	0.65
1362	102170457	NAA38	28.51 ± 2.32	19.22 ± 1.14	29.31 ± 1.19	0.00858	0.01716	-0.57		0.0519079	0.103816	0.61
1363	102170461	FAM195B	22.96 ± 0.92	20.76 ± 0.03	24.36 ± 0.61	0.506	1	-0.15		0.700723	1	0.23
1364	102170463	TIAM1	15.92 ± 0.37	13.7 ± 0.7	19.04 ± 0.66	0.279	0.558	-0.22		0.274779	0.549558	0.47
1365	102170467	LRRC28	16.65 ± 0.4	11.26 ± 0.19	16.6 ± 0.33	0.0117	0.0234	-0.56		0.220635	0.44127	0.56
1366	102170468	COMMD2	14.56 ± 0.97	15.4 ± 0.1	13.73 ± 0.42	0.791	1	0.08		0.890824	1	-0.17
1367	102170471	GPD1L	2.1 ± 0.22	2.5 ± 0.08	3.55 ± 0.08	0.404	0.808	0.25		0.676402	1	0.51
1368	102170473	PGAP1	1.41 ± 0.09	0.91 ± 0.02	1.22 ± 0.03	0.0299	0.0598	-0.64		1	1	0.42
1369	102170478	SETD1A	3.61 ± 0.07	3.48 ± 0.13	3.1 ± 0.14	0.855	1	-0.05		0.777477	1	-0.17
1370	102170479	LRRFIP1	33.52 ± 0.57	52.49 ± 0.5	37.68 ± 0.81	0.000707	0.001414	0.65		0.0269846	0.0539692	-0.48
1371	102170480	TOMM7	126.81 ± 9.14	126.48 ± 3.21	104.1 ± 3.99	0.989	1	0		0.0915953	0.183191	-0.28
1372	102170482	FKBP9	9.09 ± 0.57	6.06 ± 0.15	6.17 ± 0.19	0.0131	0.0262	-0.58		1	1	0.02
1373	102170484	AKR1D1	236.09 ± 12.61	275.03 ± 2.01	208.1 ± 12.78	0.374	0.748	0.22		1.85088e-05	3.7e-05	-0.4
1374	102170485	FLNC	9.58 ± 2.89	11.6 ± 1.5	8.14 ± 0.49	0.27	0.54	0.28		0.443455	0.88691	-0.51
1375	102170487	NOM1	8.65 ± 0.2	10.2 ± 0.4	8.49 ± 0.23	0.293	0.586	0.24		0.702745	1	-0.26
1376	102170489	TARBP2	11.16 ± 0.63	10.33 ± 0.1	11.32 ± 0.27	0.67	1	-0.11		0.864413	1	0.13
1377	102170490	METTL21B	1.52 ± 0.07	1.35 ± 0.04	1.55 ± 0.07	0.679	1	-0.18		0.505043	1	0.2
1378	102170496	STAG2	11.07 ± 0.33	7.47 ± 0.16	8.19 ± 0.3	0.0023	0.0046	-0.57		0.939669	1	0.13
1379	102170497	VMA21	21.11 ± 0.29	31.54 ± 1.5	25.58 ± 1.17	0.00129	0.00258	0.58		0.562646	1	-0.3
1380	102170505	STXBP2	31.57 ± 2.07	29.09 ± 1.07	42.74 ± 2.02	0.59	1	-0.12		0.0424682	0.0849364	0.56
1381	102170507	KDM4B	10.36 ± 0.28	10.29 ± 0.29	10.96 ± 0.21	0.971	1	-0.01		0.949553	1	0.09
1382	102170510	TPGS1	18.95 ± 0.53	9.88 ± 0.8	15.51 ± 0.64	0.00038	0.00076	-0.94		0.221304	0.442609	0.65
1383	102170514	PLAA	6.79 ± 0.09	9.17 ± 0.17	6.07 ± 0.16	0.0401	0.0802	0.43		0.432227	0.864455	-0.6
1384	102170515	MLLT3	6.6 ± 0.25	2.72 ± 0.09	5.48 ± 0.11	0.00038	0.00076	-1.28	DN	0.000412122	0.000824244	1.01	UP
1385	102170516	SLC31A1	33.71 ± 1.68	42.45 ± 1.05	39.66 ± 0.4	0.086	0.172	0.33		0.752429	1	-0.1
1386	102170517	NIPSNAP3A	10.83 ± 0.34	10.23 ± 0.35	10.57 ± 0.48	0.786	1	-0.08		0.922648	1	0.05
1387	102170521	CLN6	7.42 ± 0.26	6.83 ± 0.21	7.92 ± 0.08	0.651	1	-0.12		0.838359	1	0.21
1388	102170525	USP34	6.02 ± 0.29	5.68 ± 0.12	5.86 ± 0.08	0.719	1	-0.08		1	1	0.04
1389	102170526	TRMT61B	1.99 ± 0.19	2.82 ± 0.07	2.44 ± 0.16	0.171	0.342	0.51		0.530118	1	-0.21
1390	102170532	TTPAL	2.24 ± 0.11	2.38 ± 0.15	2.94 ± 0.2	0.797	1	0.09		0.530118	1	0.31
1391	102170536	ST5	1.82 ± 0.39	1.54 ± 0.17	1.01 ± 0.05	0.46	0.92	-0.24		0.391128	0.782257	-0.61
1392	102170540	LAMC2	11.38 ± 0.52	9.59 ± 0.4	8.36 ± 0.4	0.207	0.414	-0.25		0.853714	1	-0.2
1393	102170542	CHFR	7.86 ± 0.23	7.62 ± 0.15	7.06 ± 0.21	0.867	1	-0.04		0.935904	1	-0.11
1394	102170543	ALDH2	227.44 ± 9.06	288.35 ± 7.89	359.67 ± 9.71	0.121	0.242	0.34		3.99266e-05	7.98e-05	0.32
1395	102170547	BORCS6	5.04 ± 0.21	5.47 ± 0.13	6.76 ± 0.17	0.673	1	0.12		0.816131	1	0.31
1396	102170548	CDC27	6.58 ± 0.34	7.16 ± 0.03	6.7 ± 0.12	0.591	1	0.12		1	1	-0.1
1397	102170549	AMZ2	33.95 ± 1.04	22.94 ± 0.51	40.27 ± 1.44	0.00277	0.00554	-0.57		0.00165339	0.00330678	0.81
1398	102170550	MAATS1	1.31 ± 0.07	2.29 ± 0.14	2.4 ± 0.07	0.00038	0.00076	0.81		1	1	0.07
1399	102170551	TRAPPC13	7.76 ± 0.52	7.59 ± 0.08	7.18 ± 0.23	0.915	1	-0.03		0.864413	1	-0.08
1400	102170555	SLCO2A1	20.44 ± 0.41	22.81 ± 0.77	32.66 ± 0.78	0.44	0.88	0.16		0.152172	0.304345	0.52
1401	102170559	SHQ1	4.16 ± 0.17	4.76 ± 0.05	3.07 ± 0.07	0.506	1	0.2		0.487687	0.975374	-0.63
1402	102170562	BAK1	19.81 ± 1.12	31.32 ± 1.01	29.14 ± 0.86	0.00038	0.00076	0.66		0.867765	1	-0.1
1403	102170563	UBXN11	1.41 ± 0.05	1.97 ± 0.13	1.22 ± 0.04	0.255	0.51	0.48		0.298903	0.597806	-0.69
1404	102170565	DAAM2	6.2 ± 1.62	6.87 ± 0.88	2.38 ± 0.08	0.558	1	0.15		1.8e-05	3.6e-05	-1.53	DN
1405	102170566	MRTO4	31.69 ± 2.04	44.7 ± 1.41	36.7 ± 0.87	0.00839	0.01678	0.5		0.430687	0.861374	-0.28
1406	102170568	DEDD	21.78 ± 0.26	17.89 ± 0.23	23.3 ± 1.19	0.155	0.31	-0.28		0.359345	0.718691	0.38
1407	102170570	ECI2	5.62 ± 0.62	6.19 ± 0.41	4.57 ± 0.14	0.679	1	0.14		0.621673	1	-0.44
1408	102170573	GGA2	8.65 ± 0.36	7.56 ± 0.07	7.06 ± 0.12	0.383	0.766	-0.2		0.89852	1	-0.1
1409	102170575	AKIRIN1	6.6 ± 0.22	11.35 ± 0.55	8.99 ± 0.49	0.00038	0.00076	0.78		0.652267	1	-0.34
1410	102170576	FTSJ2	12.33 ± 0.33	15.28 ± 0.17	12.79 ± 0.01	0.165	0.33	0.31		0.788223	1	-0.26
1411	102170577	GLCCI1	1.32 ± 0.15	1.16 ± 0.07	1.11 ± 0.11	0.645	1	-0.18		1	1	-0.07
1412	102170579	LOC102170579	0.81 ± 0.07	1.6 ± 0.04	1.05 ± 0.06	0.00101	0.00202	0.98		0.298903	0.597806	-0.61
1413	102170580	AGPAT5	14.53 ± 0.37	12.28 ± 0.3	11.36 ± 0.66	0.45	0.9	-0.24		0.874663	1	-0.11
1414	102170581	ZNF800	2.44 ± 0.15	2.74 ± 0.06	2.53 ± 0.1	0.57	1	0.16		0.881875	1	-0.11
1415	102170582	ZDHHC2	1.38 ± 0.3	1.18 ± 0.17	0.73 ± 0.05	0.593	1	-0.23		1	1	-0.7
1416	102170583	C5H12orf29	5.99 ± 0.1	9.61 ± 0.12	6.06 ± 0.1	0.00687	0.01374	0.68		0.289598	0.579196	-0.67
1417	102170587	CFL1	420.37 ± 19.3	793.3 ± 13.97	800.25 ± 27.99	0.00038	0.00076	0.92		0.923143	1	0.01
1418	102170589	ASUN	5.58 ± 0.36	5.38 ± 0.02	5.2 ± 0.11	0.853	1	-0.05		1	1	-0.05
1419	102170592	METTL14	5.87 ± 0.22	7.6 ± 0.16	5.59 ± 0.19	0.0908	0.1816	0.37		0.691552	1	-0.44
1420	102170593	FOXO4	7.82 ± 0.26	6.65 ± 0.32	6.97 ± 0.08	0.285	0.57	-0.23		0.890824	1	0.07
1421	102170594	UXT	38.05 ± 2	52.71 ± 1.84	68.74 ± 0.87	0.0188	0.0376	0.47		0.0340957	0.0681914	0.38
1422	102170601	RNPEP	14.53 ± 0.42	14.95 ± 0.71	16.08 ± 0.68	0.881	1	0.04		0.942272	1	0.1
1423	102170604	LOC102170604	5.45 ± 0.59	2.77 ± 0.38	1.97 ± 0.19	0.682	1	-0.98		0.513173	1	-0.49
1424	102170608	TMEM87B	4.66 ± 0.35	4.18 ± 0.14	3.21 ± 0.12	0.502	1	-0.16		0.498305	0.99661	-0.38
1425	102170609	RHOQ	2.17 ± 0.32	2.38 ± 0.19	1.27 ± 0.06	0.808	1	0.14		0.0998827	0.199765	-0.91
1426	102170615	ATRN	4.81 ± 0.11	4.5 ± 0.07	3.88 ± 0.08	0.785	1	-0.1		0.89852	1	-0.21
1427	102170617	FZD6	11.88 ± 0.33	12.9 ± 0.36	12.82 ± 0.39	0.588	1	0.12		1	1	-0.01
1428	102170619	NDUFAF6	5.71 ± 0.02	5.28 ± 0.23	4.59 ± 0.22	0.698	1	-0.11		0.949553	1	-0.2
1429	102170622	ARFGAP2	27.95 ± 0.67	22.85 ± 0.61	26.21 ± 0.24	0.146	0.292	-0.29		0.768607	1	0.2
1430	102170623	CDK18	4.31 ± 0.06	2.77 ± 0.01	5.22 ± 0.47	0.0369	0.0738	-0.64		0.433503	0.867006	0.92
1431	102170624	CDC73	9.84 ± 0.44	8.89 ± 0.27	10.31 ± 0.12	0.501	1	-0.15		0.886735	1	0.21
1432	102170627	FANCA	1.57 ± 0.02	1.38 ± 0.05	1.4 ± 0.07	0.675	1	-0.19		1	1	0.02
1433	102170630	ZNF274	3.64 ± 0.07	2.52 ± 0.08	2.67 ± 0.06	0.0817	0.1634	-0.53		0.881875	1	0.08
1434	102170631	NFE2L1	41.46 ± 1.35	29.33 ± 0.89	29.81 ± 0.37	0.00629	0.01258	-0.5		0.985954	1	0.02
1435	102170632	ATP5O	531.48 ± 43.23	497.41 ± 5.89	640.09 ± 5.14	0.704	1	-0.1		1.77464e-11	3.54e-11	0.36
1436	102170634	GFM2	15.89 ± 0.76	15.83 ± 0.21	13.4 ± 0.41	0.989	1	-0.01		0.697857	1	-0.24
1437	102170635	NDUFS4	140.71 ± 13.09	149.48 ± 2.48	174.65 ± 5.04	0.7	1	0.09		0.0508305	0.101661	0.22
1438	102170636	SEMA5A	1.87 ± 0.09	1.34 ± 0.05	1.06 ± 0.04	0.0425	0.085	-0.48		1	1	-0.34
1439	102170638	CTSH	9.1 ± 0.75	2.4 ± 0.27	4.43 ± 0.19	0.00038	0.00076	-1.92	DN	0.230811	0.461622	0.88
1440	102170639	FBXO25	10.54 ± 0.2	6.19 ± 0.2	9.04 ± 0.18	0.00038	0.00076	-0.77		0.432227	0.864455	0.55
1441	102170640	LOC102170640	12.34 ± 0.96	26.52 ± 0.14	32.98 ± 0.58	0.00038	0.00076	1.1	UP	0.383333	0.766667	0.31
1442	102170642	FMNL2	11.4 ± 0.06	14.79 ± 0.52	14.93 ± 0.22	0.042	0.084	0.38		0.963982	1	0.01
1443	102170644	CCL20	2.28 ± 0.11	2.15 ± 0.36	0.11 ± 0.05	0.902	1	-0.08		0.0524	0.105	-4.31
1444	102170645	GNMT	20.75 ± 0.66	8.06 ± 0.24	16.6 ± 0.41	0.00552	0.01104	-1.36	DN	0.0716032	0.143206	1.04
1445	102170647	KIAA1522	20.38 ± 0.9	16.7 ± 0.66	26.17 ± 1.03	0.142	0.284	-0.29		0.0329623	0.0659247	0.65
1446	102170648	RNF5	37.15 ± 2.49	37.17 ± 1.13	45.75 ± 1.78	0.997	1	0		0.317066	0.634133	0.3
1447	102170649	IGSF8	3.75 ± 0.1	2.96 ± 0.1	2.77 ± 0.2	0.308	0.616	-0.34		0.881875	1	-0.09
1448	102170650	CKS1B	19.7 ± 1.21	36.83 ± 1.13	29.25 ± 1.27	0.00038	0.00076	0.9		0.330151	0.660301	-0.33
1449	102170653	SF3B4	30.06 ± 0.44	37.79 ± 1.45	41.67 ± 1.54	0.0883	0.1766	0.33		0.648463	1	0.14
1450	102170654	MRPL28	66.2 ± 6.65	71.36 ± 0.75	109.28 ± 4.12	0.626	1	0.11		1.52153e-06	3.04e-06	0.61
1451	102170656	FPGT	4.93 ± 0.02	5.06 ± 0.05	3.43 ± 0.22	0.902	1	0.04		0.559604	1	-0.56
1452	102170657	ABHD11	72.52 ± 7.3	119.73 ± 3.46	158.98 ± 5.17	0.00038	0.00076	0.72		0.00110672	0.00221343	0.41
1453	102170659	TRRAP	4.55 ± 0.09	4.16 ± 0.13	4.61 ± 0.14	0.541	1	-0.13		0.85757	1	0.15
1454	102170660	NGEF	30.94 ± 1.42	17.15 ± 0.98	24.95 ± 0.98	0.00038	0.00076	-0.85		0.127515	0.25503	0.54
1455	102170661	PANK1	9.32 ± 0.33	9.27 ± 0.41	13.39 ± 0.44	0.976	1	-0.01		0.374701	0.749402	0.53
1456	102170662	RRP12	6.2 ± 0.32	7.58 ± 0.28	6.48 ± 0.35	0.152	0.304	0.29		0.862878	1	-0.23
1457	102170663	LOC102170663	140.23 ± 1.86	115.57 ± 10.02	114.3 ± 12.03	0.353	0.706	-0.28		0.895061	1	-0.02
1458	102170667	DLG5	6.77 ± 0.19	5.44 ± 0.09	5.45 ± 0.23	0.106	0.212	-0.31		0.990335	1	0
1459	102170668	LOC102170668	87.42 ± 7.94	122.79 ± 1.12	119.6 ± 1.49	0.0123	0.0246	0.49		0.877529	1	-0.04
1460	102170669	COG2	17.01 ± 0.4	16.28 ± 0.23	16.49 ± 0.39	0.789	1	-0.06		0.986979	1	0.02
1461	102170670	TMEM117	32.08 ± 1.02	22.31 ± 0.59	32.24 ± 0.52	0.00387	0.00774	-0.52		0.098107	0.196214	0.53
1462	102170672	LOC102170672	2.45 ± 0.07	3.54 ± 0.13	3.24 ± 0.21	0.283	0.566	0.53		0.889578	1	-0.12
1463	102170678	FHL1	20.72 ± 3.39	47.58 ± 3.79	11.69 ± 1.06	0.00038	0.00076	1.2	UP	6.81924e-13	1.364e-12	-2.02	DN
1464	102170679	NAGA	11.79 ± 0.09	8.85 ± 0.11	11.45 ± 0.1	0.0346	0.0692	-0.41		0.687194	1	0.37
1465	102170681	TIGD2	2.96 ± 0.19	3.33 ± 0.07	3.21 ± 0.07	0.57	1	0.17		1	1	-0.06
1466	102170682	SCFD2	8.46 ± 0.29	6.14 ± 0.22	7.24 ± 0.29	0.0169	0.0338	-0.46		0.818674	1	0.24
1467	102170686	ARRDC2	1.76 ± 0.3	1.1 ± 0.08	0.6 ± 0	0.083	0.166	-0.68		1	1	-0.88
1468	102170687	PRDX2	224.41 ± 7.78	200.28 ± 3.58	244.99 ± 6.95	0.429	0.858	-0.16		0.00365531	0.00731062	0.29
1469	102170697	C8H9orf156	3.78 ± 0.16	2.6 ± 0.06	3.06 ± 0.06	0.0768	0.1536	-0.54		1	1	0.24
1470	102170701	USP3	5.95 ± 0.34	4.68 ± 0.08	5.07 ± 0.21	0.193	0.386	-0.35		1	1	0.12
1471	102170702	LOC102170702	35.7 ± 2.89	33.03 ± 0.69	53.15 ± 2.93	0.851	1	-0.11		0.000859157	0.00171831	0.69
1472	102170704	MAT2A	166.13 ± 23	1162.38 ± 35.55	149.72 ± 8	0.00038	0.00076	2.81	UP	0	0	-2.96	DN
1473	102170705	PPP2R4	59.63 ± 1.89	81.33 ± 1.79	107.97 ± 3.28	0.0146	0.0292	0.45		0.0085421	0.0170842	0.41
1474	102170706	DNLZ	72.95 ± 3.46	51.38 ± 0.43	66.84 ± 1.88	0.0374	0.0748	-0.51		0.0739535	0.147907	0.38
1475	102170707	N6AMT2	4.22 ± 0.08	5.1 ± 0.09	3.76 ± 0.25	0.476	0.952	0.27		0.761932	1	-0.44
1476	102170708	CRYL1	137.11 ± 10.08	93.52 ± 2.24	131.11 ± 3.94	0.00299	0.00598	-0.55		0.000489036	0.000978072	0.49
1477	102170709	KIZ	2.26 ± 0.02	2.38 ± 0.14	2.7 ± 0.19	0.863	1	0.07		0.530118	1	0.18
1478	102170711	SULF2	22.25 ± 0.3	8.28 ± 0.27	12.22 ± 0.46	0.00038	0.00076	-1.43	DN	0.381792	0.763584	0.56
1479	102170717	TFB2M	13.31 ± 0.66	27.66 ± 0.28	16.25 ± 0.18	0.00038	0.00076	1.06	UP	0.0112204	0.0224408	-0.77
1480	102170718	KIF1B	6.12 ± 0.3	10.01 ± 0.14	7.91 ± 0.19	0.00038	0.00076	0.71		0.702745	1	-0.34
1481	102170719	KLHL17	2.36 ± 0.35	2.87 ± 0.21	1.6 ± 0.11	0.392	0.784	0.28		0.422172	0.844343	-0.85
1482	102170720	AARS	33.39 ± 1.32	42.28 ± 1.17	43.56 ± 1.49	0.0711	0.1422	0.34		0.866653	1	0.04
1483	102170721	CHTF8	34.91 ± 1.55	32.36 ± 0.96	34.55 ± 0.43	0.633	1	-0.11		0.860787	1	0.09
1484	102170722	B9D2	4.04 ± 0.11	3.1 ± 0.21	4.48 ± 0.2	0.332	0.664	-0.38		0.6635	1	0.53
1485	102170724	FCGRT	35.98 ± 0.92	27.65 ± 0.56	43.29 ± 1.44	0.0479	0.0958	-0.38		0.00903174	0.0180635	0.65
1486	102170725	MYADM	6.76 ± 0.91	8.77 ± 0.73	3.51 ± 0.21	0.0913	0.1826	0.38		0.0225692	0.0451384	-1.32	DN
1487	102170728	DHX33	2.75 ± 0.15	3.62 ± 0.13	3.12 ± 0.16	0.16	0.32	0.4		0.498305	0.99661	-0.22
1488	102170731	TLK2	4.77 ± 0.03	3.52 ± 0.03	3.74 ± 0.04	0.0401	0.0802	-0.44		1	1	0.09
1489	102170734	ACOX1	17.46 ± 0.62	28.71 ± 0.89	26.99 ± 0.43	0.00038	0.00076	0.72		0.895515	1	-0.09
1490	102170737	HDDC3	63.05 ± 4.4	42.56 ± 1.66	53.69 ± 3.64	0.00181	0.00362	-0.57		0.0624856	0.124971	0.34
1491	102170739	CWC22	4.24 ± 0.16	4.94 ± 0.04	3 ± 0.18	0.378	0.756	0.22		0.487687	0.975374	-0.72
1492	102170740	CMTM8	1.39 ± 0.32	1.69 ± 0.11	1.29 ± 0.14	0.712	1	0.28		0.298903	0.597806	-0.39
1493	102170741	ANKRD44	1.07 ± 0.07	1.17 ± 0.05	1.16 ± 0.07	0.704	1	0.13		1	1	0
1494	102170742	TMEM115	31.09 ± 0.89	23.54 ± 0.51	33.18 ± 0.56	0.0286	0.0572	-0.4		0.104759	0.209518	0.5
1495	102170744	STK36	1.49 ± 0.03	1.06 ± 0.07	1.51 ± 0.03	0.117	0.234	-0.5		0.298903	0.597805	0.51
1496	102170745	ZCCHC17	14.24 ± 0.84	15.75 ± 0.77	12.98 ± 0.18	0.679	1	0.15		0.600668	1	-0.28
1497	102170746	LOC102170746	5.04 ± 0.73	3.53 ± 0.06	1.03 ± 0.02	0.818	1	-0.51		2.15e-05	4.3e-05	-1.77	DN
1498	102170747	LOC102170747	5.05 ± 0.19	3.95 ± 0.07	5.04 ± 0.39	0.306	0.612	-0.35		0.816131	1	0.35
1499	102170748	PSRC1	3.74 ± 0.17	5.04 ± 0.14	4.52 ± 0.05	0.152	0.304	0.43		0.988496	1	-0.16
1500	102170750	HSD3B7	5.68 ± 0.44	2.82 ± 0.16	3.49 ± 0.25	0.00156	0.00312	-1.01	DN	0.777476	1	0.31
1501	102170751	WBP1L	9.54 ± 0.12	9.83 ± 0.41	10.59 ± 0.24	0.869	1	0.04		0.890824	1	0.11
1502	102170752	KBTBD2	8.64 ± 0.42	8.82 ± 0.42	8.86 ± 0.43	0.912	1	0.03		0.972986	1	0.01
1503	102170753	VPS37A	6.37 ± 0.19	6.62 ± 0.28	7.19 ± 0.34	0.856	1	0.05		0.93228	1	0.12
1504	102170756	UBE3C	10.89 ± 0.06	10 ± 0.21	12.26 ± 0.18	0.578	1	-0.12		0.743283	1	0.29
1505	102170759	VPS51	33.48 ± 1.96	22.31 ± 0.66	36.33 ± 1.36	0.00101	0.00202	-0.59		0.00632939	0.0126588	0.7
1506	102170760	FADD	13.44 ± 0.71	11.17 ± 0.3	10.77 ± 0.36	0.358	0.716	-0.27		0.980628	1	-0.05
1507	102170763	DOCK11	4.79 ± 0.24	4.33 ± 0.23	6.58 ± 0.15	0.613	1	-0.15		0.411545	0.823091	0.6
1508	102170772	LOC102170772	6.07 ± 0.44	3.14 ± 0.38	5.65 ± 0.35	0.0199	0.0398	-0.95		0.340358	0.680717	0.85
1509	102170774	TICAM1	6.34 ± 0.23	5.64 ± 0.57	9.76 ± 0.37	0.658	1	-0.17		0.281824	0.563648	0.79
1510	102170779	CDC34	123.27 ± 7.87	135.21 ± 3.99	200.93 ± 8.42	0.533	1	0.13		4.97726e-08	9.96e-08	0.57
1511	102170781	WWC1	6.37 ± 0.56	7.84 ± 0.41	7.07 ± 0.25	0.145	0.29	0.3		0.89852	1	-0.15
1512	102170782	RASA1	8.59 ± 0.28	8.12 ± 0.05	7.52 ± 0.21	0.733	1	-0.08		0.937431	1	-0.11
1513	102170784	CAAP1	5.62 ± 0.14	6.27 ± 0.16	4.62 ± 0.1	0.55	1	0.16		0.806731	1	-0.44
1514	102170786	CDC26	22.02 ± 2.2	18.01 ± 0.39	13.51 ± 0.25	0.239	0.478	-0.29		0.423825	0.84765	-0.42
1515	102170790	FEM1B	22.17 ± 1.28	22.68 ± 0.44	28.39 ± 0.34	0.897	1	0.03		0.425443	0.850885	0.32
1516	102170791	KNSTRN	10.35 ± 0.78	19.86 ± 0.3	18.56 ± 1.11	0.00038	0.00076	0.94		0.867333	1	-0.1
1517	102170792	PIGH	3.54 ± 0.23	3.71 ± 0.13	1.99 ± 0.05	0.907	1	0.07		0.143946	0.287891	-0.9
1518	102170793	AHSA2	1.19 ± 0.03	1.3 ± 0.06	0.49 ± 0.05	0.931	1	0.13		0.574832	1	-1.42
1519	102170795	ELF1	14.13 ± 0.38	11.1 ± 0.22	13.12 ± 0.23	0.0653	0.1306	-0.35		0.76064	1	0.24
1520	102170797	SLC23A2	2.96 ± 0.4	2.94 ± 0.08	2.59 ± 0.02	0.974	1	-0.01		1	1	-0.19
1521	102170798	CSTF1	5.77 ± 0.14	5.47 ± 0.14	4.91 ± 0.08	0.775	1	-0.07		0.952407	1	-0.16
1522	102170803	EHF	50.61 ± 1.74	38.92 ± 0.96	50.13 ± 1.43	0.0539	0.1078	-0.38		0.118572	0.237144	0.37
1523	102170805	SLC43A3	9.99 ± 0.39	13.68 ± 0.32	11.94 ± 0.3	0.0209	0.0418	0.45		0.812256	1	-0.2
1524	102170806	PLEKHM2	23.89 ± 1.55	25.17 ± 0.63	36.4 ± 0.21	0.742	1	0.08		0.0546385	0.109277	0.53
1525	102170809	PGAM5	23.29 ± 0.79	39.57 ± 0.76	35.46 ± 0.28	0.00038	0.00076	0.76		0.713995	1	-0.16
1526	102170810	CCDC64	1.94 ± 0.03	2.02 ± 0.07	1.62 ± 0.07	0.916	1	0.06		1	1	-0.32
1527	102170811	SMTN	47.8 ± 6.97	71.87 ± 7.56	24.6 ± 1.2	0.00591	0.01182	0.59		3.79975e-16	7.6e-16	-1.55	DN
1528	102170812	POLR2C	16.2 ± 0.3	14.54 ± 0.41	14.82 ± 0.11	0.507	1	-0.16		1	1	0.03
1529	102170814	RNFT1	23.35 ± 0.5	17.82 ± 0.43	19.38 ± 0.88	0.0437	0.0874	-0.39		0.822409	1	0.12
1530	102170815	SLC25A19	5.92 ± 0.31	6.71 ± 0.15	7.27 ± 0.33	0.485	0.97	0.18		0.934803	1	0.12
1531	102170818	GNA13	10.04 ± 0.56	10.4 ± 0.47	10.66 ± 0.22	0.835	1	0.05		0.979593	1	0.04
1532	102170820	LRCH3	2.45 ± 0.14	1.42 ± 0.07	1.71 ± 0.06	0.0264	0.0528	-0.78		0.422997	0.845993	0.26
1533	102170823	LOC102170823	1.71 ± 0.05	3.2 ± 0.05	2.98 ± 0.09	0.00038	0.00076	0.9		1	1	-0.1
1534	102170825	NKX2-8	3.74 ± 0.52	1.7 ± 0.08	2.11 ± 0.2	0.252	0.504	-1.13		1	1	0.31
1535	102170828	EIF4E3	2.71 ± 0.46	1.92 ± 0.18	1.07 ± 0.05	0.169	0.338	-0.5		0.298903	0.597806	-0.85
1536	102170829	ARHGEF3	10.36 ± 0.24	6.42 ± 0.18	7.07 ± 0.18	0.00038	0.00076	-0.69		0.930362	1	0.14
1537	102170831	XPC	7.54 ± 0.42	5.64 ± 0.26	4.52 ± 0.16	0.0901	0.1802	-0.42		0.838359	1	-0.32
1538	102170832	LOC102170832	106.5 ± 11.32	149.39 ± 3.64	167.43 ± 9.9	0.00915	0.0183	0.49		0.563734	1	0.16
1539	102170833	CEP85	0.88 ± 0.05	1.17 ± 0.02	1.13 ± 0.07	0.258	0.516	0.41		1	1	-0.05
1540	102170834	LOC102170834	4.18 ± 0.11	9.59 ± 0.24	22.48 ± 1.27	0.00038	0.00076	1.2	UP	0.000882991	0.00176598	1.23	UP
1541	102170835	EMC1	16.59 ± 0.25	17.51 ± 0.53	17.39 ± 0.53	0.729	1	0.08		1	1	-0.01
1542	102170836	PBX1	7.77 ± 0.38	5.81 ± 0.08	6.31 ± 0.03	0.0253	0.0506	-0.42		1	1	0.12
1543	102170838	LOC102170838	7.64 ± 0.67	20.72 ± 0.57	11.84 ± 0.4	0.00038	0.00076	1.44	UP	0.0485299	0.0970598	-0.81
1544	102170839	PRPF4B	8.09 ± 0.89	9.19 ± 0.07	6.82 ± 0.1	0.364	0.728	0.18		0.677034	1	-0.43
1545	102170842	NDUFAB1	140.54 ± 6.65	141.97 ± 2.33	176.42 ± 3.72	0.954	1	0.01		0.00534597	0.0106919	0.31
1546	102170845	RHBDL2	31.32 ± 2.52	26.1 ± 0.59	28.67 ± 1.8	0.197	0.394	-0.26		0.722977	1	0.14
1547	102170846	MAD1L1	2.53 ± 0.2	2.84 ± 0.13	3.11 ± 0.1	0.702	1	0.17		1	1	0.13
1548	102170848	ICA1	5.02 ± 0.1	3.45 ± 0.15	3 ± 0.11	0.041	0.082	-0.54		0.676403	1	-0.2
1549	102170850	LOC102170850	1.1 ± 0.08	1.32 ± 0.06	1.84 ± 0.1	0.564	1	0.26		0.298903	0.597805	0.47
1550	102170854	ANKRD42	1.91 ± 0.12	1.8 ± 0.03	1.37 ± 0.07	0.846	1	-0.09		0.422997	0.845994	-0.39
1551	102170857	EFEMP2	3.12 ± 0.39	2.34 ± 0.24	2.43 ± 0.09	0.226	0.452	-0.41		1	1	0.05
1552	102170858	ITPR2	3.32 ± 0.08	2.4 ± 0.08	2.11 ± 0.03	0.0168	0.0336	-0.47		1	1	-0.19
1553	102170859	COPS7A	23.12 ± 0.52	19.81 ± 0.65	26.36 ± 0.81	0.271	0.542	-0.22		0.261205	0.52241	0.41
1554	102170870	CLASRP	4.27 ± 0.22	6.9 ± 0.26	3.74 ± 0.12	0.00365	0.0073	0.69		0.325977	0.651954	-0.88
1555	102170871	ELF3	54.48 ± 4.87	12.63 ± 0.26	28.03 ± 0.26	0.00038	0.00076	-2.11	DN	0.000272886	0.000545772	1.15	UP
1556	102170873	ENHO	7.34 ± 1.18	8.63 ± 0.8	6.94 ± 0.41	0.519	1	0.23		0.800537	1	-0.31
1557	102170876	LOC102170876	3.41 ± 0.18	2.06 ± 0.1	2.34 ± 0.02	0.047	0.094	-0.72		1	1	0.18
1558	102170877	LOC102170877	25.35 ± 2	16.59 ± 0.51	25.32 ± 2.61	0.0883	0.1766	-0.61		0.143086	0.286173	0.61
1559	102170879	GPATCH11	3.48 ± 0.06	4.14 ± 0.09	2.43 ± 0.07	0.315	0.63	0.25		0.143946	0.287891	-0.76
1560	102170880	CRIPT	25.76 ± 1.75	24.16 ± 0.37	26.58 ± 1.2	0.709	1	-0.09		0.853714	1	0.14
1561	102170882	NHLRC3	2.69 ± 0.15	1.91 ± 0.02	1.7 ± 0.06	0.139	0.278	-0.49		1	1	-0.17
1562	102170885	ARHGAP21	2.57 ± 0.09	1.98 ± 0.05	2.18 ± 0.13	0.0935	0.187	-0.38		1	1	0.14
1563	102170886	NANP	4.78 ± 0.14	8.37 ± 0.14	4.89 ± 0.27	0.0061	0.0122	0.81		0.274779	0.549558	-0.78
1564	102170888	EDEM2	16.27 ± 0.77	17.06 ± 0.35	19.34 ± 0.52	0.774	1	0.07		0.8176	1	0.18
1565	102170889	TMEM70	35.41 ± 0.49	43.02 ± 1.85	40.19 ± 1.25	0.184	0.368	0.28		0.893685	1	-0.1
1566	102170892	DPY19L4	7.02 ± 0.32	5.58 ± 0.2	5.66 ± 0.17	0.101	0.202	-0.33		1	1	0.02
1567	102170896	C15H11orf49	4.97 ± 0.22	4.26 ± 0.03	4.66 ± 0.12	0.782	1	-0.22		0.816131	1	0.13
1568	102170901	LOC102170901	4.22 ± 0.25	2.84 ± 0.1	3.65 ± 0.29	0.0543	0.1086	-0.57		0.676402	1	0.36
1569	102170902	ZNF276	8.58 ± 0.04	7.06 ± 0.25	5.78 ± 0.12	0.303	0.606	-0.28		0.818674	1	-0.29
1570	102170905	ERCC1	53.57 ± 2.76	52.27 ± 1	74.81 ± 3.64	0.9	1	-0.04		0.00723013	0.0144603	0.52
1571	102170906	ZNF8	2.23 ± 0.44	2.91 ± 0.24	3.22 ± 0.41	0.572	1	0.38		0.770665	1	0.15
1572	102170908	PEMT	5.6 ± 0.29	4.95 ± 0.15	6.37 ± 0.46	0.705	1	-0.18		0.838359	1	0.36
1573	102170909	MRPL12	105.59 ± 10.13	114.28 ± 3.92	172.67 ± 8.72	0.606	1	0.11		1.27607e-07	2.56e-07	0.6
1574	102170911	ARL6	2.26 ± 0.01	2.45 ± 0.02	2.03 ± 0.08	0.719	1	0.12		1	1	-0.27
1575	102170916	WWTR1	16 ± 0.96	14.06 ± 0.42	12.23 ± 0.24	0.355	0.71	-0.19		0.838359	1	-0.2
1576	102170918	LOC102170918	0.54 ± 0.09	2.05 ± 0.19	1.1 ± 0.21	0.359	0.718			0.298903	0.597806	-0.89
1577	102170919	WDSUB1	4.6 ± 0.19	3.87 ± 0.2	3.52 ± 0.19	0.373	0.746	-0.25		0.940888	1	-0.14
1578	102170921	WNT5A	5.09 ± 0.28	2.47 ± 0.2	4.11 ± 0.18	0.0138	0.0276	-1.04	DN	0.330752	0.661503	0.74
1579	102170922	MEA1	108.35 ± 9.27	88.62 ± 2.73	124.89 ± 3.68	0.546	1	-0.29		0.000230871	0.000461742	0.49
1580	102170925	KDM1B	10.43 ± 0.3	6.85 ± 0.15	8.83 ± 0.04	0.00129	0.00258	-0.61		0.677034	1	0.37
1581	102170926	SHC1	20.66 ± 0.32	20.74 ± 0.21	22.36 ± 0.24	0.983	1	0.01		0.85757	1	0.11
1582	102170929	RSBN1	2.13 ± 0.19	2.34 ± 0.07	2.16 ± 0.11	0.635	1	0.14		1	1	-0.11
1583	102170930	TMEM8A	7.8 ± 0.2	15.97 ± 0.53	17.17 ± 0.75	0.00038	0.00076	1.03	UP	0.83751	1	0.1
1584	102170931	PKD1	2.39 ± 0.29	2.07 ± 0.09	1.3 ± 0.05	0.369	0.738	-0.2		0.298903	0.597806	-0.67
1585	102170932	LOC102170932	3.53 ± 0.14	2.81 ± 0.14	3.43 ± 0.13	0.336	0.672	-0.33		0.885708	1	0.29
1586	102170933	LOC102170933	4.85 ± 0.18	4.42 ± 0.21	4.89 ± 0.16	0.763	1	-0.13		0.863008	1	0.14
1587	102170937	LOC102170937	5.15 ± 0.36	6.12 ± 0.44	3.71 ± 0.06	0.536	1	0.25		0.460938	0.921877	-0.72
1588	102170938	FGFR2	16.72 ± 0.47	6.43 ± 0.09	11.57 ± 0.27	0.00038	0.00076	-1.38	DN	0.0859241	0.171848	0.85
1589	102170940	TRIM24	3.14 ± 0.13	2.75 ± 0.04	2.87 ± 0.07	0.415	0.83	-0.19		1	1	0.06
1590	102170944	POLR3A	4.36 ± 0.13	5.79 ± 0.22	5.34 ± 0.18	0.0439	0.0878	0.41		0.878756	1	-0.12
1591	102170945	PCBP2	282.25 ± 1.63	194.46 ± 1.79	336.87 ± 12.42	0.00876	0.01752	-0.54		2.53317e-23	5.06e-23	0.79
1592	102170946	C29H11orf54	20.48 ± 0.81	23.93 ± 0.62	26.73 ± 1.07	0.269	0.538	0.22		0.816131	1	0.16
1593	102170947	PUS7L	3.54 ± 0.06	3.97 ± 0.11	2.72 ± 0.12	0.615	1	0.17		0.498305	0.99661	-0.54
1594	102170949	FRS2	3.18 ± 0.17	3.39 ± 0.13	3.93 ± 0.11	0.745	1	0.09		0.890824	1	0.21
1595	102170956	FAM13A	4.24 ± 0.43	5.01 ± 0.14	8.42 ± 0.39	0.25	0.5	0.24		0.309794	0.619588	0.75
1596	102170958	ANTXR2	9.24 ± 1.42	5.96 ± 0.62	2.82 ± 0.02	0.00129	0.00258	-0.63		0.000163621	0.000327242	-1.08	DN
1597	102170963	HOOK2	22.64 ± 0.88	17.07 ± 0.65	20.31 ± 0.68	0.0306	0.0612	-0.41		0.684803	1	0.25
1598	102170966	PEX11G	16.54 ± 1.51	14.92 ± 0.53	22.11 ± 0.57	0.611	1	-0.15		0.104692	0.209383	0.57
1599	102170974	LOC102170974	1.97 ± 0.26	2.02 ± 0.09	2.21 ± 0.11	0.955	1	0.04		1	1	0.13
1600	102170975	GOPC	5.48 ± 0.38	6 ± 0.18	5.83 ± 0.24	0.584	1	0.13		0.990335	1	-0.04
1601	102170977	TPPP2	1.4 ± 0.33	2.07 ± 0.18	1.11 ± 0.25	0.395	0.79	0.56		0.298903	0.597806	-0.9
1602	102170984	ELMOD3	8.71 ± 0.42	15.65 ± 0.33	7.2 ± 0.29	0.00038	0.00076	0.84		0.00903732	0.0180746	-1.12	DN
1603	102170985	PPP1CB	65.59 ± 1.37	74.02 ± 3.16	64.54 ± 3.44	0.433	0.866	0.17		0.566287	1	-0.2
1604	102170988	IFT88	1.55 ± 0.11	2.15 ± 0.06	1.33 ± 0.04	0.164	0.328	0.48		0.298903	0.597806	-0.69
1605	102170993	FDXACB1	1.51 ± 0.03	1.86 ± 0.04	1.1 ± 0.04	0.473	0.946	0.3		0.298903	0.597806	-0.76
1606	102170995	RNF121	11.55 ± 0.4	11.82 ± 0.61	12 ± 0.06	0.912	1	0.03		0.99763	1	0.02
1607	102170999	HAS3	8.06 ± 0.13	8.19 ± 0.27	5.98 ± 0.33	0.93	1	0.02		0.656892	1	-0.45
1608	102171001	EXOSC5	18.96 ± 1.62	16.21 ± 0.35	16.81 ± 0.2	0.345	0.69	-0.23		0.942863	1	0.05
1609	102171002	RCN3	5.36 ± 0.38	5.41 ± 0.32	6.11 ± 0.21	0.972	1	0.01		0.990335	1	0.18
1610	102171006	TP53I13	18.48 ± 1.35	20.34 ± 0.36	19.29 ± 0.7	0.61	1	0.14		0.935904	1	-0.08
1611	102171007	RPAIN	1.7 ± 0.17	2.94 ± 0.19	3.06 ± 0.17	0.523	1	0.79		1	1	0.06
1612	102171008	COPZ2	8.5 ± 0.93	5.9 ± 0.33	5.61 ± 0.17	0.132	0.264	-0.53		0.957754	1	-0.07
1613	102171010	FBF1	3.34 ± 0.07	2.82 ± 0.13	2.46 ± 0.06	0.308	0.616	-0.25		0.530118	1	-0.19
1614	102171012	MAN2A2	4.22 ± 0.15	3.81 ± 0.26	3.88 ± 0.06	0.554	1	-0.15		0.986068	1	0.03
1615	102171015	CMTM7	2.49 ± 0.03	2.58 ± 0.14	2.4 ± 0.13	0.926	1	0.05		0.631914	1	-0.11
1616	102171016	R3HDM1	1.88 ± 0.16	2.54 ± 0.1	2.26 ± 0.04	0.105	0.21	0.43		0.616759	1	-0.17
1617	102171017	LOC102171017	13.19 ± 0.11	10.67 ± 0.46	14.5 ± 0.08	0.244	0.488	-0.31		0.452126	0.904251	0.44
1618	102171020	PFDN2	38.2 ± 3.85	63.49 ± 3.23	58.68 ± 1.36	0.00038	0.00076	0.73		0.648463	1	-0.11
1619	102171022	ROCK1	8.61 ± 0.04	9.27 ± 0.13	6.66 ± 0.4	0.629	1	0.11		0.486851	0.973702	-0.48
1620	102171023	SARS	47.44 ± 2.75	55.83 ± 1.27	49.77 ± 1.36	0.237	0.474	0.23		0.555831	1	-0.17
1621	102171027	LSM5	19.31 ± 0.86	23.97 ± 0.68	18.32 ± 0.59	0.323	0.646	0.31		0.26581	0.531621	-0.39
1622	102171029	GCC1	1.75 ± 0.07	1.87 ± 0.13	1.15 ± 0.08	0.786	1	0.09		0.298903	0.597806	-0.71
1623	102171030	KCP	2.45 ± 0.13	3.38 ± 0.11	3.46 ± 0.18	0.0503	0.1006	0.46		0.777476	1	0.04
1624	102171033	TMTC3	3.97 ± 0.19	2.85 ± 0.08	2.89 ± 0.21	0.0236	0.0472	-0.48		1	1	0.02
1625	102171034	LOC102171034	780.89 ± 82.69	698.95 ± 20.75	1232.92 ± 54.3	0.537	1	-0.16		1.4457e-75	2.9e-75	0.82
1626	102171035	TSPAN31	38.89 ± 1.36	43.3 ± 0.59	45.12 ± 1.41	0.624	1	0.16		0.951456	1	0.06
1627	102171037	RBFOX2	7.65 ± 0.12	8.78 ± 0.2	8.44 ± 0.34	0.6	1	0.2		0.972961	1	-0.06
1628	102171038	ZNHIT2	11.12 ± 1.06	8.43 ± 0.19	8.56 ± 0.73	0.285	0.57	-0.4		0.972941	1	0.02
1629	102171045	SNX12	18.21 ± 0.29	15.69 ± 0.1	15.67 ± 0.4	0.302	0.604	-0.22		0.986068	1	0
1630	102171046	OTUD5	29.18 ± 0.49	26.74 ± 0.69	42.26 ± 1.64	0.57	1	-0.13		0.00525046	0.0105009	0.66
1631	102171047	CASK	1.4 ± 0.04	1.46 ± 0.07	1.48 ± 0.03	0.885	1	0.06		1	1	0.03
1632	102171051	LOC102171051	16.16 ± 0.81	3.48 ± 0.15	4.08 ± 0.29	0.00038	0.00076	-2.22	DN	0.890824	1	0.23
1633	102171060	HCN2	15 ± 0.44	12.78 ± 0.56	29.83 ± 0.87	0.29	0.58	-0.23		8.31576e-05	0.0001664	1.22	UP
1634	102171061	LOC102171061	3.6 ± 0.04	2.07 ± 0.06	2.4 ± 0.06	0.0936	0.1872	-0.8		1	1	0.21
1635	102171064	HMGB2	15.92 ± 0.39	21.89 ± 0.77	19.24 ± 0.38	0.0278	0.0556	0.46		0.734661	1	-0.19
1636	102171067	GDA	3.73 ± 0.05	5.35 ± 0.18	9.86 ± 0.75	0.0128	0.0256	0.52		0.126063	0.252126	0.88
1637	102171069	PRPF4	8.32 ± 0.15	12.12 ± 0.14	10.57 ± 0.25	0.0061	0.0122	0.54		0.89852	1	-0.2
1638	102171071	BCKDHB	11.82 ± 0.26	14.83 ± 0.04	15.25 ± 0.59	0.166	0.332	0.33		1	1	0.04
1639	102171075	AQR	2.21 ± 0.09	2.02 ± 0.1	2.14 ± 0.04	0.596	1	-0.13		1	1	0.08
1640	102171076	BAHD1	6.45 ± 0.16	10.42 ± 0.42	8.18 ± 0.01	0.00038	0.00076	0.69		0.62836	1	-0.35
1641	102171079	COL4A1	11.46 ± 2.22	7.82 ± 0.99	3.56 ± 0.18	0.00984	0.01968	-0.55		0.000974033	0.00194807	-1.14	DN
1642	102171085	ELK4	1.67 ± 0.15	1.51 ± 0.05	1.32 ± 0.19	0.782	1	-0.14		0.67026	1	-0.2
1643	102171087	ZBTB41	1.32 ± 0.1	1.43 ± 0.05	1.19 ± 0.03	0.702	1	0.11		1	1	-0.26
1644	102171089	PXMP2	5.14 ± 0.51	2.63 ± 0.16	3.31 ± 0.12	0.0318	0.0636	-0.97		0.762604	1	0.34
1645	102171090	GCN1	12.75 ± 0.16	13.12 ± 0.63	15.08 ± 0.85	0.866	1	0.04		0.686609	1	0.2
1646	102171093	ZC3H4	6.28 ± 0.44	3.46 ± 0.2	3.87 ± 0.33	0.00038	0.00076	-0.86		0.894267	1	0.16
1647	102171094	INTS2	2.83 ± 0.06	3.55 ± 0.12	3.81 ± 0.13	0.148	0.296	0.33		0.941225	1	0.1
1648	102171095	MRPS7	26.51 ± 1.85	28.94 ± 0.69	29.86 ± 0.26	0.712	1	0.13		0.936795	1	0.05
1649	102171097	CRYZL1	12.72 ± 0.84	9.79 ± 0.25	9.62 ± 0.12	0.0956	0.1912	-0.38		0.995844	1	-0.03
1650	102171099	ENC1	5.61 ± 0.03	8.44 ± 0.2	4.17 ± 0.18	0.00156	0.00312	0.59		0.0011488	0.00229759	-1.02	DN
1651	102171100	CD47	19.24 ± 0.94	12.8 ± 0.59	8.34 ± 0.41	0.00181	0.00362	-0.59		0.258014	0.516028	-0.62
1652	102171101	FYTTD1	12.34 ± 0.35	15.38 ± 0.29	11.27 ± 0.28	0.0956	0.1912	0.32		0.372236	0.744472	-0.45
1653	102171102	NIPBL	5.91 ± 0.26	4.2 ± 0.07	4.34 ± 0.11	0.00647	0.01294	-0.49		0.986068	1	0.05
1654	102171103	SPTSSB	80.97 ± 4.8	90.08 ± 1.6	79.97 ± 5.97	0.5	1	0.15		0.230811	0.461622	-0.17
1655	102171104	PAX9	69.44 ± 2.12	88.52 ± 3.26	103.65 ± 1.45	0.0761	0.1522	0.35		0.258014	0.516028	0.23
1656	102171107	TMEM43	7.01 ± 0.17	5.12 ± 0.04	4.69 ± 0.11	0.0845	0.169	-0.45		1	1	-0.13
1657	102171109	LEMD2	23.66 ± 0.54	20.13 ± 0.48	18.51 ± 0.05	0.266	0.532	-0.23		0.908346	1	-0.12
1658	102171113	UBR4	9.47 ± 0.04	9.01 ± 0.41	11.46 ± 0.57	0.757	1	-0.07		0.583916	1	0.35
1659	102171117	ETV3	8.74 ± 0.2	5.78 ± 0.05	7.64 ± 0.1	0.00129	0.00258	-0.6		0.737093	1	0.4
1660	102171119	LOC102171119	1.96 ± 0.25	1.63 ± 0.07	1.19 ± 0.06	0.353	0.706	-0.27		0.391128	0.782257	-0.45
1661	102171120	PALB2	3.16 ± 0.27	4.72 ± 0.46	3.1 ± 0.34	0.456	0.912	0.58		0.537772	1	-0.61
1662	102171122	METTL22	41.28 ± 3.06	47.42 ± 1.46	52.99 ± 2.32	0.328	0.656	0.2		0.524522	1	0.16
1663	102171123	KIF20B	1.35 ± 0.07	1.84 ± 0.04	1.08 ± 0.23	0.0923	0.1846	0.45		0.298903	0.597806	-0.77
1664	102171124	PGAM1	106.7 ± 5.66	85.73 ± 1.82	85.77 ± 2.83	0.111	0.222	-0.32		0.990318	1	0
1665	102171125	FAM126A	0.96 ± 0.07	1.77 ± 0.06	1.26 ± 0.15	0.00129	0.00258	0.89		0.422997	0.845994	-0.49
1666	102171131	SMARCD1	4.11 ± 0.23	3.17 ± 0.05	3.53 ± 0.15	0.142	0.284	-0.37		0.498305	0.996609	0.16
1667	102171136	ITFG2	3.09 ± 0.32	2.54 ± 0.07	2 ± 0.05	0.319	0.638	-0.29		0.422172	0.844343	-0.34
1668	102171138	LIAS	11.9 ± 0.22	12.48 ± 0.33	11.44 ± 0.58	0.815	1	0.07		0.930809	1	-0.13
1669	102171143	LOC102171143	0.94 ± 0.16	1.32 ± 0.19	1.24 ± 0.22	0.23	0.46	0.5		0.808253	1	-0.09
1670	102171147	RELB	1.92 ± 0.05	3.55 ± 0.13	2.02 ± 0.03	0.011	0.022	0.89		0.181602	0.363205	-0.81
1671	102171149	LOC102171149	896.44 ± 72	918.31 ± 1.72	1060.66 ± 22.51	0.889	1	0.03		2.1391e-07	4.28e-07	0.21
1672	102171151	HR	40.24 ± 2.32	29.77 ± 1.06	37.8 ± 0.66	0.0209	0.0418	-0.43		0.258783	0.517566	0.34
1673	102171152	CNTFR	4.39 ± 0.31	3.62 ± 0.14	6.79 ± 0.51	0.407	0.814	-0.28		0.31521	0.63042	0.91
1674	102171153	LOC102171153	2.95 ± 0.37	2.7 ± 0.05	1.85 ± 0.21	0.811	1	-0.13		0.422172	0.844343	-0.55
1675	102171156	PIAS1	4.14 ± 0.19	4.35 ± 0.07	4.2 ± 0.24	0.836	1	0.07		1	1	-0.05
1676	102171157	NGDN	11.02 ± 0.64	12.73 ± 0.58	10.2 ± 0.34	0.435	0.87	0.21		0.559604	1	-0.32
1677	102171159	CA12	196.26 ± 7.48	319.45 ± 10.86	508.87 ± 15.72	0.00513	0.01026	0.7		2.80095e-31	5.6e-31	0.67
1678	102171162	SOCS5	3.26 ± 0.04	3.18 ± 0.2	2.62 ± 0.14	0.906	1	-0.04		0.6445	1	-0.28
1679	102171169	PROCR	4.19 ± 0.24	3.65 ± 0.26	6.52 ± 0.26	0.597	1	-0.2		0.342855	0.685711	0.84
1680	102171171	ATP6V1C1	12.19 ± 0.31	11.69 ± 0.13	11.2 ± 0.48	0.819	1	-0.06		0.952417	1	-0.06
1681	102171172	CPNE3	31.93 ± 1.29	44.18 ± 0.75	45.76 ± 0.62	0.0185	0.037	0.47		0.856203	1	0.05
1682	102171173	GEM	5.6 ± 1.43	6.96 ± 0.71	1.49 ± 0.2	0.251	0.502	0.31		0.00539535	0.0107907	-2.22	DN
1683	102171177	SMYD3	4.69 ± 0.2	4.34 ± 0.13	2.78 ± 0.12	0.745	1	-0.11		0.498305	0.99661	-0.65
1684	102171179	GATB	14.49 ± 0.76	12.08 ± 0.34	17.02 ± 0.44	0.211	0.422	-0.26		0.258014	0.516028	0.49
1685	102171185	CD3EAP	3.67 ± 0.23	7.3 ± 0.27	4.28 ± 0.14	0.0213	0.0426	0.99		0.325977	0.651954	-0.77
1686	102171188	RASD1	2.23 ± 1.13	1.04 ± 0.07	0.6 ± 0.05	0.858	1	-1.11		1	1	-0.78
1687	102171189	AARSD1	25.71 ± 1.67	31.91 ± 0.54	27.92 ± 1.39	0.108	0.216	0.31		0.76064	1	-0.19
1688	102171191	ARL16	5.85 ± 0.45	3.71 ± 0.2	4.9 ± 0.3	0.105	0.21	-0.66		0.85757	1	0.4
1689	102171193	MTRR	12.63 ± 0.72	11.69 ± 0.14	14.35 ± 0.03	0.625	1	-0.11		0.773225	1	0.3
1690	102171194	TTC23	1.17 ± 0.19	1 ± 0.1	0.53 ± 0.04	0.934	1	-0.23		0.789379	1	-0.91
1691	102171199	SF3B1	32.93 ± 2.28	40.43 ± 0.27	30.95 ± 0.43	0.16	0.32	0.3		0.174884	0.349768	-0.39
1692	102171201	OTUD3	9.13 ± 0.16	7.7 ± 0.26	7.88 ± 0.1	0.216	0.432	-0.25		0.994112	1	0.03
1693	102171203	FKBPL	4.43 ± 0.37	2.18 ± 0.12	2.17 ± 0.12	0.00451	0.00902	-1.02	DN	1	1	-0.01
1694	102171204	IGSF9	4.46 ± 0.12	2 ± 0.04	4.76 ± 0.22	0.00038	0.00076	-1.16	DN	0.0247131	0.0494262	1.25	UP
1695	102171206	LOC102171206	8.09 ± 0.66	1.13 ± 0.12	4.35 ± 0.42	0.00647	0.01294	-2.84	DN	0.0833177	0.166635	1.94
1696	102171208	NME4	77.13 ± 5.56	63.37 ± 0.47	102.38 ± 7.59	0.161	0.322	-0.28		4.01571e-05	8.04e-05	0.69
1697	102171211	PDAP1	95.62 ± 6.26	143.45 ± 6.25	120.45 ± 5.34	0.00129	0.00258	0.59		0.0166116	0.0332233	-0.25
1698	102171213	ATG16L1	4.36 ± 0.23	5.45 ± 0.02	3.51 ± 0.09	0.167	0.334	0.32		0.697857	1	-0.64
1699	102171215	TRIL	3.27 ± 0.13	1.66 ± 0.07	1.95 ± 0.08	0.000707	0.001414	-0.98		1	1	0.23
1700	102171217	RPS24	1379.74 ± 112.86	1394 ± 34.52	1764.6 ± 18.44	0.961	1	0.01		6.1587e-26	1.232e-25	0.34
1701	102171218	CEP295	2.23 ± 0.22	1.85 ± 0.07	1.5 ± 0.04	0.518	1	-0.27		1	1	-0.3
1702	102171222	SSPN	2.72 ± 0.73	2.87 ± 0.33	1.84 ± 0.07	0.809	1	0.08		0.513173	1	-0.64
1703	102171224	NDUFA6	163.5 ± 19.48	186.99 ± 10.68	228.98 ± 11.07	0.341	0.682	0.19		0.00381586	0.00763172	0.29
1704	102171233	RPL18A	4695.22 ± 292.23	4486.01 ± 54.76	7136.4 ± 248.7	0.863	1	-0.07		3.28811e-248	6.58e-248	0.67
1705	102171234	BEST2	1.57 ± 0.12	4.63 ± 0.22	3.64 ± 0.09	0.00038	0.00076	1.56	UP	0.85757	1	-0.35
1706	102171236	TRAPPC5	138.57 ± 11.01	111.4 ± 0.69	180.2 ± 1.73	0.0968	0.1936	-0.31		9.99511e-12	2e-11	0.69
1707	102171243	TLE4	7.6 ± 0.09	6.7 ± 0.13	9.96 ± 0.1	0.402	0.804	-0.18		0.383144	0.766288	0.57
1708	102171248	JKAMP	7.87 ± 0.27	9.65 ± 0.5	6.78 ± 0.51	0.247	0.494	0.29		0.506593	1	-0.51
1709	102171249	TMED10	44.86 ± 0.66	58.01 ± 2.15	55.85 ± 1.99	0.0523	0.1046	0.37		0.940888	1	-0.05
1710	102171252	SLC25A25	4.63 ± 0.19	15.1 ± 0.63	27.64 ± 0.41	0.00038	0.00076	1.71	UP	0.00341507	0.00683014	0.87
1711	102171253	SNAPC4	2.75 ± 0.41	2.38 ± 0.1	1.29 ± 0.05	0.475	0.95	-0.21		0.229604	0.459207	-0.88
1712	102171255	GJB6	1.68 ± 0.18	0.97 ± 0.07	1.82 ± 0.14	0.000707	0.001414	-0.79		0.391128	0.782256	0.91
1713	102171258	TMEM230	25.37 ± 0.98	33.7 ± 0.49	28.44 ± 0.85	0.0278	0.0556	0.41		0.470645	0.94129	-0.24
1714	102171259	AURKA	0.92 ± 0.03	1.54 ± 0.08	1.25 ± 0.14	0.00387	0.00774	0.73		0.6434	1	-0.3
1715	102171262	MYC	20.72 ± 0.4	20.82 ± 0.77	24.82 ± 0.72	0.98	1	0.01		0.550431	1	0.25
1716	102171265	SERPINH1	81.72 ± 2.21	74.25 ± 1.9	79.58 ± 1.02	0.513	1	-0.14		0.799679	1	0.1
1717	102171267	METTL18	2.32 ± 0.04	3.81 ± 0.05	1.88 ± 0.23	0.0434	0.0868	0.71		0.000756845	0.00151369	-1.02	DN
1718	102171268	ZNF565	2.86 ± 0.18	1.97 ± 0.1	1.74 ± 0.03	0.14	0.28	-0.53		1	1	-0.18
1719	102171270	NOSIP	21.14 ± 0.93	20.86 ± 0.19	22.66 ± 1.02	0.941	1	-0.02		0.839503	1	0.12
1720	102171274	GIT1	12.85 ± 0.52	10.47 ± 0.34	13.37 ± 0.72	0.151	0.302	-0.3		0.612781	1	0.35
1721	102171275	PRR15L	4.55 ± 0.41	2.85 ± 0.11	3.41 ± 0.05	0.0554	0.1108	-0.68		1	1	0.26
1722	102171276	CDK5RAP3	19.24 ± 1.46	18.33 ± 0.42	18.32 ± 0.15	0.767	1	-0.07		0.97047	1	0
1723	102171277	BACH1	3.78 ± 0.09	2.55 ± 0.05	3.09 ± 0.03	0.00591	0.01182	-0.57		1	1	0.28
1724	102171278	TRIM65	14.82 ± 0.29	8.43 ± 0.41	6.62 ± 0.41	0.00038	0.00076	-0.81		0.666519	1	-0.35
1725	102171279	EDC3	5.21 ± 0.27	6.94 ± 0.21	5.3 ± 0.33	0.115	0.23	0.41		0.719807	1	-0.39
1726	102171281	CINP	37.34 ± 2.78	33.01 ± 1.57	42.4 ± 1.71	0.42	0.84	-0.18		0.343524	0.687048	0.36
1727	102171282	LOC102171282	27.75 ± 3.12	34.54 ± 2.38	60.24 ± 3.89	0.57	1	0.32		9.6972e-06	1.94e-05	0.8
1728	102171284	CMTM6	45.25 ± 0.85	61.66 ± 0.45	58.15 ± 0.73	0.0155	0.031	0.45		0.8014	1	-0.08
1729	102171285	TRAK2	4.16 ± 0.22	5.05 ± 0.1	4.75 ± 0.05	0.178	0.356	0.28		1	1	-0.09
1730	102171290	SELENBP1	820.14 ± 29.11	776.26 ± 22.05	1533.34 ± 81.42	0.818	1	-0.08		4.9783e-146	9.96e-146	0.98
1731	102171294	DCTPP1	6.48 ± 0.53	9.01 ± 0.17	8.06 ± 0.25	0.113	0.226	0.47		0.844218	1	-0.16
1732	102171295	PRKAA2	1.01 ± 0.05	1.06 ± 0.03	1 ± 0.02	0.845	1	0.06		1	1	-0.08
1733	102171296	VKORC1	43.02 ± 1.15	43.97 ± 0.34	52.21 ± 1.74	0.909	1	0.03		0.451476	0.902953	0.25
1734	102171300	ARF5	22.64 ± 1.59	25.52 ± 0.98	25.95 ± 0.71	0.466	0.932	0.17		0.962502	1	0.02
1735	102171303	WDR60	1.29 ± 0.09	0.95 ± 0.02	0.98 ± 0.03	0.271	0.542	-0.44		1	1	0.04
1736	102171306	CDK4	36.63 ± 1.9	48.23 ± 0.48	46.95 ± 0.61	0.153	0.306	0.4		0.982412	1	-0.04
1737	102171307	SYVN1	9.25 ± 0.2	15.99 ± 0.55	9.99 ± 0.35	0.0122	0.0244	0.79		0.147695	0.29539	-0.68
1738	102171312	IL13RA1	31.78 ± 0.63	25.85 ± 0.35	26.78 ± 0.76	0.117	0.234	-0.3		0.992082	1	0.05
1739	102171314	NUP50	24.74 ± 1.06	27.48 ± 1.24	32.42 ± 1	0.481	0.962	0.15		0.555506	1	0.24
1740	102171315	LOC102171315	35.47 ± 1.59	33.97 ± 0.84	37.28 ± 0.39	0.827	1	-0.06		0.722977	1	0.13
1741	102171321	G6PD	38.31 ± 1.19	50.03 ± 1.85	61.2 ± 3.92	0.113	0.226	0.39		0.226877	0.453754	0.29
1742	102171325	TOLLIP	64.24 ± 2.84	67.06 ± 1.65	66.45 ± 1.58	0.787	1	0.06		0.967135	1	-0.01
1743	102171327	POLRMT	9.75 ± 0.46	9.34 ± 0.54	11.57 ± 0.63	0.802	1	-0.06		0.6635	1	0.31
1744	102171330	MSH3	3.05 ± 0.07	2.4 ± 0.07	3.67 ± 0.06	0.192	0.384	-0.35		0.143945	0.287891	0.61
1745	102171331	LOC102171331	4.79 ± 0.89	8.33 ± 0.32	4.73 ± 0.17	0.000707	0.001414	0.8		0.26581	0.531621	-0.82
1746	102171334	ZFAND5	31.27 ± 1.58	29.35 ± 0.32	39.69 ± 0.59	0.681	1	-0.09		0.105304	0.210609	0.44
1747	102171335	C8H9orf89	9.04 ± 0.25	5.69 ± 0.23	5.82 ± 0.31	0.0598	0.1196	-0.67		0.990335	1	0.03
1748	102171336	TMEM38B	8.6 ± 1.08	7.01 ± 0.36	6.66 ± 0.29	0.432	0.864	-0.3		0.93228	1	-0.07
1749	102171338	HACE1	4.72 ± 0.02	3.77 ± 0.1	4.99 ± 0.1	0.184	0.368	-0.32		0.816131	1	0.4
1750	102171341	ZNF770	1.73 ± 0.09	1.12 ± 0.01	0.59 ± 0.02	0.0655	0.131	-0.63		1	1	-0.93
1751	102171342	CHST14	3.58 ± 0.12	1.61 ± 0.17	1.26 ± 0.09	0.00407	0.00814	-1.16	DN	0.6434	1	-0.35
1752	102171343	VTI1B	73.97 ± 5.14	79.93 ± 1.36	89.6 ± 2.58	0.613	1	0.11		0.460938	0.921877	0.16
1753	102171347	COL4A2	8.63 ± 1.56	5.88 ± 0.7	2.82 ± 0.16	0.00876	0.01752	-0.55		3.02e-06	6.04e-06	-1.06	DN
1754	102171348	ITIH5	3.18 ± 0.41	2.86 ± 0.37	1.38 ± 0.09	0.536	1	-0.15		0.011643	0.0232859	-1.05	DN
1755	102171350	SERINC3	46.71 ± 1.93	32.9 ± 0.73	32.62 ± 0.59	0.00706	0.01412	-0.51		1	1	-0.01
1756	102171352	EXOSC4	16.99 ± 2.01	26.42 ± 0.94	18.74 ± 0.4	0.00493	0.00986	0.64		0.213111	0.426223	-0.5
1757	102171356	DDB2	6.22 ± 0.08	5.14 ± 0.18	5.95 ± 0.13	0.305	0.61	-0.28		0.838359	1	0.21
1758	102171359	EFHD2	58.75 ± 3.14	60.48 ± 1.64	63.07 ± 1.65	0.86	1	0.04		0.853219	1	0.06
1759	102171363	RPLP0	3047.33 ± 168.92	2604.85 ± 58.05	5063.58 ± 292.62	0.543	1	-0.23		2.84007e-87	5.68e-87	0.96
1760	102171364	LIMK2	46.51 ± 2.85	33.11 ± 0.69	44.96 ± 0.61	0.00876	0.01752	-0.49		0.0868785	0.173757	0.44
1761	102171366	ADGRG1	45.23 ± 1.13	55.75 ± 2.25	62.12 ± 1.66	0.128	0.256	0.3		0.682756	1	0.16
1762	102171367	BBC3	5.56 ± 0.38	1.49 ± 0.25	7.68 ± 0.55	0.00473	0.00946	-1.9	DN	0.00204709	0.00409417	2.36	UP
1763	102171369	MIF4GD	35.48 ± 1.49	44.07 ± 0.18	57.3 ± 1.94	0.234	0.468	0.31		0.0628494	0.125699	0.38
1764	102171371	MRC2	3.05 ± 0.22	1.3 ± 0.09	1.93 ± 0.05	0.00038	0.00076	-1.23	DN	0.298903	0.597805	0.58
1765	102171372	MINA	7.91 ± 0.45	20.8 ± 0.19	12.24 ± 0.34	0.00038	0.00076	1.39	UP	0.0385778	0.0771555	-0.77
1766	102171375	TRIM23	4.56 ± 0.14	3.16 ± 0.15	2.72 ± 0.09	0.0746	0.1492	-0.53		1	1	-0.21
1767	102171376	KIAA0226	2.24 ± 0.05	4.65 ± 0.16	3.5 ± 0.07	0.00038	0.00076	1.05	UP	0.687993	1	-0.41
1768	102171379	LRRC58	3.25 ± 0.18	2.42 ± 0.2	2.54 ± 0.14	0.223	0.446	-0.42		0.873483	1	0.07
1769	102171383	FOXP1	9.24 ± 0.32	6.52 ± 0.17	8.72 ± 0.14	0.00407	0.00814	-0.5		0.673675	1	0.42
1770	102171384	MAP4	34.59 ± 0.37	37.17 ± 1.05	34.06 ± 1.48	0.651	1	0.1		0.702745	1	-0.13
1771	102171385	TTLL4	3.77 ± 0.03	4.27 ± 0.16	4.42 ± 0.33	0.468	0.936	0.18		0.89852	1	0.05
1772	102171387	PID1	8 ± 0.41	8.17 ± 0.28	7.98 ± 0.12	0.915	1	0.03		1	1	-0.03
1773	102171389	CNKSR1	4.34 ± 0.09	4.41 ± 0.09	5.54 ± 0.25	0.952	1	0.02		0.722977	1	0.33
1774	102171390	MCM3	7.57 ± 0.15	13.83 ± 0.2	12.39 ± 0.19	0.00038	0.00076	0.87		0.814791	1	-0.16
1775	102171391	IFFO2	10.16 ± 0.55	16.73 ± 0.96	11.81 ± 0.19	0.00038	0.00076	0.72		0.422796	0.845592	-0.5
1776	102171394	PYGO2	13.23 ± 0.27	8.75 ± 0.07	8.37 ± 0.14	0.0023	0.0046	-0.6		0.942251	1	-0.06
1777	102171395	LOC102171395	24.8 ± 2.19	7.48 ± 0.44	15.46 ± 0.31	0.00038	0.00076	-1.73	DN	2.24e-20	4.48e-20	1.05	UP
1778	102171396	DCTN5	8.68 ± 0.27	13.09 ± 0.1	10.75 ± 0.25	0.0023	0.0046	0.59		0.722977	1	-0.28
1779	102171399	EXOSC1	8.17 ± 0.32	12.3 ± 0.39	9.25 ± 0.23	0.0261	0.0522	0.59		0.555831	1	-0.41
1780	102171405	HEATR1	3.84 ± 0.07	4.55 ± 0.11	3.73 ± 0.13	0.234	0.468	0.25		0.89852	1	-0.29
1781	102171409	MYL6B	6.96 ± 0.54	8.14 ± 0.41	8.45 ± 0.26	0.558	1	0.23		0.994385	1	0.06
1782	102171412	NGFRAP1	3.11 ± 0.24	5.1 ± 0.32	2.05 ± 0.03	0.068	0.136	0.71		0.00246786	0.00493571	-1.32	DN
1783	102171413	FKBP4	129.12 ± 9.9	187.85 ± 5.14	202.56 ± 8.82	0.00949	0.01898	0.54		0.23766	0.47532	0.11
1784	102171414	FUNDC2	51.37 ± 4.13	49.82 ± 1.18	66.55 ± 1.59	0.86	1	-0.04		0.0228474	0.0456949	0.42
1785	102171421	CLPTM1	46.69 ± 0.29	46.14 ± 1.67	67.48 ± 2.04	0.945	1	-0.02		0.00369047	0.00738094	0.55
1786	102171423	NANS	22.21 ± 2.06	35.55 ± 1.03	38.73 ± 1.48	0.00038	0.00076	0.68		0.823305	1	0.12
1787	102171424	RPP25L	12.06 ± 0.37	9.26 ± 0.16	8.42 ± 0.29	0.114	0.228	-0.38		0.972961	1	-0.14
1788	102171425	LOC102171425	30.66 ± 0.25	32.2 ± 0.9	34.85 ± 0.71	0.76	1	0.07		0.735782	1	0.11
1789	102171428	CALML4	1.36 ± 0.17	2.58 ± 0.2	1.62 ± 0.17	0.0771	0.1542	0.92		0.405671	0.811342	-0.67
1790	102171430	NDRG2	14.82 ± 1.54	12.21 ± 0.63	12.53 ± 0.6	0.198	0.396	-0.28		0.903715	1	0.04
1791	102171433	PCGF1	5.91 ± 0.06	3.8 ± 0.1	2.94 ± 0.17	0.0843	0.1686	-0.64		0.498305	0.99661	-0.37
1792	102171435	MCFD2	26.13 ± 0.75	30.46 ± 0.53	26.17 ± 1.37	0.267	0.534	0.22		0.627133	1	-0.22
1793	102171440	JPH1	0.82 ± 0.03	1.4 ± 0.07	1.79 ± 0.04	0.00156	0.00312	0.77		0.298903	0.597805	0.36
1794	102171441	AZIN1	14.52 ± 0.34	26.07 ± 0.71	17.86 ± 0.34	0.00038	0.00076	0.84		0.198361	0.396723	-0.55
1795	102171442	WWP1	6.96 ± 0.19	5.5 ± 0.07	5.62 ± 0.2	0.0932	0.1864	-0.34		0.956625	1	0.03
1796	102171447	TIMM10	55.13 ± 3.29	51.55 ± 1.36	45.54 ± 1.39	0.693	1	-0.1		0.615489	1	-0.18
1797	102171449	SMG7	7.85 ± 0.11	5.64 ± 0.18	7.97 ± 0.33	0.0162	0.0324	-0.48		0.648463	1	0.5
1798	102171450	C16H1orf53	27.95 ± 0.67	15.86 ± 0.8	23.53 ± 1.65	0.0474	0.0948	-0.82		0.204468	0.408936	0.57
1799	102171451	FAM160A1	24.02 ± 1.21	29.95 ± 1.31	28.59 ± 0.52	0.0985	0.197	0.32		0.89852	1	-0.07
1800	102171454	DEF8	4.68 ± 0.09	3.05 ± 0.03	3.59 ± 0.16	0.00206	0.00412	-0.62		0.583207	1	0.24
1801	102171455	CIRH1A	11.53 ± 0.07	23.94 ± 0.99	15.21 ± 0.31	0.00038	0.00076	1.05	UP	0.0657774	0.131555	-0.65
1802	102171459	A1BG	0.93 ± 0.07	1.73 ± 0.1	1.87 ± 0.2	0.073	0.146	0.9		1	1	0.11
1803	102171460	TRAPPC1	56.84 ± 2.07	63.34 ± 0.73	75.55 ± 2.62	0.475	0.95	0.16		0.386101	0.772203	0.25
1804	102171464	FASTKD3	2.3 ± 0.12	4.81 ± 0.06	3.02 ± 0.1	0.00101	0.00202	1.06	UP	0.487687	0.975374	-0.67
1805	102171465	TM4SF1	52.23 ± 1.59	38.29 ± 3.08	22.9 ± 2.28	0.0157	0.0314	-0.45		0.00971135	0.0194227	-0.74
1806	102171466	LOC102171466	1.68 ± 0.65	1.44 ± 0.18	1.76 ± 0.13	0.896	1	-0.22		0.422997	0.845993	0.29
1807	102171468	ZRANB3	2.28 ± 0.11	1.78 ± 0.04	1.86 ± 0.07	0.204	0.408	-0.36		1	1	0.07
1808	102171470	NPRL2	8.15 ± 0.12	10.16 ± 0.3	11.01 ± 0.32	0.214	0.428	0.32		0.979593	1	0.12
1809	102171471	PRKCD	11.65 ± 0.32	9.32 ± 0.44	10.74 ± 0.25	0.121	0.242	-0.32		0.862582	1	0.2
1810	102171473	VSIG8	55.72 ± 2.72	85.85 ± 2.61	70.52 ± 4.25	0.00038	0.00076	0.62		0.173049	0.346099	-0.28
1811	102171475	LOC102171475	2.02 ± 0.04	1.7 ± 0.08	2.3 ± 0.16	0.456	0.912	-0.25		0.861114	1	0.43
1812	102171476	RAB11FIP3	6.57 ± 0.19	6.28 ± 0.21	5.93 ± 0.16	0.833	1	-0.06		0.990335	1	-0.08
1813	102171477	TRAF7	26.5 ± 0.39	30.35 ± 0.32	31.94 ± 1.07	0.335	0.67	0.2		0.901297	1	0.07
1814	102171479	PARN	10.03 ± 0.23	6.33 ± 0.09	7.9 ± 0.09	0.0104	0.0208	-0.66		0.697857	1	0.32
1815	102171482	BUD31	38.41 ± 1.04	45.83 ± 1.65	43.45 ± 2.11	0.3	0.6	0.26		0.952286	1	-0.08
1816	102171483	CDC20	1.76 ± 0.04	4.33 ± 0.22	4.53 ± 0.09	0.00038	0.00076	1.3	UP	0.89852	1	0.07
1817	102171484	BRI3	114.09 ± 1.71	82.85 ± 2	103.12 ± 4.63	0.0185	0.037	-0.46		0.161337	0.322674	0.32
1818	102171485	DGKD	1.49 ± 0.05	1.3 ± 0.07	1.13 ± 0.05	0.607	1	-0.19		1	1	-0.2
1819	102171487	HIBADH	41.98 ± 1.66	38.9 ± 0.28	43.92 ± 0.77	0.619	1	-0.11		0.600027	1	0.17
1820	102171492	LOC102171492	11.54 ± 0.72	7.79 ± 0.13	7.96 ± 0.74	0.0732	0.1464	-0.57		0.970483	1	0.03
1821	102171500	FBXL5	15.24 ± 0.46	15.16 ± 0.66	16.43 ± 0.29	0.978	1	-0.01		0.942863	1	0.12
1822	102171502	RUNDC3B	3.2 ± 0.1	3.36 ± 0.07	2.39 ± 0.1	0.802	1	0.07		0.422172	0.844343	-0.49
1823	102171505	DHPS	41.49 ± 1.98	41.11 ± 0.93	60.21 ± 2.76	0.963	1	-0.01		0.00427517	0.00855035	0.55
1824	102171508	PNPLA6	7.78 ± 0.31	5.44 ± 0.14	7.5 ± 0.33	0.00667	0.01334	-0.51		0.618783	1	0.46
1825	102171509	UBXN6	80.47 ± 4.5	51.81 ± 2.18	86.23 ± 3.94	0.00101	0.00202	-0.64		4.59649e-06	9.2e-06	0.73
1826	102171520	FOS	8.76 ± 0.56	15.19 ± 0.41	42.47 ± 1.01	0.00038	0.00076	0.8		3.68919e-09	7.38e-09	1.48	UP
1827	102171521	EIF2AK2	10.99 ± 0.32	10.41 ± 0.5	6.2 ± 0.31	0.778	1	-0.08		0.239823	0.479646	-0.75
1828	102171522	FOSL2	93.28 ± 1.86	50.2 ± 1.21	85.17 ± 1.45	0.00038	0.00076	-0.89		3.40777e-06	6.82e-06	0.76
1829	102171524	SDCCAG3	12.72 ± 0.23	14.4 ± 0.16	12.72 ± 0.1	0.42	0.84	0.18		0.838359	1	-0.18
1830	102171526	XRN2	9.75 ± 0.06	15.68 ± 0.28	10.63 ± 0.23	0.00038	0.00076	0.69		0.247707	0.495413	-0.56
1831	102171531	ADHFE1	3.65 ± 0.28	2.43 ± 0.01	3.43 ± 0.03	0.0844	0.1688	-0.58		0.422171	0.844342	0.49
1832	102171534	SCYL3	5.38 ± 0.21	6.46 ± 0.16	5.35 ± 0.04	0.291	0.582	0.26		0.754907	1	-0.27
1833	102171536	PLEKHN1	8.72 ± 0.27	12.25 ± 0.31	9.86 ± 0.13	0.0152	0.0304	0.49		0.705804	1	-0.31
1834	102171539	BCKDHA	117.75 ± 7.15	110.56 ± 4.61	192.67 ± 10.45	0.696	1	-0.09		4.5879e-14	9.18e-14	0.8
1835	102171540	PRRG2	7.48 ± 0.46	10.76 ± 0.35	8.92 ± 0.17	0.0361	0.0722	0.52		0.762057	1	-0.27
1836	102171543	TAF15	32.29 ± 0.46	34.54 ± 0.76	33.32 ± 0.59	0.655	1	0.1		0.986068	1	-0.05
1837	102171544	ANKRD13B	2.95 ± 0.08	3.36 ± 0.17	4.17 ± 0.28	0.586	1	0.19		0.839503	1	0.31
1838	102171545	PNPO	6.9 ± 0.28	10.38 ± 0.19	9.01 ± 0.08	0.0023	0.0046	0.59		0.83285	1	-0.2
1839	102171546	SP2	3.57 ± 0.02	2.92 ± 0.18	4.27 ± 0.17	0.303	0.606	-0.29		0.722977	1	0.55
1840	102171548	TRIM47	37.07 ± 1.4	31.82 ± 0.44	28.21 ± 0.31	0.277	0.554	-0.22		0.686671	1	-0.17
1841	102171553	PPIG	7.69 ± 0.09	9.05 ± 0.23	3.73 ± 0.57	0.311	0.622	0.23		0.0252754	0.0505508	-1.28
1842	102171554	TANC1	22.09 ± 0.54	15.99 ± 0.6	19.88 ± 0.17	0.0114	0.0228	-0.47		0.559604	1	0.31
1843	102171556	LOC102171556	206.65 ± 7.01	210.5 ± 6.6	239.19 ± 10.61	0.937	1	0.03		0.248265	0.49653	0.18
1844	102171557	PPP2R5D	22.58 ± 0.77	17.1 ± 0.44	21.51 ± 0.7	0.438	0.876	-0.4		0.523105	1	0.33
1845	102171560	PVRL4	43.58 ± 0.91	39.73 ± 1.59	30.03 ± 1.17	0.541	1	-0.13		0.24853	0.49706	-0.4
1846	102171561	PIK3C3	7.69 ± 0.35	6.89 ± 0.12	6.93 ± 0.23	0.493	0.986	-0.16		1	1	0.01
1847	102171562	RFX5	1.58 ± 0.12	0.99 ± 0.03	0.98 ± 0.02	0.0378	0.0756	-0.67		1	1	-0.01
1848	102171564	MBD2	214.99 ± 4.75	149.83 ± 4.14	214.13 ± 9.58	0.0061	0.0122	-0.52		4.68861e-07	9.38e-07	0.52
1849	102171565	ZRANB2	18.54 ± 0.94	22.15 ± 0.49	15.26 ± 1.12	0.185	0.37	0.26		0.209366	0.418731	-0.54
1850	102171566	SEPHS2	29.85 ± 1.32	48.3 ± 0.73	44.37 ± 0.79	0.00038	0.00076	0.69		0.698443	1	-0.12
1851	102171567	PPAP2B	15.56 ± 1.36	11.39 ± 0.64	9.27 ± 0.58	0.0182	0.0364	-0.45		0.648463	1	-0.3
1852	102171572	SMO	3.96 ± 0.13	1.76 ± 0.06	1.63 ± 0.02	0.00038	0.00076	-1.17	DN	1	1	-0.11
1853	102171575	IRAK4	2.61 ± 0.07	2.55 ± 0.09	1.77 ± 0.03	0.946	1	-0.03		0.422172	0.844343	-0.52
1854	102171576	OS9	73.67 ± 4.4	63.34 ± 2.94	73.31 ± 2.48	0.294	0.588	-0.22		0.296126	0.592253	0.21
1855	102171577	FIBP	49.67 ± 1.67	59.23 ± 1.73	68.75 ± 2.92	0.192	0.384	0.25		0.341907	0.683814	0.22
1856	102171581	CMAS	13.76 ± 0.09	21.81 ± 0.9	20.44 ± 0.36	0.00038	0.00076	0.66		0.914837	1	-0.09
1857	102171586	ARHGAP8	2.1 ± 0.07	2.88 ± 0.05	2.8 ± 0.06	0.171	0.342	0.45		1	1	-0.04
1858	102171587	SEC24B	6.35 ± 0.36	7.23 ± 0.13	5.82 ± 0.2	0.389	0.778	0.19		0.816131	1	-0.31
1859	102171588	DDX3X	54.73 ± 1.89	61.88 ± 1.76	50.95 ± 0.86	0.398	0.796	0.18		0.214058	0.428116	-0.28
1860	102171589	TMEM47	2 ± 0.55	2.33 ± 0.34	2.09 ± 0.34	0.522	1	0.22		1	1	-0.16
1861	102171591	IKBKG	7.77 ± 0.02	8.52 ± 0.29	8.99 ± 0.28	0.716	1	0.13		0.942251	1	0.08
1862	102171596	MBOAT7	9.91 ± 0.28	9.57 ± 0.43	10.55 ± 0.19	0.93	1	-0.05		0.977976	1	0.14
1863	102171605	ALDH1A1	596.16 ± 34.31	854.47 ± 8.59	943.79 ± 22.86	0.0785	0.157	0.52		0.0160329	0.0320658	0.14
1864	102171606	NINJ1	4.55 ± 0.43	5.38 ± 0.26	4.74 ± 0.16	0.547	1	0.24		0.952407	1	-0.18
1865	102171607	ZNF462	1.42 ± 0.03	1.6 ± 0.03	1.43 ± 0.08	0.495	0.99	0.17		0.298903	0.597806	-0.16
1866	102171608	LOC102171608	1.94 ± 0.19	3.12 ± 0.2	1.76 ± 0.16	0.186	0.372	0.69		0.422172	0.844343	-0.83
1867	102171609	AHI1	1.55 ± 0.07	1.3 ± 0.04	1.12 ± 0.05	0.453	0.906	-0.26		1	1	-0.22
1868	102171612	RPUSD2	2.06 ± 0.1	4.77 ± 0.1	3.58 ± 0.08	0.00038	0.00076	1.21	UP	0.816131	1	-0.41
1869	102171613	ARG2	1.8 ± 0.12	3.25 ± 0.17	1.21 ± 0.05	0.408	0.816	0.85		0.0745604	0.149121	-1.42
1870	102171614	SOWAHC	9.16 ± 0.15	9.72 ± 0.41	9.74 ± 0.7	0.758	1	0.08		0.916568	1	0
1871	102171615	RETSAT	13.39 ± 0.15	33.35 ± 0.6	30.82 ± 0.3	0.00407	0.00814	1.32	UP	0.855927	1	-0.11
1872	102171618	CARKD	56.87 ± 4.38	45.74 ± 1.43	58.32 ± 2.42	0.114	0.228	-0.31		0.146948	0.293897	0.35
1873	102171621	EIF6	358.25 ± 30.25	641.18 ± 5.33	532.26 ± 12.59	0.00038	0.00076	0.84		5.72043e-07	1.144e-06	-0.27
1874	102171622	ADA	4.21 ± 0.05	8.54 ± 0.49	9.48 ± 0.34	0.00038	0.00076	1.02	UP	0.821907	1	0.15
1875	102171624	PUF60	52.64 ± 2.03	47.57 ± 1.39	63.56 ± 3.23	0.483	0.966	-0.15		0.0286296	0.0572591	0.42
1876	102171625	PRKDC	1.41 ± 0.08	1.04 ± 0.02	1.16 ± 0.06	0.0417	0.0834	-0.44		1	1	0.16
1877	102171627	TRAPPC4	25.38 ± 1.08	21.31 ± 0.36	28.18 ± 0.57	0.246	0.492	-0.25		0.242993	0.485985	0.4
1878	102171628	PARVA	25.17 ± 1.19	17.06 ± 0.52	21.36 ± 1.06	0.00493	0.00986	-0.56		0.461676	0.923351	0.32
1879	102171630	NUMA1	49.33 ± 3.03	29.18 ± 1.29	43.44 ± 2.9	0.00038	0.00076	-0.76		0.030197	0.0603939	0.57
1880	102171631	PDHX	19.78 ± 0.22	20.03 ± 0.21	23.68 ± 0.62	0.945	1	0.02		0.643707	1	0.24
1881	102171634	RAB29	2.28 ± 0.03	1.82 ± 0.06	2.6 ± 0.17	0.505	1	-0.33		0.732924	1	0.51
1882	102171636	PRDM2	3.67 ± 0.16	3.26 ± 0.18	3.95 ± 0.18	0.446	0.892	-0.17		0.498305	0.996609	0.28
1883	102171637	DENND1B	2.33 ± 0.13	1.95 ± 0.05	2.21 ± 0.08	0.28	0.56	-0.25		1	1	0.18
1884	102171639	FBRSL1	4.7 ± 0.2	4.38 ± 0.17	4.43 ± 0.25	0.753	1	-0.1		0.89852	1	0.02
1885	102171640	SIRT4	2.26 ± 0.06	2.57 ± 0.04	1.86 ± 0.03	0.689	1	0.19		0.513173	1	-0.46
1886	102171641	PIK3IP1	1.55 ± 0.41	0.96 ± 0.13	0.58 ± 0.03	0.00101	0.00202	-0.69		1	1	-0.72
1887	102171642	PATZ1	1.6 ± 0.17	0.99 ± 0.03	0.75 ± 0.02	0.00038	0.00076	-0.69		1	1	-0.4
1888	102171645	NUP88	8.78 ± 0.41	9.66 ± 0.18	8.28 ± 0.19	0.559	1	0.14		0.789178	1	-0.22
1889	102171646	MED9	5.09 ± 0.22	5.7 ± 0.07	4.56 ± 0.25	0.592	1	0.16		0.621673	1	-0.32
1890	102171648	GGA3	9.56 ± 0.05	10.06 ± 0.15	9.05 ± 0.15	0.755	1	0.07		0.886735	1	-0.15
1891	102171649	RNF222	1.87 ± 0.1	1.14 ± 0.07	1.14 ± 0.09	0.102	0.204	-0.72		1	1	0
1892	102171650	LOC102171650	113.88 ± 4.64	74.68 ± 4.25	70.27 ± 5.92	0.0251	0.0502	-0.61		0.940888	1	-0.09
1893	102171653	PPWD1	7.43 ± 0.19	7 ± 0.3	5.46 ± 0.15	0.756	1	-0.09		0.6635	1	-0.36
1894	102171654	LOC102171654	17.58 ± 0.36	17.92 ± 0.5	17.31 ± 0.54	0.914	1	0.03		0.946993	1	-0.05
1895	102171656	NMD3	20.66 ± 0.89	22.69 ± 0.23	23.57 ± 0.61	0.527	1	0.14		0.990335	1	0.05
1896	102171657	FES	1.29 ± 0.13	0.93 ± 0.15	0.63 ± 0.02	0.252	0.504	-0.47		1	1	-0.56
1897	102171659	FOXA1	10.44 ± 0.27	5.59 ± 0.22	11.45 ± 0.49	0.00206	0.00412	-0.9		0.00749236	0.0149847	1.03	UP
1898	102171662	SEC61G	215.53 ± 18.9	271.3 ± 6.11	241.37 ± 2.06	0.0878	0.1756	0.33		0.0689821	0.137964	-0.17
1899	102171663	FAM208A	5.34 ± 0.08	3.41 ± 0.02	3.89 ± 0.07	0.00343	0.00686	-0.65		0.498305	0.996609	0.19
1900	102171664	COQ10B	4.87 ± 0.19	8.81 ± 0.46	8.91 ± 0.57	0.00038	0.00076	0.85		0.994658	1	0.02
1901	102171665	WNT7A	2.02 ± 0.15	1.53 ± 0.12	2.3 ± 0.19	0.497	0.994	-0.4		0.721017	1	0.59
1902	102171666	TRIP12	21.93 ± 0.44	19.55 ± 0.72	22.43 ± 0.67	0.445	0.89	-0.17		0.838359	1	0.2
1903	102171667	HMGA1	227.69 ± 9.93	230.02 ± 5.15	349.34 ± 18.33	0.957	1	0.01		3.23394e-16	6.46e-16	0.6
1904	102171668	CATSPER4	2.05 ± 0.14	1.93 ± 0.06	1.8 ± 0.06	0.837	1	-0.09		1	1	-0.1
1905	102171671	ATF6B	13.08 ± 0.34	12.41 ± 0.35	12.07 ± 0.13	0.751	1	-0.08		0.983129	1	-0.04
1906	102171672	ALDH4A1	19.83 ± 0.99	17.73 ± 0.57	24.79 ± 0.76	0.433	0.866	-0.16		0.195541	0.391082	0.48
1907	102171675	KIF13A	10.12 ± 0.23	7.8 ± 0.26	9.38 ± 0.1	0.0424	0.0848	-0.38		0.846771	1	0.27
1908	102171676	LOC102171676	2.76 ± 0.33	2.48 ± 0.23	1.92 ± 0.04	0.844	1	-0.15		0.732925	1	-0.37
1909	102171677	LOC102171677	27.22 ± 1.92	32.17 ± 1.34	31.93 ± 0.82	0.265	0.53	0.24		0.994112	1	-0.01
1910	102171678	PLK1	1.27 ± 0.07	2.63 ± 0.09	1.86 ± 0.01	0.00277	0.00554	1.05	UP	0.422172	0.844343	-0.5
1911	102171687	NGLY1	13.63 ± 0.52	12.15 ± 0.14	13.21 ± 0.68	0.473	0.946	-0.17		0.812256	1	0.12
1912	102171689	RACGAP1	7.18 ± 0.27	10.76 ± 0.15	7.26 ± 0.25	0.00206	0.00412	0.58		0.460938	0.921877	-0.57
1913	102171692	INCENP	2.35 ± 0.06	2.98 ± 0.16	2.96 ± 0.03	0.251	0.502	0.34		1	1	-0.01
1914	102171693	RASSF8	2.5 ± 0.22	2.51 ± 0.12	2.91 ± 0.23	0.982	1	0.01		0.881875	1	0.21
1915	102171694	LOC102171694	15.26 ± 0.52	11.2 ± 0.04	15.71 ± 0.54	0.683	1	-0.45		0.367421	0.734842	0.49
1916	102171695	SMDT1	145.46 ± 11.88	125.04 ± 2.24	166.91 ± 1.52	0.273	0.546	-0.22		8.9894e-05	0.0001798	0.42
1917	102171696	BRCC3	9.27 ± 0.2	8.55 ± 0.19	8.05 ± 0.15	0.663	1	-0.12		0.941225	1	-0.09
1918	102171700	RNF130	24.1 ± 0.37	18.9 ± 0.41	23.82 ± 0.38	0.0951	0.1902	-0.35		0.368634	0.737268	0.33
1919	102171703	LOC102171703	16.48 ± 0.59	8.99 ± 0.26	9.58 ± 0.34	0.00038	0.00076	-0.87		0.942863	1	0.09
1920	102171706	AFF4	7.21 ± 0.31	6.56 ± 0.15	7.27 ± 0.1	0.522	1	-0.13		0.992082	1	0.15
1921	102171707	FAM114A2	8.77 ± 0.17	9.36 ± 0.08	7.25 ± 0.24	0.704	1	0.09		0.677034	1	-0.37
1922	102171708	CORO2A	1.86 ± 0.05	1.68 ± 0.07	3.13 ± 0.09	0.649	1	-0.15		0.422171	0.844342	0.9
1923	102171711	IQGAP2	18.44 ± 0.67	17.08 ± 0.6	25.65 ± 1.16	0.617	1	-0.11		0.10193	0.203859	0.59
1924	102171716	BCL2L11	1.19 ± 0.1	1.54 ± 0.08	1.53 ± 0.05	0.249	0.498	0.37		0.560742	1	-0.01
1925	102171717	MRPL53	29.41 ± 1.01	29.12 ± 0.61	31.41 ± 0.31	0.954	1	-0.01		0.838359	1	0.11
1926	102171718	NPHP1	1.4 ± 0.06	1.04 ± 0.03	0.97 ± 0.04	0.294	0.588	-0.43		1	1	-0.1
1927	102171720	GJB2	1370.13 ± 11.78	923.21 ± 28.31	895.07 ± 45.78	0.0747	0.1494	-0.57		0.471081	0.942162	-0.04
1928	102171723	MRPS26	69.45 ± 7.61	72.94 ± 2.03	83.24 ± 2.97	0.779	1	0.07		0.487687	0.975374	0.19
1929	102171725	CRYAB	8.69 ± 0.38	38.6 ± 1.02	17.12 ± 0.38	0.00038	0.00076	2.15	UP	5.04371e-06	1.008e-05	-1.17	DN
1930	102171731	RFWD3	2.85 ± 0.21	3.92 ± 0.13	3.42 ± 0.03	0.0699	0.1398	0.46		0.498305	0.99661	-0.2
1931	102171733	DBNDD1	8.23 ± 0.51	6.04 ± 0.23	9.3 ± 0.39	0.081	0.162	-0.44		0.439998	0.879996	0.62
1932	102171737	ETV2	5.74 ± 0.5	2.44 ± 0.06	5.73 ± 0.31	0.00513	0.01026	-1.23	DN	0.00839727	0.0167945	1.23	UP
1933	102171738	NSRP1	13.45 ± 0.7	17.04 ± 0.63	11.73 ± 1.03	0.0963	0.1926	0.34		0.209714	0.419429	-0.54
1934	102171740	OXLD1	4.19 ± 0.17	2.73 ± 0.05	3.34 ± 0.16	0.0638	0.1276	-0.61		0.885708	1	0.29
1935	102171741	TM4SF18	2.73 ± 0.48	7.09 ± 0.91	3.06 ± 0.85	0.00038	0.00076	1.38	UP	0.0123086	0.0246173	-1.21	DN
1936	102171742	TRAF3	7.48 ± 0.36	8.73 ± 0.36	8.23 ± 0.25	0.339	0.678	0.22		0.905218	1	-0.08
1937	102171745	LOC102171745	13.54 ± 2.65	11.84 ± 1	8.8 ± 0.24	0.477	0.954	-0.19		0.653678	1	-0.43
1938	102171747	DUSP23	4.87 ± 0.33	5.91 ± 0.1	7.69 ± 0.15	0.393	0.786	0.28		0.691552	1	0.38
1939	102171751	LOC102171751	10.16 ± 0.24	9.67 ± 0.24	6.93 ± 0.33	0.801	1	-0.07		0.475334	0.950669	-0.48
1940	102171753	ZNF644	3.91 ± 0.26	2.98 ± 0.12	2.51 ± 0.33	0.17	0.34	-0.39		0.762605	1	-0.25
1941	102171754	BFAR	6.6 ± 0.31	4.17 ± 0.14	4.58 ± 0.16	0.0673	0.1346	-0.66		0.816131	1	0.13
1942	102171755	WBSCR22	25.15 ± 1.45	32.17 ± 0.73	35.13 ± 1.37	0.0825	0.165	0.36		0.844218	1	0.13
1943	102171757	LOC102171757	1.29 ± 0.06	1.49 ± 0.03	1.64 ± 0.02	0.573	1	0.2		0.560742	1	0.14
1944	102171758	LOC102171758	1.79 ± 0.22	1.66 ± 0.01	1.91 ± 0.06	0.869	1	-0.11		1	1	0.2
1945	102171760	KLHL7	1.77 ± 0.05	2.92 ± 0.04	2.62 ± 0.12	0.0284	0.0568	0.73		0.881875	1	-0.16
1946	102171761	CBX3	33.26 ± 0.3	33.11 ± 0.84	29.42 ± 0.92	0.98	1	-0.01		0.677034	1	-0.17
1947	102171764	LOC102171764	9793.18 ± 882.55	3556.35 ± 140.83	6200.24 ± 487.64	0.00451	0.00902	-1.46	DN	7.24825e-68	1.45e-67	0.8
1948	102171769	ZNF384	7.53 ± 0.08	6.29 ± 0.13	8.52 ± 0.18	0.246	0.492	-0.26		0.55875	1	0.44
1949	102171770	HTATSF1	10.23 ± 0.14	11.3 ± 0.21	7.87 ± 0.26	0.506	1	0.14		0.507547	1	-0.52
1950	102171772	UGDH	77.92 ± 4.68	220.29 ± 4.2	262.49 ± 3.55	0.00038	0.00076	1.5	UP	0.0106949	0.0213898	0.25
1951	102171773	FIP1L1	9.68 ± 0.23	9.94 ± 0.36	11.8 ± 0.33	0.886	1	0.04		0.784206	1	0.25
1952	102171776	TRIM56	2.51 ± 0.14	2.33 ± 0.17	2.09 ± 0.09	0.789	1	-0.11		1	1	-0.15
1953	102171777	B3GNT3	9.49 ± 0.09	12.02 ± 0.16	12.93 ± 1.16	0.112	0.224	0.34		0.85457	1	0.11
1954	102171780	CAMSAP3	11.27 ± 0.57	12.47 ± 0.95	13.89 ± 0.27	0.634	1	0.15		0.838359	1	0.16
1955	102171781	MPND	7.61 ± 0.55	7.72 ± 0.23	6.79 ± 0.3	0.954	1	0.02		0.89852	1	-0.19
1956	102171783	LOC102171783	4.33 ± 0.33	1.08 ± 0.22	2.24 ± 0.15	0.00706	0.01412	-2.01	DN	0.298903	0.597805	1.06
1957	102171788	LOC102171788	2.78 ± 0.71	4.22 ± 0.64	0.07 ± 0.02	0.613	1	0.6		0.151135	0.302	-5.86
1958	102171790	ASF1A	3.24 ± 0.11	5.27 ± 0.18	3.5 ± 0.14	0.0589	0.1178	0.7		0.577862	1	-0.59
1959	102171792	C10H15orf41	3.53 ± 0.06	2.59 ± 0.08	3.78 ± 0.23	0.308	0.616	-0.45		0.330752	0.661503	0.55
1960	102171795	XPO1	9.33 ± 0.18	13.44 ± 0.41	12.38 ± 0.68	0.00277	0.00554	0.53		0.885302	1	-0.12
1961	102171796	PMPCA	88.8 ± 3.44	77.51 ± 2.83	97.08 ± 1.6	0.324	0.648	-0.2		0.120816	0.241631	0.32
1962	102171798	PSPC1	9.12 ± 0.34	8.05 ± 0.18	5.75 ± 0.24	0.486	0.972	-0.18		0.598495	1	-0.48
1963	102171801	LAMA5	13.07 ± 0.38	7.12 ± 0.16	6.31 ± 0.22	0.00038	0.00076	-0.88		0.890824	1	-0.17
1964	102171806	UBE4B	13.47 ± 0.22	7.72 ± 0.26	12.6 ± 0.68	0.00038	0.00076	-0.8		0.194731	0.389463	0.71
1965	102171807	NOC2L	12.04 ± 0.77	20.25 ± 0.78	15.09 ± 0.46	0.00038	0.00076	0.75		0.299509	0.599018	-0.42
1966	102171808	LOC102171808	32.98 ± 4.4	36.1 ± 0.25	61.68 ± 5.31	0.735	1	0.13		0.000160118	0.000320236	0.77
1967	102171809	ORAI1	6.11 ± 0.13	6.57 ± 0.26	6.54 ± 0.14	0.782	1	0.1		1	1	-0.01
1968	102171810	ATP5SL	21.39 ± 0.79	19.92 ± 0.35	26.75 ± 0.52	0.652	1	-0.1		0.305037	0.610074	0.43
1969	102171811	IRF3	15.96 ± 0.38	12.02 ± 0.45	14.07 ± 0.62	0.045	0.09	-0.41		0.815114	1	0.23
1970	102171816	LOC102171816	3.01 ± 0.09	1.94 ± 0.14	2.7 ± 0.08	0.0923	0.1846	-0.63		0.422171	0.844342	0.47
1971	102171818	SP6	1.67 ± 0.13	5.54 ± 0.11	3.34 ± 0.23	0.00038	0.00076	1.73	UP	0.3723	0.7446	-0.73
1972	102171819	WBP2	52.64 ± 0.79	42.59 ± 1.13	61.76 ± 1.1	0.108	0.216	-0.31		0.00608406	0.0121681	0.54
1973	102171825	CRTAP	15.08 ± 0.41	9.7 ± 0.14	13.8 ± 0.51	0.00299	0.00598	-0.64		0.395667	0.791334	0.51
1974	102171828	PPP1R11	17.87 ± 0.19	17.04 ± 0.64	24.25 ± 0.77	0.776	1	-0.07		0.147018	0.294035	0.51
1975	102171829	PBXIP1	16.16 ± 0.66	16.09 ± 0.39	10.72 ± 0.07	0.98	1	-0.01		0.285912	0.571824	-0.59
1976	102171830	ENOSF1	3 ± 0.19	4.51 ± 0.17	2.01 ± 0.14	0.0869	0.1738	0.59		0.0142062	0.0284124	-1.16	DN
1977	102171831	LRIG2	3.07 ± 0.3	2.52 ± 0.05	2.37 ± 0.1	0.195	0.39	-0.28		0.513173	1	-0.09
1978	102171834	FUS	53.67 ± 1.79	55.65 ± 0.86	53.51 ± 2.46	0.819	1	0.05		0.8014	1	-0.06
1979	102171835	RRAGC	18.22 ± 0.44	13.96 ± 0.37	19.02 ± 0.45	0.0514	0.1028	-0.38		0.383961	0.767921	0.45
1980	102171836	SUN1	11.11 ± 0.57	15.25 ± 0.38	9.08 ± 0.15	0.0118	0.0236	0.46		0.113079	0.226159	-0.75
1981	102171841	LGALS8	10.49 ± 0.29	8.44 ± 0.06	8.82 ± 0.35	0.137	0.274	-0.31		0.876278	1	0.06
1982	102171844	TAF1D	23.49 ± 0.72	18.4 ± 0.53	15.64 ± 0.61	0.29	0.58	-0.35		0.632862	1	-0.23
1983	102171846	ARL1	26.63 ± 0.89	28.14 ± 0.21	27.87 ± 0.37	0.729	1	0.08		1	1	-0.01
1984	102171848	DHCR7	4.07 ± 0.16	6.36 ± 0.27	3.71 ± 0.23	0.0502	0.1004	0.65		0.557499	1	-0.78
1985	102171849	BEX5	16.17 ± 1.13	19.22 ± 0.54	16.76 ± 0.69	0.336	0.672	0.25		0.769692	1	-0.2
1986	102171850	SPX	1.91 ± 0.09	1.87 ± 0.02	2.3 ± 0.08	0.947	1	-0.03		1	1	0.3
1987	102171851	RNF128	15.32 ± 0.29	12.18 ± 0.35	15.83 ± 0.34	0.104	0.208	-0.33		0.487687	0.975374	0.38
1988	102171855	CDPF1	17.97 ± 1.04	15.77 ± 0.18	18.41 ± 0.29	0.367	0.734	-0.19		0.76064	1	0.22
1989	102171856	HADH	636.47 ± 23.94	729.5 ± 9.81	1023.98 ± 6.87	0.496	0.992	0.2		8.33496e-33	1.666e-32	0.49
1990	102171859	FAM3A	7.99 ± 0.14	11.34 ± 0.39	7.25 ± 0.06	0.0453	0.0906	0.51		0.269094	0.538188	-0.65
1991	102171860	NDUFB7	418 ± 21.27	432.55 ± 8.65	497.73 ± 12.72	0.839	1	0.05		0.00227587	0.00455174	0.2
1992	102171864	RPS9	591.71 ± 62.51	484.12 ± 12.86	850.07 ± 34.01	0.189	0.378	-0.29		4.30359e-54	8.6e-54	0.81
1993	102171866	UBE2D2	31.44 ± 1.76	34.39 ± 1.04	28.92 ± 0.54	0.543	1	0.13		0.587252	1	-0.25
1994	102171867	RNF126	38.08 ± 1.13	58.68 ± 1.09	52.49 ± 0.5	0.00038	0.00076	0.62		0.602825	1	-0.16
1995	102171872	SNAPC3	4.73 ± 0.11	4.35 ± 0.05	4.25 ± 0.13	0.724	1	-0.12		1	1	-0.04
1996	102171874	LOC102171874	23.87 ± 0.32	24.66 ± 0.53	27.42 ± 1.05	0.844	1	0.05		0.73054	1	0.15
1997	102171875	KLF4	79.5 ± 2.52	99.43 ± 2.85	141.02 ± 1.69	0.0962	0.1924	0.32		9.75136e-05	0.000195	0.5
1998	102171876	SH3BGRL2	26.57 ± 0.35	44.98 ± 0.82	34.17 ± 0.6	0.00038	0.00076	0.76		0.127419	0.254838	-0.4
[truncated: 9,136 more rows]
