# Supplementary material for: The Regulation of Ruminal Short-Chain Fatty Acids on the Functions of Rumen Barriers
Source: Front Physiol. 2019 Oct 25;10:1305. doi: 10.3389/fphys.2019.01305 (PMC6842973; doi:10.3389/fphys.2019.01305)
Supplement: TABLE S5 — Differentially expressed genes in the pathways related to the immune system and cellular processes when the diets shifted from LC to MC. [file Table_5.XLSX]

## Sheet: Sheet1
Pathway	Gene id	Gene	Gene description	LC	MC	log2(MC/LC)
Peroxisome	102185835	EPHX2	epoxide hydrolase 2	6.25 ± 0.45	28.42 ± 0.38	2.18
	102169854	MPV17L2	MPV17 mitochondrial inner membrane protein like 2	7.38 ± 0.54	24.69 ± 0.98	1.74
	100860742	NOS2	nitric oxide synthase 2	5.95 ± 0.13	14.40 ± 0.32	1.28
	102180980	HMGCL	3-hydroxymethyl-3-methylglutaryl-CoA lyase	218.58 ± 17.44	511.90 ± 11.46	1.23
	102191256	FAR1	fatty acyl-CoA reductase 1	7.65 ± 0.27	17.33 ± 0.50	1.18
	102187466	SLC25A17	solute carrier family 25 member 17	9.98 ± 0.24	21.54 ± 0.82	1.11
	102170433	CRAT	carnitine O-acetyltransferase	20.09 ± 0.84	41.61 ± 1.68	1.05
Apoptosis	102178700	LOC102178700	tubulin alpha-1B chain	110.20 ± 3.65	310.27 ± 7.54	1.49
	102180077	BIRC5	baculoviral IAP repeat containing 5	1.13 ± 0.08	3.04 ± 0.17	1.43
	102178119	LOC102178119	tubulin alpha-1D chain	40.24 ± 3.22	104.55 ± 2.39	1.38
	102178443	LMNB2	lamin B2	5.08 ± 0.32	12.02 ± 0.41	1.24
	102188158	DFFA	DNA fragmentation factor subunit alpha	11.74 ± 0.39	26.44 ± 0.39	1.17
	102178426	LOC102178426	tubulin alpha-1C chain	23.91 ± 0.87	49.94 ± 1.53	1.06
	102173997	LOC102173997	cytochrome c	139.90 ± 12.41	289.17 ± 2.38	1.05
Cell cycle	102184881	CHEK1	checkpoint kinase 1	1.15 ± 0.17	4.32 ± 0.07	1.9
	100861361	CDK1	cyclin dependent kinase 1	1.65 ± 0.09	5.00 ± 0.27	1.6
	102169080	MCM5	minichromosome maintenance complex component 5	4.72 ± 0.21	13.98 ± 0.29	1.57
	102172276	PCNA	proliferating cell nuclear antigen	10.72 ± 0.50	31.42 ± 1.10	1.55
	102191505	MAD2L1	mitotic arrest deficient 2 like 1	3.47 ± 0.34	9.88 ± 0.49	1.51
	102188170	CCNB1	cyclin B1	2.37 ± 0.09	6.71 ± 0.09	1.5
	102173134	MCM6	minichromosome maintenance complex component 6	6.13 ± 0.09	16.73 ± 0.22	1.45
	102171483	CDC20	cell division cycle 20	1.76 ± 0.04	4.33 ± 0.22	1.3
	102175140	MCM4	minichromosome maintenance complex component 4	7.50 ± 0.27	18.27 ± 0.26	1.28
	102175548	DBF4	DBF4 zinc finger	1.08 ± 0.06	2.49 ± 0.10	1.2
	102173380	MCM2	minichromosome maintenance complex component 2	4.16 ± 0.29	9.46 ± 0.22	1.19
	102173018	E2F1	E2F transcription factor 1	2.07 ± 0.07	4.50 ± 0.10	1.12
	102172762	SKP2	S-phase kinase associated protein 2	1.93 ± 0.12	4.01 ± 0.12	1.05
	102171678	PLK1	polo like kinase 1	1.27 ± 0.07	2.63 ± 0.09	1.05
	102183062	PTTG1	pituitary tumor-transforming 1	14.05 ± 1.63	28.37 ± 1.14	1.01
p53 signaling pathway	102184881	CHEK1	checkpoint kinase 1	1.15 ± 0.17	4.32 ± 0.07	1.9
	102185371	RRM2	ribonucleotide reductase regulatory subunit M2	1.51 ± 0.15	5.65 ± 0.36	1.9
	100861361	CDK1	cyclin dependent kinase 1	1.65 ± 0.09	5.00 ± 0.27	1.6
	102188170	CCNB1	cyclin B1	2.37 ± 0.09	6.71 ± 0.09	1.5
	102173997	LOC102173997	cytochrome c	139.90 ± 12.41	289.17 ± 2.38	1.05
Gap junction	102178409	TUBB6	tubulin beta 6 class V	6.13 ± 1.05	18.87 ± 2.08	1.62
	100861361	CDK1	cyclin dependent kinase 1	1.65 ± 0.09	5.00 ± 0.27	1.6
	102178700	LOC102178700	tubulin alpha-1B chain	110.20 ± 3.65	310.27 ± 7.54	1.49
	102178119	LOC102178119	tubulin alpha-1D chain	40.24 ± 3.22	104.55 ± 2.39	1.38
	102172952	LOC102172952	tubulin beta-2B chain	33.78 ± 2.11	71.11 ± 1.46	1.07
	102178426	LOC102178426	tubulin alpha-1C chain	23.91 ± 0.87	49.94 ± 1.53	1.06
Tight junction	102172276	PCNA	proliferating cell nuclear antigen	10.72 ± 0.50	31.42 ± 1.10	1.55
	102178700	LOC102178700	tubulin alpha-1B chain	110.20 ± 3.65	310.27 ± 7.54	1.49
	102178119	LOC102178119	tubulin alpha-1D chain	40.24 ± 3.22	104.55 ± 2.39	1.38
	102188896	CLDN7	claudin 7	2.03 ± 0.18	4.86 ± 0.13	1.26
	102178787	CLDN3	claudin 3	0.92 ± 0.04	2.13 ± 0.08	1.22
	102178426	LOC102178426	tubulin alpha-1C chain	23.91 ± 0.87	49.94 ± 1.53	1.06
	102169016	PRKCE	protein kinase C epsilon	1.40 ± 0.02	2.82 ± 0.07	1.01
	102172434	HSPA4	heat shock protein family A (Hsp70) member 4	20.98 ± 0.48	42.29 ± 0.22	1.01
Endocytosis	106503831	LOC106503831	IQ motif and SEC7 domain-containing protein 2	28.09 ± 1.96	3.46 ± 1.56	-3.02
	100861303	CSF1R	colony stimulating factor 1 receptor	5.88 ± 0.27	1.86 ± 0.05	-1.66
	102169916	CXCR4	C-X-C motif chemokine receptor 4	3.53 ± 0.50	1.17 ± 0.17	-1.59
	102181186	MET	MET proto-oncogene, receptor tyrosine kinase	3.71 ± 0.08	1.35 ± 0.06	-1.47
	102170938	FGFR2	fibroblast growth factor receptor 2	16.72 ± 0.47	6.43 ± 0.09	-1.38
	102181202	LOC102181202	BOLA class I histocompatibility antigen, alpha chain BL3-7	29.79 ± 0.36	12.12 ± 1.09	-1.3
	102182646	ASAP3	ArfGAP with SH3 domain, ankyrin repeat and PH domain 3	2.11 ± 0.14	0.95 ± 0.09	-1.15
	102191364	TGFB1	transforming growth factor beta 1	13.10 ± 0.68	6.17 ± 0.02	-1.09
	102181782	SPG21	SPG21, maspardin	13.12 ± 0.45	6.19 ± 0.29	-1.08
	102187491	F2R	coagulation factor II thrombin receptor	2.22 ± 0.35	1.05 ± 0.10	-1.07
	102174007	PDGFRA	platelet derived growth factor receptor alpha	2.53 ± 0.57	1.24 ± 0.12	-1.03
	102169293	SMAD3	SMAD family member 3	4.25 ± 0.27	2.12 ± 0.10	-1
	102183630	CYTH2	cytohesin 2	43.92 ± 2.42	21.95 ± 1.03	-1
Phagosome	102188835	C1R	complement C1r	30.43 ± 0.89	5.07 ± 0.14	-2.59
	102185330	CORO1A	coronin 1A	7.31 ± 0.14	1.41 ± 0.10	-2.38
	100860826	LOC100860826	complement C3	10.00 ± 1.74	2.13 ± 0.31	-2.23
	102180638	TAP2	transporter 2, ATP binding cassette subfamily B member	6.26 ± 0.18	1.39 ± 0.06	-2.17
	102181173	TAP1	transporter 1, ATP binding cassette subfamily B member	11.53 ± 0.21	2.71 ± 0.03	-2.09
	102185465	CTSL	cathepsin L	7.94 ± 0.49	2.04 ± 0.14	-1.96
	102180664	LOC102180664	boLa class II histocompatibility antigen, DQB*0101 beta chain	32.74 ± 1.05	8.94 ± 0.42	-1.87
	102179675	THBS4	thrombospondin 4	15.14 ± 1.67	4.38 ± 0.32	-1.79
	102187998	LOC102187998	HLA class II histocompatibility antigen, DM beta chain	12.70 ± 0.45	3.76 ± 0.10	-1.76
	102179937	LOC102179937	SLA class II histocompatibility antigen, DQ haplotype D alpha chain	10.71 ± 0.66	3.25 ± 0.18	-1.72
	102189356	LOC102189356	HLA class II histocompatibility antigen, DR alpha chain	87.31 ± 2.29	29.25 ± 1.47	-1.58
	102188267	LOC102188267	HLA class II histocompatibility antigen, DM alpha chain	8.45 ± 0.33	3.06 ± 0.25	-1.47
	102181202	LOC102181202	BOLA class I histocompatibility antigen, alpha chain BL3-7	29.79 ± 0.36	12.12 ± 1.09	-1.3
	102171371	MRC2	mannose receptor C type 2	3.05 ± 0.22	1.30 ± 0.09	-1.23
	102173110	RAB7B	RAB7B, member RAS oncogene family	11.20 ± 0.58	4.81 ± 0.37	-1.22
	100860813	LOC100860813	HA25	33.01 ± 1.15	14.27 ± 0.81	-1.21
	102177056	CD14	CD14 molecule	16.25 ± 0.56	7.05 ± 0.13	-1.21
	100860747	TLR2	toll like receptor 2	19.06 ± 0.53	8.37 ± 0.20	-1.19
	102183747	CTSS	cathepsin S	10.54 ± 0.11	4.65 ± 0.44	-1.18
	102173458	LOC102173458	DLA class II histocompatibility antigen, DR-1 beta chain-like	11.77 ± 0.12	5.61 ± 0.20	-1.07
	102175986	RILP	Rab interacting lysosomal protein	2.20 ± 0.10	1.10 ± 0.07	-1
Focal adhesion	102168934	PDGFC	platelet derived growth factor C	7.19 ± 0.22	1.85 ± 0.11	-1.96
	102179675	THBS4	thrombospondin 4	15.14 ± 1.67	4.38 ± 0.32	-1.79
	102184426	PDGFRB	platelet derived growth factor receptor beta	3.27 ± 0.51	1.12 ± 0.11	-1.55
	102181186	MET	MET proto-oncogene, receptor tyrosine kinase	3.71 ± 0.08	1.35 ± 0.06	-1.47
	102181989	ERBB2	erb-b2 receptor tyrosine kinase 2	70.88 ± 3.07	29.13 ± 1.07	-1.28
	102189645	VAV3	vav guanine nucleotide exchange factor 3	19.67 ± 1.26	8.37 ± 0.22	-1.23
	102176677	COL4A6	collagen type IV alpha 6 chain	2.62 ± 0.02	1.15 ± 0.04	-1.19
	102191301	ITGB8	integrin subunit beta 8	11.29 ± 0.27	5.04 ± 0.08	-1.16
	102191119	VWF	von Willebrand factor	8.04 ± 0.80	3.66 ± 0.22	-1.14
	100860828	COL1A1	collagen type I alpha 1 chain	41.63 ± 5.95	19.94 ± 1.77	-1.06
	100860940	COL1A2	collagen type I alpha 2 chain	44.59 ± 5.79	21.60 ± 2.00	-1.05
	102176661	LAMB1	laminin subunit beta 1	8.09 ± 0.71	3.96 ± 0.21	-1.03
	102174007	PDGFRA	platelet derived growth factor receptor alpha	2.53 ± 0.57	1.24 ± 0.12	-1.03
	102170135	PIK3R2	phosphoinositide-3-kinase regulatory subunit 2	33.47 ± 1.74	16.57 ± 1.13	-1.01
Signaling pathways regulating pluripotency of stem cells	102172273	OTX1	orthodenticle homeobox 1	7.83 ± 0.74	1.61 ± 0.08	-2.29
	102177945	WNT10A	Wnt family member 10A	13.85 ± 0.52	4.98 ± 0.06	-1.48
	102170938	FGFR2	fibroblast growth factor receptor 2	16.72 ± 0.47	6.43 ± 0.09	-1.38
	100861250	INHBB	inhibin beta B subunit	2.76 ± 0.23	1.16 ± 0.24	-1.25
	102186186	ACVR1B	activin A receptor type 1B	29.99 ± 1.03	13.92 ± 0.76	-1.11
	102170921	WNT5A	Wnt family member 5A	5.09 ± 0.28	2.47 ± 0.20	-1.04
	102170135	PIK3R2	phosphoinositide-3-kinase regulatory subunit 2	33.47 ± 1.74	16.57 ± 1.13	-1.01
	102169293	SMAD3	SMAD family member 3	4.25 ± 0.27	2.12 ± 0.10	-1
	102176310	WNT5B	Wnt family member 5B	7.03 ± 0.21	3.52 ± 0.09	-1
Antigen processing and presentation	102180638	TAP2	transporter 2, ATP binding cassette subfamily B member	6.26 ± 0.18	1.39 ± 0.06	-2.17
	102181173	TAP1	transporter 1, ATP binding cassette subfamily B member	11.53 ± 0.21	2.71 ± 0.03	-2.09
	102185465	CTSL	cathepsin L	7.94 ± 0.49	2.04 ± 0.14	-1.96
	102185560	CD74	CD74 molecule	101.00 ± 2.13	26.90 ± 0.10	-1.91
	102180664	LOC102180664	boLa class II histocompatibility antigen, DQB*0101 beta chain	32.74 ± 1.05	8.94 ± 0.42	-1.87
	102187998	LOC102187998	HLA class II histocompatibility antigen, DM beta chain	12.70 ± 0.45	3.76 ± 0.10	-1.76
	102179937	LOC102179937	SLA class II histocompatibility antigen, DQ haplotype D alpha chain	10.71 ± 0.66	3.25 ± 0.18	-1.72
	102189356	LOC102189356	HLA class II histocompatibility antigen, DR alpha chain	87.31 ± 2.29	29.25 ± 1.47	-1.58
	102188267	LOC102188267	HLA class II histocompatibility antigen, DM alpha chain	8.45 ± 0.33	3.06 ± 0.25	-1.47
	102181202	LOC102181202	BOLA class I histocompatibility antigen, alpha chain BL3-7	29.79 ± 0.36	12.12 ± 1.09	-1.3
	100860813	LOC100860813	HA25	33.01 ± 1.15	14.27 ± 0.81	-1.21
	102183747	CTSS	cathepsin S	10.54 ± 0.11	4.65 ± 0.44	-1.18
	102173458	LOC102173458	DLA class II histocompatibility antigen, DR-1 beta chain-like	11.77 ± 0.12	5.61 ± 0.20	-1.07
	102183386	NFYC	nuclear transcription factor Y subunit gamma	23.16 ± 0.87	11.50 ± 0.52	-1.01
Complement and coagulation cascades	102188835	C1R	complement C1r	30.43 ± 0.89	5.07 ± 0.14	-2.59
	100860826	LOC100860826	complement C3	10.00 ± 1.74	2.13 ± 0.31	-2.23
	102173560	CFD	complement factor D	4.78 ± 0.27	1.11 ± 0.11	-2.11
	102189289	C1S	complement C1s	22.52 ± 0.64	5.43 ± 0.39	-2.05
	102188193	PLAU	plasminogen activator, urokinase	5.63 ± 0.21	1.85 ± 0.14	-1.6
	102186813	C1QB	complement C1q B chain	8.85 ± 0.53	3.05 ± 0.36	-1.54
	102187545	C1QA	complement C1q A chain	11.03 ± 0.67	3.92 ± 0.45	-1.49
	102187279	C1QC	complement C1q C chain	10.44 ± 0.39	3.83 ± 0.31	-1.45
	102191119	VWF	von Willebrand factor	8.04 ± 0.80	3.66 ± 0.22	-1.14
	102187491	F2R	coagulation factor II thrombin receptor	2.22 ± 0.35	1.05 ± 0.10	-1.07
	102185317	TFPI	tissue factor pathway inhibitor	2.83 ± 0.22	1.40 ± 0.16	-1.02
Fc epsilon RI signaling pathway	102169516	MAP2K6	mitogen-activated protein kinase kinase 6	5.53 ± 0.45	1.00 ± 0.03	-2.47
	102174120	SYK	spleen associated tyrosine kinase	5.54 ± 0.15	1.95 ± 0.02	-1.51
	102191004	FCER1G	Fc fragment of IgE receptor Ig	3.26 ± 0.19	1.29 ± 0.06	-1.33
	102189645	VAV3	vav guanine nucleotide exchange factor 3	19.67 ± 1.26	8.37 ± 0.22	-1.23
	102170135	PIK3R2	phosphoinositide-3-kinase regulatory subunit 2	33.47 ± 1.74	16.57 ± 1.13	-1.01
Hematopoietic cell lineage	102180664	LOC102180664	boLa class II histocompatibility antigen, DQB*0101 beta chain	32.74 ± 1.05	8.94 ± 0.42	-1.87
	102187998	LOC102187998	HLA class II histocompatibility antigen, DM beta chain	12.70 ± 0.45	3.76 ± 0.10	-1.76
	102179937	LOC102179937	SLA class II histocompatibility antigen, DQ haplotype D alpha chain	10.71 ± 0.66	3.25 ± 0.18	-1.72
	102185051	CSF1	colony stimulating factor 1	5.85 ± 0.07	1.85 ± 0.03	-1.67
	100861303	CSF1R	colony stimulating factor 1 receptor	5.88 ± 0.27	1.86 ± 0.05	-1.66
	102189356	LOC102189356	HLA class II histocompatibility antigen, DR alpha chain	87.31 ± 2.29	29.25 ± 1.47	-1.58
	102188267	LOC102188267	HLA class II histocompatibility antigen, DM alpha chain	8.45 ± 0.33	3.06 ± 0.25	-1.47
	100860813	LOC100860813	HA25	33.01 ± 1.15	14.27 ± 0.81	-1.21
	102177056	CD14	CD14 molecule	16.25 ± 0.56	7.05 ± 0.13	-1.21
	102173458	LOC102173458	DLA class II histocompatibility antigen, DR-1 beta chain-like	11.77 ± 0.12	5.61 ± 0.20	-1.07
Intestinal immune network for IgA production	102180664	LOC102180664	boLa class II histocompatibility antigen, DQB*0101 beta chain	32.74 ± 1.05	8.94 ± 0.42	-1.87
	102187998	LOC102187998	HLA class II histocompatibility antigen, DM beta chain	12.70 ± 0.45	3.76 ± 0.10	-1.76
	102179937	LOC102179937	SLA class II histocompatibility antigen, DQ haplotype D alpha chain	10.71 ± 0.66	3.25 ± 0.18	-1.72
	102169916	CXCR4	C-X-C motif chemokine receptor 4	3.53 ± 0.50	1.17 ± 0.17	-1.59
	102189356	LOC102189356	HLA class II histocompatibility antigen, DR alpha chain	87.31 ± 2.29	29.25 ± 1.47	-1.58
	102188267	LOC102188267	HLA class II histocompatibility antigen, DM alpha chain	8.45 ± 0.33	3.06 ± 0.25	-1.47
	100860813	LOC100860813	HA25	33.01 ± 1.15	14.27 ± 0.81	-1.21
	102191364	TGFB1	transforming growth factor beta 1	13.10 ± 0.68	6.17 ± 0.02	-1.09
	102173458	LOC102173458	DLA class II histocompatibility antigen, DR-1 beta chain-like	11.77 ± 0.12	5.61 ± 0.20	-1.07
Leukocyte transendothelial migration	102184364	MMP2	matrix metallopeptidase 2	15.42 ± 2.75	3.88 ± 0.34	-1.99
	102178188	THY1	Thy-1 cell surface antigen	5.28 ± 0.65	1.73 ± 0.07	-1.61
	102169916	CXCR4	C-X-C motif chemokine receptor 4	3.53 ± 0.50	1.17 ± 0.17	-1.59
	102189645	VAV3	vav guanine nucleotide exchange factor 3	19.67 ± 1.26	8.37 ± 0.22	-1.23
	102173066	CLDN23	claudin 23	6.56 ± 0.40	2.82 ± 0.05	-1.22
	102184810	PTK2B	protein tyrosine kinase 2 beta	5.11 ± 0.28	2.25 ± 0.18	-1.18
	102170135	PIK3R2	phosphoinositide-3-kinase regulatory subunit 2	33.47 ± 1.74	16.57 ± 1.13	-1.01
Platelet activation	102174120	SYK	spleen associated tyrosine kinase	5.54 ± 0.15	1.95 ± 0.02	-1.51
	102191004	FCER1G	Fc fragment of IgE receptor Ig	3.26 ± 0.19	1.29 ± 0.06	-1.33
	102191119	VWF	von Willebrand factor	8.04 ± 0.80	3.66 ± 0.22	-1.14
	100860938	COL3A1	collagen type III alpha 1 chain	89.09 ± 12.86	42.15 ± 3.85	-1.08
	102187491	F2R	coagulation factor II thrombin receptor	2.22 ± 0.35	1.05 ± 0.10	-1.07
	100860828	COL1A1	collagen type I alpha 1 chain	41.63 ± 5.95	19.94 ± 1.77	-1.06
	100860940	COL1A2	collagen type I alpha 2 chain	44.59 ± 5.79	21.60 ± 2.00	-1.05
	102170135	PIK3R2	phosphoinositide-3-kinase regulatory subunit 2	33.47 ± 1.74	16.57 ± 1.13	-1.01
Th1 and Th2 cell differentiation	102180664	LOC102180664	boLa class II histocompatibility antigen, DQB*0101 beta chain	32.74 ± 1.05	8.94 ± 0.42	-1.87
	102187998	LOC102187998	HLA class II histocompatibility antigen, DM beta chain	12.70 ± 0.45	3.76 ± 0.10	-1.76
	102179937	LOC102179937	SLA class II histocompatibility antigen, DQ haplotype D alpha chain	10.71 ± 0.66	3.25 ± 0.18	-1.72
	102189356	LOC102189356	HLA class II histocompatibility antigen, DR alpha chain	87.31 ± 2.29	29.25 ± 1.47	-1.58
	102188267	LOC102188267	HLA class II histocompatibility antigen, DM alpha chain	8.45 ± 0.33	3.06 ± 0.25	-1.47
	100860813	LOC100860813	HA25	33.01 ± 1.15	14.27 ± 0.81	-1.21
	102173458	LOC102173458	DLA class II histocompatibility antigen, DR-1 beta chain-like	11.77 ± 0.12	5.61 ± 0.20	-1.07
	102189768	JAG1	jagged 1	14.33 ± 0.45	6.88 ± 0.04	-1.06
	102172636	NOTCH1	notch 1	12.10 ± 0.26	5.83 ± 0.14	-1.05
Th17 cell differentiation	102180664	LOC102180664	boLa class II histocompatibility antigen, DQB*0101 beta chain	32.74 ± 1.05	8.94 ± 0.42	-1.87
	102187998	LOC102187998	HLA class II histocompatibility antigen, DM beta chain	12.70 ± 0.45	3.76 ± 0.10	-1.76
	102179937	LOC102179937	SLA class II histocompatibility antigen, DQ haplotype D alpha chain	10.71 ± 0.66	3.25 ± 0.18	-1.72
	102189356	LOC102189356	HLA class II histocompatibility antigen, DR alpha chain	87.31 ± 2.29	29.25 ± 1.47	-1.58
	102188267	LOC102188267	HLA class II histocompatibility antigen, DM alpha chain	8.45 ± 0.33	3.06 ± 0.25	-1.47
	100860813	LOC100860813	HA25	33.01 ± 1.15	14.27 ± 0.81	-1.21
	102191364	TGFB1	transforming growth factor beta 1	13.10 ± 0.68	6.17 ± 0.02	-1.09
	102173458	LOC102173458	DLA class II histocompatibility antigen, DR-1 beta chain-like	11.77 ± 0.12	5.61 ± 0.20	-1.07
	102169293	SMAD3	SMAD family member 3	4.25 ± 0.27	2.12 ± 0.10	-1
Toll-like receptor signaling pathway	102169516	MAP2K6	mitogen-activated protein kinase kinase 6	5.53 ± 0.45	1.00 ± 0.03	-2.47
	102183473	CTSK	cathepsin K	7.56 ± 0.81	3.17 ± 0.30	-1.25
	102177056	CD14	CD14 molecule	16.25 ± 0.56	7.05 ± 0.13	-1.21
	100860747	TLR2	toll like receptor 2	19.06 ± 0.53	8.37 ± 0.20	-1.19
	100860844	TLR5	toll like receptor 5	12.05 ± 0.52	5.60 ± 0.18	-1.11
	102183809	IKBKE	inhibitor of nuclear factor kappa B kinase subunit epsilon	10.60 ± 0.59	5.24 ± 0.17	-1.02
	102170135	PIK3R2	phosphoinositide-3-kinase regulatory subunit 2	33.47 ± 1.74	16.57 ± 1.13	-1.01
values are mean±SE
